# Supplementary material for: Impact of Kidney Function on the Blood Proteome and on Protein Cardiovascular Risk Biomarkers in Patients With Stable Coronary Heart Disease
Source: PubMed Central journal article supplement — J Am Heart Assoc. 2020 Jul 22;9(15):e016463. doi: 10.1161/JAHA.120.016463 (PMC7792282; doi:10.1161/jaha.120.016463), 2020-07-22

# **SUPPLEMENTAL MATERIAL**

**Table S1. Summary of the average total-run (i.e. intra-run plus inter-run) % coefficients of variation (%CVs) for 1129 proteins measured by modified aptamers in EDTA plasma across 3 runs, each run performed by a different laboratory technician.**

| <b>Percentile of protein targets</b> | <b>Total-Run %CV</b> |
|--------------------------------------|----------------------|
| <b>5%</b>                            | <b>≤ 2.4%</b>        |
| <b>25%</b>                           | <b>≤ 3.1%</b>        |
| <b>50%</b>                           | <b>≤ 3.9%</b>        |
| <b>75%</b>                           | <b>≤ 5.0%</b>        |
| <b>95%</b>                           | <b>≤ 10.5%</b>       |

The average was computed from three individual samples performed in triplicate on each run.

**Table S2. Spearman rho correlations between eGFR (CKD-EPI 2009) and plasma concentrations of 1054 proteins measured.**

| Protein                                               | UniProt ID | Spearman rho | p-value                 | Molecular Weight (kDa) |
|-------------------------------------------------------|------------|--------------|-------------------------|------------------------|
| Cystatin-C                                            | P01034     | -0.74        | 1.12x10 <sup>-163</sup> | 15.799                 |
| Insulin-like growth factor-binding protein 6          | P24592     | -0.7         | 2.86x10 <sup>-138</sup> | 25.322                 |
| Tumor necrosis factor receptor superfamily member 1A  | P19438     | -0.65        | 2.51x10 <sup>-114</sup> | 50.495                 |
| Neuroblastoma suppressor of tumorigenicity 1          | P41271     | -0.64        | 2.29x10 <sup>-109</sup> | 23.169                 |
| Beta-2-microglobulin                                  | P61769     | -0.63        | 1.11x10 <sup>-102</sup> | 13.715                 |
| Tumor necrosis factor receptor superfamily member 19L | Q969Z4     | -0.62        | 1.01x10 <sup>-100</sup> | 46.092                 |
| Cathepsin H                                           | P09668     | -0.61        | 1.51x10 <sup>-95</sup>  | 37.394                 |
| Follistatin-related protein 3                         | O95633     | -0.58        | 7.07x10 <sup>-87</sup>  | 27.663                 |
| Endothelial cell-selective adhesion molecule          | Q96AP7     | -0.58        | 4.98x10 <sup>-86</sup>  | 15.170                 |
| Adapter molecule crk                                  | P46108     | -0.58        | 2.86x10 <sup>-85</sup>  | 33.831                 |
| Cerebral dopamine neurotrophic factor                 | Q49AH0     | -0.57        | 3.10x10 <sup>-81</sup>  | 20.964                 |
| RGM domain family member B                            | Q6NW40     | -0.54        | 1.43x10 <sup>-73</sup>  | 47.547                 |
| Ephrin-A5                                             | P52803     | -0.53        | 3.39x10 <sup>-70</sup>  | 26.297                 |
| Trefoil factor 3                                      | Q07654     | -0.53        | 6.07x10 <sup>-69</sup>  | 8.641                  |
| Tumor necrosis factor receptor superfamily member 27  | Q9HAV5     | -0.53        | 1.33x10 <sup>-67</sup>  | 32.759                 |
| Endostatin                                            | P39060     | -0.52        | 1.03x10 <sup>-66</sup>  | 178.188                |
| Ephrin-A4                                             | P52798     | -0.52        | 3.27x10 <sup>-66</sup>  | 22.386                 |
| Netrin receptor UNC5C                                 | O95185     | -0.51        | 1.43x10 <sup>-64</sup>  | 103.146                |
| Ephrin type-B receptor 6                              | O15197     | -0.51        | 3.98x10 <sup>-64</sup>  | 110.700                |
| Tumor necrosis factor receptor superfamily member 1B  | P20333     | -0.51        | 1.40x10 <sup>-63</sup>  | 48.291                 |
| Glutathione S-transferase P                           | P09211     | -0.51        | 5.89x10 <sup>-62</sup>  | 23.356                 |
| C-C motif chemokine 14                                | Q16627     | -0.5         | 3.76x10 <sup>-61</sup>  | 10.678                 |

| <b>Protein</b>                                       | <b>UniProt ID</b> | <b>Spearman rho</b> | <b>p-value</b>         | <b>Molecular Weight (kDa)</b> |
|------------------------------------------------------|-------------------|---------------------|------------------------|-------------------------------|
| Macrophage-capping protein                           | P40121            | -0.5                | 6.26x10 <sup>-61</sup> | 38.499                        |
| Junctional adhesion molecule B                       | P57087            | -0.5                | 2.76x10 <sup>-59</sup> | 33.207                        |
| Layilin                                              | Q6UX15            | -0.49               | 1.56x10 <sup>-57</sup> | 43.108                        |
| Ephrin type-A receptor 2                             | P29317            | -0.49               | 2.11x10 <sup>-57</sup> | 54.305                        |
| Tyrosine-protein kinase transmembrane receptor ROR1  | Q01973            | -0.48               | 2.10x10 <sup>-56</sup> | 104.283                       |
| Scavenger receptor class F member 1                  | Q14162            | -0.47               | 1.69x10 <sup>-53</sup> | 87.387                        |
| Fatty acid-binding protein, heart                    | P05413            | -0.47               | 2.37x10 <sup>-52</sup> | 14.858                        |
| Testican-2                                           | Q92563            | 0.46                | 2.58x10 <sup>-51</sup> | 46.779                        |
| Netrin receptor UNC5D                                | Q6UXZ4            | -0.46               | 3.25x10 <sup>-49</sup> | 105.880                       |
| Myoglobin                                            | P02144            | -0.45               | 4.71x10 <sup>-49</sup> | 17.184                        |
| Tumor necrosis factor receptor superfamily member 19 | Q9NS68            | -0.45               | 3.70x10 <sup>-47</sup> | 46.015                        |
| Elafin                                               | P19957            | -0.45               | 6.13x10 <sup>-47</sup> | 12.270                        |
| Epidermal growth factor receptor                     | P00533            | 0.44                | 1.96x10 <sup>-46</sup> | 134.277                       |
| Interleukin-15 receptor subunit alpha                | Q13261            | -0.44               | 8.60x10 <sup>-46</sup> | 28.233                        |
| Receptor tyrosine-protein kinase erbB-3              | P21860            | 0.43                | 4.03x10 <sup>-44</sup> | 148.098                       |
| Metalloproteinase inhibitor 1                        | P01033            | -0.43               | 4.76x10 <sup>-44</sup> | 23.171                        |
| Antileukoproteinase                                  | P03973            | -0.43               | 1.81x10 <sup>-42</sup> | 14.326                        |
| Cystatin-M                                           | Q15828            | -0.42               | 3.97x10 <sup>-41</sup> | 16.511                        |
| Cathepsin L2                                         | O60911            | 0.42                | 1.66x10 <sup>-40</sup> | 37.329                        |
| Chordin-like protein 1                               | Q9BU40            | -0.41               | 7.30x10 <sup>-40</sup> | 51.168                        |
| Complement factor D                                  | P00746            | -0.41               | 8.38x10 <sup>-40</sup> | 27.033                        |
| Coiled-coil domain-containing protein 80             | Q76M96            | -0.41               | 9.08x10 <sup>-40</sup> | 10.174                        |

| <b>Protein</b>                                             | <b>UniProt ID</b> | <b>Spearman rho</b> | <b>p-value</b>         | <b>Molecular Weight (kDa)</b> |
|------------------------------------------------------------|-------------------|---------------------|------------------------|-------------------------------|
| Delta-like protein 1                                       | O00548            | -0.41               | 1.12x10 <sup>-39</sup> | 78.056                        |
| Complement decay-accelerating factor                       | P08174            | -0.41               | 2.69x10 <sup>-39</sup> | 41.400                        |
| Hepatitis A virus cellular receptor 2                      | Q8TDQ0            | -0.41               | 1.35x10 <sup>-38</sup> | 33.394                        |
| Alpha-2-antiplasmin                                        | P08697            | 0.41                | 1.42x10 <sup>-38</sup> | 54.566                        |
| Tumor necrosis factor ligand superfamily member 15         | O95150            | -0.4                | 3.90x10 <sup>-38</sup> | 28.087                        |
| Neurexin-1-beta                                            | P58400            | -0.4                | 4.40x10 <sup>-38</sup> | 50.424                        |
| Tumor necrosis factor receptor superfamily member 21       | O75509            | -0.4                | 1.62x10 <sup>-37</sup> | 71.845                        |
| Ck-beta-8-1                                                | P55773            | -0.4                | 1.80x10 <sup>-36</sup> | 13.411                        |
| Neurexin-3-beta                                            | Q9HDB5            | -0.39               | 5.94x10 <sup>-36</sup> | 69.305                        |
| Cystatin-SA                                                | P09228            | -0.38               | 2.99x10 <sup>-34</sup> | 16.455                        |
| Bone morphogenetic protein 1                               | P13497            | 0.38                | 6.44x10 <sup>-34</sup> | 111.249                       |
| Kallikrein-11                                              | Q9UBX7            | -0.38               | 6.96x10 <sup>-34</sup> | 31.059                        |
| Platelet-activating factor acetylhydrolase IB subunit beta | P68402            | -0.38               | 1.05x10 <sup>-33</sup> | 25.569                        |
| C-C motif chemokine 23                                     | P55773            | -0.38               | 1.05x10 <sup>-33</sup> | 13.411                        |
| Macrophage metalloelastase                                 | P39900            | -0.38               | 1.22x10 <sup>-33</sup> | 54.002                        |
| Endoplasmic reticulum resident protein 29                  | P30040            | -0.38               | 1.61x10 <sup>-33</sup> | 28.993                        |
| SLIT and NTRK-like protein 5                               | O94991            | -0.38               | 4.63x10 <sup>-33</sup> | 107.486                       |
| Transforming growth factor beta receptor type 3            | Q03167            | -0.38               | 7.66x10 <sup>-33</sup> | 93.499                        |
| Insulin-like growth factor-binding protein 2               | P18065            | -0.37               | 2.00x10 <sup>-32</sup> | 34.814                        |
| Vascular endothelial growth factor receptor 2              | P35968            | 0.37                | 1.48x10 <sup>-31</sup> | 151.527                       |
| Dual 3',5'-cyclic-AMP and -GMP phosphodiesterase 11A       | Q9HCR9            | 0.37                | 2.03x10 <sup>-31</sup> | 104.752                       |
| Matrilysin                                                 | P09237            | -0.37               | 4.55x10 <sup>-31</sup> | 29.677                        |

| <b>Protein</b>                                                    | <b>UniProt ID</b> | <b>Spearman rho</b> | <b>p-value</b>         | <b>Molecular Weight (kDa)</b> |
|-------------------------------------------------------------------|-------------------|---------------------|------------------------|-------------------------------|
| Dual specificity mitogen-activated protein kinase kinase 2        | P36507            | -0.36               | 1.00x10 <sup>-30</sup> | 44.424                        |
| Retinoic acid receptor responder protein 2                        | Q99969            | -0.36               | 1.12x10 <sup>-30</sup> | 18.618                        |
| Cell adhesion molecule 3                                          | Q8N126            | -0.36               | 1.70x10 <sup>-30</sup> | 43.300                        |
| A disintegrin and metalloproteinase with thrombospondin motifs 13 | Q76LX8            | 0.36                | 5.02x10 <sup>-30</sup> | 153.604                       |
| Pappalysin-1                                                      | Q13219            | -0.36               | 8.10x10 <sup>-30</sup> | 180.973                       |
| Resistin                                                          | Q9HD89            | -0.36               | 9.52x10 <sup>-30</sup> | 11.419                        |
| Tissue Factor                                                     | P13726            | -0.36               | 1.18x10 <sup>-29</sup> | 33.068                        |
| Cystatin-D                                                        | P28325            | -0.36               | 1.91x10 <sup>-29</sup> | 16.080                        |
| Cell adhesion molecule-related/down-regulated by oncogenes        | Q4KMG0            | 0.35                | 5.31x10 <sup>-29</sup> | 139.147                       |
| Interleukin-17 receptor C                                         | Q8NAC3            | -0.35               | 1.30x10 <sup>-28</sup> | 86.240                        |
| Cystatin-SN                                                       | P01037            | -0.35               | 4.37x10 <sup>-28</sup> | 16.388                        |
| Carbonic anhydrase 3                                              | P07451            | -0.35               | 6.17x10 <sup>-28</sup> | 39.557                        |
| Kallikrein-8                                                      | O60259            | -0.35               | 8.80x10 <sup>-28</sup> | 28.048                        |
| Fibroblast growth factor 20                                       | Q9NP95            | 0.35                | 1.17x10 <sup>-27</sup> | 23.499                        |
| Melanoma-derived growth regulatory protein                        | Q16674            | -0.34               | 2.30x10 <sup>-26</sup> | 14.509                        |
| Ciliary neurotrophic factor receptor subunit alpha                | P26992            | -0.33               | 5.32x10 <sup>-26</sup> | 40.633                        |
| Urokinase plasminogen activator surface receptor                  | Q03405            | -0.33               | 1.17x10 <sup>-25</sup> | 36.978                        |
| Tumor necrosis factor receptor superfamily member EDAR            | Q9UNE0            | -0.33               | 3.60x10 <sup>-25</sup> | 48.582                        |
| Interleukin-19                                                    | Q9UHD0            | 0.33                | 5.40x10 <sup>-25</sup> | 20.452                        |
| Interleukin-16                                                    | Q14005            | -0.33               | 1.23x10 <sup>-24</sup> | 141.752                       |
| Tumor necrosis factor receptor superfamily member 9               | Q07011            | -0.33               | 1.29x10 <sup>-24</sup> | 27.899                        |

| <b>Protein</b>                                            | <b>UniProt ID</b> | <b>Spearman rho</b> | <b>p-value</b>         | <b>Molecular Weight (kDa)</b> |
|-----------------------------------------------------------|-------------------|---------------------|------------------------|-------------------------------|
| gp41 C34 peptide, HIV                                     | Q70626            | -0.32               | 2.84x10 <sup>-24</sup> | 96.938                        |
| Ficolin-3                                                 | O75636            | 0.32                | 4.56x10 <sup>-24</sup> | 32903                         |
| Angiostatin                                               | P00747            | 0.32                | 5.15x10 <sup>-24</sup> | 90.569                        |
| Vascular endothelial growth factor A                      | P15692            | -0.32               | 1.72x10 <sup>-23</sup> | 27.042                        |
| Matrilin-2                                                | O00339            | -0.32               | 2.73x10 <sup>-23</sup> | 106.837                       |
| NudC domain-containing protein 3                          | Q8IVD9            | -0.31               | 7.58x10 <sup>-23</sup> | 40.822                        |
| Pancreatic hormone                                        | P01298            | -0.31               | 1.44x10 <sup>-22</sup> | 10.445                        |
| 6-phosphogluconate dehydrogenase, decarboxylating         | P52209            | 0.31                | 1.86x10 <sup>-22</sup> | 53.140                        |
| SHC-transforming protein 1                                | P29353            | -0.31               | 2.68x10 <sup>-22</sup> | 62.822                        |
| Proto-oncogene tyrosine-protein kinase receptor Ret       | P07949            | 0.31                | 2.80x10 <sup>-22</sup> | 124.319                       |
| OX-2 membrane glycoprotein                                | P41217            | -0.31               | 3.21x10 <sup>-22</sup> | 31.264                        |
| Ephrin type-A receptor 1                                  | P21709            | -0.31               | 8.34x10 <sup>-22</sup> | 108.127                       |
| Agouti-related protein                                    | O00253            | -0.31               | 1.16x10 <sup>-21</sup> | 14.440                        |
| Ubiquitin-fold modifier-conjugating enzyme 1              | Q9Y3C8            | -0.3                | 1.88x10 <sup>-21</sup> | 19.458                        |
| Neurexophilin-1                                           | P58417            | 0.3                 | 3.94x10 <sup>-21</sup> | 31.082                        |
| Interleukin-18-binding protein                            | O95998            | -0.3                | 9.17x10 <sup>-21</sup> | 21.099                        |
| Trypsin-2                                                 | P07478            | -0.3                | 1.04x10 <sup>-20</sup> | 26.488                        |
| Platelet glycoprotein VI                                  | Q9HCN6            | -0.3                | 1.19x10 <sup>-20</sup> | 36.866                        |
| Fibroblast growth factor receptor 1                       | P11362            | -0.3                | 1.39x10 <sup>-20</sup> | 91.868                        |
| Cryptic protein                                           | P0CG37            | -0.29               | 5.14x10 <sup>-20</sup> | 24.612                        |
| Superoxide dismutase [Mn], mitochondrial                  | P04179            | 0.29                | 1.74x10 <sup>-19</sup> | 24.750                        |
| Creatine kinase M-type:Creatine kinase B-type heterodimer | P12277<br>P06732  | 0.29                | 2.83x10 <sup>-19</sup> | 42.644                        |

| Protein                                    | UniProt ID | Spearman rho | p-value                | Molecular Weight (kDa) |
|--------------------------------------------|------------|--------------|------------------------|------------------------|
| C-C motif chemokine 18                     | P55774     | -0.29        | 5.46x10 <sup>-19</sup> | 9.849                  |
| Junctional adhesion molecule C             | Q9BX67     | -0.28        | 8.00x10 <sup>-19</sup> | 35.020                 |
| Follistatin                                | P19883     | -0.28        | 2.04x10 <sup>-18</sup> | 38.007                 |
| Ephrin type-B receptor 2                   | P29323     | -0.28        | 2.58x10 <sup>-18</sup> | 117.493                |
| Metalloproteinase inhibitor 3              | P35625     | 0.28         | 3.55x10 <sup>-18</sup> | 24.145                 |
| Malate dehydrogenase, cytoplasmic          | P40925     | 0.28         | 5.64x10 <sup>-18</sup> | 36.426                 |
| Vascular endothelial growth factor C       | P49767     | -0.28        | 5.67x10 <sup>-18</sup> | 46.883                 |
| Lysozyme C                                 | P61626     | -0.28        | 6.48x10 <sup>-18</sup> | 16.537                 |
| Alcohol dehydrogenase [NADP(+)]            | P14550     | -0.28        | 7.46x10 <sup>-18</sup> | 36.573                 |
| Aminoacylase-1                             | Q03154     | 0.28         | 7.65x10 <sup>-18</sup> | 45.885                 |
| Phosphatidylethanolamine-binding protein 1 | P30086     | -0.28        | 8.69x10 <sup>-18</sup> | 21.057                 |
| Thrombospondin-4                           | P35443     | -0.28        | 8.85x10 <sup>-18</sup> | 105.869                |
| Neurogenic locus notch homolog protein 3   | Q9UM47     | -0.27        | 1.30x10 <sup>-17</sup> | 243.631                |
| Mitogen-activated protein kinase 11        | Q15759     | -0.27        | 1.41x10 <sup>-17</sup> | 41.357                 |
| SLAM family member 5                       | Q9UIB8     | -0.27        | 1.77x10 <sup>-17</sup> | 38.782                 |
| Plasminogen                                | P00747     | 0.27         | 4.34x10 <sup>-17</sup> | 90.569                 |
| Complement factor B                        | P00751     | 0.27         | 4.61x10 <sup>-17</sup> | 85.533                 |
| Cathepsin Z                                | Q9UBR2     | -0.27        | 6.60x10 <sup>-17</sup> | 33.868                 |
| Stromelysin-1                              | P08254     | -0.27        | 9.69x10 <sup>-17</sup> | 53.977                 |
| Dickkopf-related protein 3                 | Q9UBP4     | -0.27        | 1.52x10 <sup>-16</sup> | 38.390                 |
| 14-3-3 protein sigma                       | P31947     | -0.26        | 2.39x10 <sup>-16</sup> | 27.774                 |
| Mitogen-activated protein kinase 12        | P53778     | -0.26        | 3.64x10 <sup>-16</sup> | 41.940                 |
| C-type lectin domain family 4 member M     | Q9H2X3     | 0.26         | 3.75x10 <sup>-16</sup> | 45.350                 |



| Protein                                                              | UniProt ID | Spearman rho | p-value                | Molecular Weight (kDa) |
|----------------------------------------------------------------------|------------|--------------|------------------------|------------------------|
| Growth hormone receptor                                              | P10912     | 0.26         | 4.67x10 <sup>-16</sup> | 30.120                 |
| Tumor necrosis factor receptor superfamily member 4                  | P43489     | -0.26        | 5.87x10 <sup>-16</sup> | 29.341                 |
| Reticulon-4 receptor                                                 | Q9BZR6     | -0.26        | 6.17x10 <sup>-16</sup> | 50.708                 |
| Legumain                                                             | Q99538     | 0.26         | 1.15x10 <sup>-15</sup> | 49.411                 |
| Brain-specific serine protease 4                                     | Q9GZN4     | -0.26        | 1.17x10 <sup>-15</sup> | 33.732                 |
| Glypican-3                                                           | P51654     | 0.26         | 1.54x10 <sup>-15</sup> | 65.563                 |
| Interleukin-17F                                                      | Q96PD4     | -0.26        | 1.97x10 <sup>-15</sup> | 18.045                 |
| Cadherin-3                                                           | P22223     | 0.26         | 2.13x10 <sup>-15</sup> | 86.552                 |
| Fibroblast growth factor 7                                           | P21781     | -0.25        | 5.59x10 <sup>-15</sup> | 22.509                 |
| Trypsin-1                                                            | P07477     | -0.25        | 5.71x10 <sup>-15</sup> | 26.558                 |
| Annexin A1                                                           | P04083     | -0.25        | 6.34x10 <sup>-15</sup> | 38.714                 |
| Low affinity immunoglobulin epsilon Fc receptor                      | P06734     | -0.25        | 7.51x10 <sup>-15</sup> | 36.469                 |
| T-cell surface glycoprotein CD4                                      | P01730     | -0.25        | 1.33x10 <sup>-14</sup> | 51.111                 |
| Ectonucleoside triphosphate diphosphohydrolase 5                     | O75356     | 0.25         | 1.80x10 <sup>-14</sup> | 47.517                 |
| Tumor necrosis factor receptor superfamily member 14                 | Q92956     | -0.25        | 2.02x10 <sup>-14</sup> | 30.392                 |
| Complement component 1 Q subcomponent-binding protein, mitochondrial | Q07021     | 0.24         | 4.71x10 <sup>-14</sup> | 31.362                 |
| Afamin                                                               | P43652     | 0.24         | 6.25x10 <sup>-14</sup> | 69.069                 |
| Mannan-binding lectin serine protease 1                              | P48740     | 0.24         | 6.32x10 <sup>-14</sup> | 79.247                 |
| Periostin                                                            | Q15063     | -0.24        | 7.65x10 <sup>-14</sup> | 93.314                 |
| Ficolin-2                                                            | Q15485     | 0.24         | 8.52x10 <sup>-14</sup> | 34.001                 |
| Repulsive guidance molecule A                                        | Q96B86     | -0.24        | 8.79x10 <sup>-14</sup> | 49.347                 |
| Beta-Ala-His dipeptidase                                             | Q96KN2     | 0.24         | 9.70x10 <sup>-14</sup> | 56.706                 |

| <b>Protein</b>                                                         | <b>UniProt ID</b> | <b>Spearman rho</b> | <b>p-value</b>         | <b>Molecular Weight (kDa)</b> |
|------------------------------------------------------------------------|-------------------|---------------------|------------------------|-------------------------------|
| Mast/stem cell growth factor receptor Kit                              | P10721            | 0.24                | 1.34x10 <sup>-13</sup> | 109.865                       |
| Gelsolin                                                               | P06396            | -0.24               | 1.35x10 <sup>-13</sup> | 85.698                        |
| Stanniocalcin-1                                                        | P52823            | -0.24               | 1.47x10 <sup>-13</sup> | 27.621                        |
| Netrin-4                                                               | Q9HB63            | 0.24                | 1.66x10 <sup>-13</sup> | 70.071                        |
| Spondin-1                                                              | Q9HCB6            | -0.24               | 1.81x10 <sup>-13</sup> | 90.973                        |
| Serine/threonine-protein kinase 17B                                    | O94768            | 0.24                | 2.66x10 <sup>-13</sup> | 42.344                        |
| Prothrombin                                                            | P00734            | 0.24                | 3.02x10 <sup>-13</sup> | 70.037                        |
| Testican-1                                                             | Q08629            | 0.23                | 3.67x10 <sup>-13</sup> | 49.124                        |
| Protein DJ-1                                                           | Q99497            | -0.23               | 4.90x10 <sup>-13</sup> | 19.891                        |
| Cell adhesion molecule 1                                               | Q9BY67            | -0.23               | 4.93x10 <sup>-13</sup> | 48.509                        |
| NSFL1 cofactor p47                                                     | Q9UNZ2            | -0.23               | 5.11x10 <sup>-13</sup> | 40.573                        |
| C-C motif chemokine 3                                                  | P10147            | -0.23               | 8.05x10 <sup>-13</sup> | 10.085                        |
| Glyceraldehyde-3-phosphate dehydrogenase                               | P04406            | 0.23                | 1.21x10 <sup>-12</sup> | 36.053                        |
| Vascular endothelial growth factor receptor 3                          | P35916            | 0.23                | 1.34x10 <sup>-12</sup> | 152.757                       |
| Natural cytotoxicity triggering receptor 1                             | O76036            | -0.23               | 1.46x10 <sup>-12</sup> | 34.481                        |
| Troponin I, cardiac muscle                                             | P19429            | -0.23               | 1.75x10 <sup>-12</sup> | 24.008                        |
| Endothelial monocyte-activating polypeptide 2                          | Q12904            | 0.23                | 2.59x10 <sup>-12</sup> | 34.353                        |
| Neuroigin-4, X-linked                                                  | Q8N0W4            | -0.23               | 2.66x10 <sup>-12</sup> | 91.915                        |
| Ubiquitin-fold modifier 1                                              | P61960            | -0.22               | 3.72x10 <sup>-12</sup> | 9.118                         |
| Delta-like protein 4                                                   | Q9NR61            | -0.22               | 4.38x10 <sup>-12</sup> | 74.605                        |
| Interleukin-20 receptor subunit alpha                                  | Q9UHF4            | -0.22               | 4.70x10 <sup>-12</sup> | 62.485                        |
| Dickkopf-related protein 4                                             | Q9UBT3            | -0.22               | 6.45x10 <sup>-12</sup> | 24.876                        |
| WAP, Kazal, immunoglobulin, Kunitz and NTR domain-containing protein 2 | Q8TEU8            | -0.22               | 6.68x10 <sup>-12</sup> | 63.941                        |

| Protein                                                          | UniProt ID       | Spearman rho | p-value                | Molecular Weight (kDa) |
|------------------------------------------------------------------|------------------|--------------|------------------------|------------------------|
| Pyruvate kinase PKM                                              | P14618           | 0.22         | 8.91x10 <sup>-12</sup> | 57.937                 |
| Translationally-controlled tumor protein                         | P13693           | -0.22        | 1.36x10 <sup>-11</sup> | 19.595                 |
| Peptide YY                                                       | P10082           | -0.22        | 1.86x10 <sup>-11</sup> | 11.145                 |
| C-C motif chemokine 27                                           | Q9Y4X3           | -0.22        | 2.12x10 <sup>-11</sup> | 12.618                 |
| Cadherin-2                                                       | P19022           | -0.22        | 2.33x10 <sup>-11</sup> | 99.809                 |
| Aflatoxin B1 aldehyde reductase member 2                         | O43488           | 0.22         | 2.63x10 <sup>-11</sup> | 39.589                 |
| 15-hydroxyprostaglandin dehydrogenase [NAD(+)]                   | P15428           | 0.21         | 3.09x10 <sup>-11</sup> | 28.977                 |
| Parathyroid hormone-related protein                              | P12272           | -0.21        | 3.40x10 <sup>-11</sup> | 20.194                 |
| Acid sphingomyelinase-like phosphodiesterase 3a                  | Q92484           | 0.21         | 3.50x10 <sup>-11</sup> | 51.260                 |
| Plasma kallikrein                                                | P03952           | 0.21         | 3.64x10 <sup>-11</sup> | 71.370                 |
| Cyclin-dependent kinase 8:Cyclin-C complex                       | P49336<br>P24863 | 0.21         | 4.12x10 <sup>-11</sup> | 53.284                 |
| Inosine-5'-monophosphate dehydrogenase 2                         | P12268           | 0.21         | 5.67x10 <sup>-11</sup> | 55.805                 |
| Glucagon                                                         | P01275           | -0.21        | 6.32x10 <sup>-11</sup> | 20.909                 |
| Ephrin type-A receptor 5                                         | P54756           | -0.21        | 6.50x10 <sup>-11</sup> | 114.803                |
| Hemojuvelin                                                      | Q6ZVN8           | -0.21        | 6.54x10 <sup>-11</sup> | 45.080                 |
| Dipeptidyl peptidase 2                                           | Q9UHL4           | 0.21         | 6.57x10 <sup>-11</sup> | 54.341                 |
| Drebrin-like protein                                             | Q9UJU6           | 0.21         | 6.58x10 <sup>-11</sup> | 48.207                 |
| A disintegrin and metalloproteinase with thrombospondin motifs 5 | Q9UNA0           | -0.21        | 7.24x10 <sup>-11</sup> | 101.718                |
| Eukaryotic translation initiation factor 4 gamma 2               | P78344           | -0.21        | 1.03x10 <sup>-10</sup> | 102.362                |
| NADPH--cytochrome P450 reductase                                 | P16435           | 0.21         | 1.16x10 <sup>-10</sup> | 76.690                 |
| Carbonic anhydrase-related protein 10                            | Q9NS85           | 0.21         | 1.38x10 <sup>-10</sup> | 37.563                 |

| <b>Protein</b>                                   | <b>UniProt ID</b> | <b>Spearman rho</b> | <b>p-value</b>         | <b>Molecular Weight (kDa)</b> |
|--------------------------------------------------|-------------------|---------------------|------------------------|-------------------------------|
| Tyrosine-protein phosphatase non-receptor type 1 | P18031            | 0.21                | 1.39x10 <sup>-10</sup> | 49.967                        |
| Programmed cell death 1 ligand 2                 | Q9BQ51            | -0.21               | 1.44x10 <sup>-10</sup> | 30.957                        |
| Tyrosine-protein kinase Yes                      | P07947            | -0.21               | 1.61x10 <sup>-10</sup> | 60.801                        |
| CD48 antigen                                     | P09326            | -0.21               | 2.28x10 <sup>-10</sup> | 19.429                        |
| Alpha-2-HS-glycoprotein                          | P02765            | 0.21                | 2.30x10 <sup>-10</sup> | 39.325                        |
| C-C motif chemokine 16                           | O15467            | -0.2                | 2.40x10 <sup>-10</sup> | 13.600                        |
| Coagulation factor Xa                            | P00742            | 0.2                 | 2.52x10 <sup>-10</sup> | 54.732                        |
| Creatine kinase M-type                           | P06732            | 0.2                 | 2.94x10 <sup>-10</sup> | 43.101                        |
| SPARC                                            | P09486            | 0.2                 | 3.00x10 <sup>-10</sup> | 34.632                        |
| Lymphotoxin alpha2:beta1                         | P01374,<br>Q06643 | 0.2                 | 3.24x10 <sup>-10</sup> | 22.297                        |
| Sialic acid-binding Ig-like lectin 14            | Q08ET2            | -0.2                | 3.43x10 <sup>-10</sup> | 43.970                        |
| C-X-C motif chemokine 5                          | P42830            | 0.2                 | 6.05x10 <sup>-10</sup> | 11.972                        |
| Thrombospondin-2                                 | P35442            | -0.2                | 1.01x10 <sup>-09</sup> | 129.991                       |
| Complement factor I                              | P05156            | 0.2                 | 1.10x10 <sup>-09</sup> | 65.750                        |
| Insulin-like growth factor-binding protein 1     | P08833            | -0.2                | 1.13x10 <sup>-09</sup> | 27.904                        |
| Adenylate kinase isoenzyme 1                     | P00568            | 0.2                 | 1.18x10 <sup>-09</sup> | 21.635                        |
| Thyroid Stimulating Hormone                      | P01215<br>P01222  | -0.2                | 1.40x10 <sup>-09</sup> | 13.075                        |
| Ras-related C3 botulinum toxin substrate 1       | P63000            | 0.2                 | 1.73x10 <sup>-09</sup> | 21.450                        |
| Vitamin K-dependent protein C                    | P04070            | 0.2                 | 1.74x10 <sup>-09</sup> | 52.071                        |
| Dickkopf-like protein 1                          | Q9UK85            | 0.19                | 2.19x10 <sup>-09</sup> | 27.007                        |
| Protein kinase B alpha/beta/gamma                | Family            | 0.19                | 2.62x10 <sup>-09</sup> | 55.059                        |
| cGMP-dependent 3',5'-cyclic phosphodiesterase    | O00408            | 0.19                | 2.90x10 <sup>-09</sup> | 105.717                       |
| Collectin-11                                     | Q9BWP8            | 0.19                | 3.13x10 <sup>-09</sup> | 28.665                        |

| Protein                                             | UniProt ID                                                               | Spearman rho | p-value                | Molecular Weight (kDa) |
|-----------------------------------------------------|--------------------------------------------------------------------------|--------------|------------------------|------------------------|
| Serine/threonine-protein kinase PAK 7               | Q9P286                                                                   | 0.19         | 3.43x10 <sup>-09</sup> | 80.745                 |
| Complement factor H                                 | P08603                                                                   | 0.19         | 3.69x10 <sup>-09</sup> | 1.231                  |
| Cytochrome P450 3A4                                 | P08684                                                                   | 0.19         | 3.70x10 <sup>-09</sup> | 57.343                 |
| Neurogenic locus notch homolog protein 1            | P46531                                                                   | 0.19         | 4.83x10 <sup>-09</sup> | 272.505                |
| Transketolase                                       | P29401                                                                   | 0.19         | 4.85x10 <sup>-09</sup> | 67.878                 |
| Calcium/calmodulin-dependent protein kinase type 1D | Q8IU85                                                                   | 0.19         | 5.09x10 <sup>-09</sup> | 42.914                 |
| alpha-2-macroglobulin receptor-associated protein   | P30533                                                                   | 0.19         | 5.41x10 <sup>-09</sup> | 41.466                 |
| Angiotensin-related protein 4                       | Q9BY76                                                                   | -0.19        | 5.66x10 <sup>-09</sup> | 45.214                 |
| Plexin-C1                                           | O60486                                                                   | 0.19         | 5.73x10 <sup>-09</sup> | 175.742                |
| Serine protease HTRA2, mitochondrial                | O43464                                                                   | -0.19        | 7.39x10 <sup>-09</sup> | 48.841                 |
| Glycylpeptide N-tetradecanoyltransferase 1          | P30419                                                                   | 0.19         | 7.56x10 <sup>-09</sup> | 56.806                 |
| Stress-induced-phosphoprotein 1                     | P31948                                                                   | 0.19         | 7.87x10 <sup>-09</sup> | 62.639                 |
| 14-3-3 protein family                               | P31946,<br>P62258,<br>P61981,<br>Q04917,<br>P27348,<br>P63104,<br>P31947 | -0.19        | 8.18x10 <sup>-09</sup> | 28.082                 |
| Limbic system-associated membrane protein           | Q13449                                                                   | -0.19        | 1.02x10 <sup>-08</sup> | 37.393                 |
| Probable G-protein coupled receptor 114             | Q8IZF4                                                                   | 0.19         | 1.04x10 <sup>-08</sup> | 59.000                 |
| Protein disulfide-isomerase A3                      | P30101                                                                   | 0.19         | 1.16x10 <sup>-08</sup> | 56.782                 |
| Tartrate-resistant acid phosphatase type 5          | P13686                                                                   | 0.18         | 1.19x10 <sup>-08</sup> | 36.599                 |
| E-Selectin                                          | P16581                                                                   | 0.18         | 1.30x10 <sup>-08</sup> | 66.655                 |
| Triosephosphate isomerase                           | P60174                                                                   | 0.18         | 1.31x10 <sup>-08</sup> | 30.791                 |

| <b>Protein</b>                                                   | <b>UniProt ID</b> | <b>Spearman rho</b> | <b>p-value</b>         | <b>Molecular Weight (kDa)</b> |
|------------------------------------------------------------------|-------------------|---------------------|------------------------|-------------------------------|
| Ectonucleotide pyrophosphatase/phosphodiesterase family member 7 | Q6UWV6            | 0.18                | 1.42x10 <sup>-08</sup> | 51.494                        |
| Chymase                                                          | P23946            | 0.18                | 1.60x10 <sup>-08</sup> | 27.325                        |
| Sialic acid-binding Ig-like lectin 7                             | Q9Y286            | 0.18                | 1.84x10 <sup>-08</sup> | 51.143                        |
| Alanine aminotransferase 1                                       | P24298            | 0.18                | 2.56x10 <sup>-08</sup> | 54.637                        |
| Thrombin                                                         | 00734             | 0.18                | 3.30x10 <sup>-08</sup> | 70.300                        |
| Kin of IRRE-like protein 3                                       | Q8IZU9            | -0.18               | 3.44x10 <sup>-08</sup> | 85.255                        |
| Casein kinase II subunit alpha                                   | P68400            | 0.18                | 3.84x10 <sup>-08</sup> | 45.144                        |
| NKG2-D type II integral membrane protein                         | P26718            | -0.18               | 4.09x10 <sup>-08</sup> | 25.274                        |
| B-cell receptor CD22                                             | P20273            | 0.18                | 4.41x10 <sup>-08</sup> | 95.348                        |
| Fibroblast growth factor 19                                      | O95750            | -0.18               | 4.56x10 <sup>-08</sup> | 24.003                        |
| Platelet endothelial cell adhesion molecule                      | P16284            | 0.18                | 4.91x10 <sup>-08</sup> | 82.522                        |
| Proliferation-associated protein 2G4                             | Q9UQ80            | 0.18                | 4.99x10 <sup>-08</sup> | 43.787                        |
| Aurora kinase B                                                  | Q96GD4            | 0.18                | 5.37x10 <sup>-08</sup> | 39.311                        |
| Hepatoma-derived growth factor-related protein 2                 | Q7Z4V5            | -0.18               | 5.83x10 <sup>-08</sup> | 74.317                        |
| AH receptor-interacting protein                                  | O00170            | 0.17                | 7.26x10 <sup>-08</sup> | 37.636                        |
| Cytokine receptor common subunit gamma                           | P31785            | 0.17                | 7.61x10 <sup>-08</sup> | 42.287                        |
| Intercellular adhesion molecule 1                                | P05362            | 0.17                | 7.98x10 <sup>-08</sup> | 57.825                        |
| Stabilin-2                                                       | Q8WWQ8            | 0.17                | 8.57x10 <sup>-08</sup> | 276.988                       |
| Corticosteroid-binding globulin                                  | P08185            | 0.17                | 9.70x10 <sup>-08</sup> | 45.141                        |
| Kallikrein-14                                                    | Q9P0G3            | 0.17                | 1.01x10 <sup>-07</sup> | 29.122                        |
| Advanced glycosylation end product-specific receptor, soluble    | Q15109            | -0.17               | 1.02x10 <sup>-07</sup> | 42.803                        |
| Fibroblast growth factor 9                                       | P31371            | 0.17                | 1.04x10 <sup>-07</sup> | 23.441                        |

| <b>Protein</b>                               | <b>UniProt ID</b> | <b>Spearman rho</b> | <b>p-value</b>          | <b>Molecular Weight (kDa)</b> |
|----------------------------------------------|-------------------|---------------------|-------------------------|-------------------------------|
| Rab GDP dissociation inhibitor beta          | P50395            | 0.17                | 1.04x10 <sup>-07</sup>  | 50.663                        |
| Interleukin-4                                | P05112            | 0.17                | 1.13x10 <sup>-07</sup>  | 17.492                        |
| Natural cytotoxicity triggering receptor 3   | O14931            | -0.17               | 1.15x10 <sup>-07</sup>  | 21.593                        |
| GTP-binding nuclear protein Ran              | P62826            | 0.17                | 1.23x10 <sup>-07</sup>  | 24.423                        |
| C-C motif chemokine 3-like 1                 | P16619            | -0.17               | 1.37x10 <sup>-07</sup>  | 10.161                        |
| Kunitz-type protease inhibitor 2             | O43291            | -0.17               | 1.39x10 <sup>-07</sup>  | 28.228                        |
| Fetuin-B                                     | Q9UGM5            | 0.17                | 1.96x10 <sup>-07</sup>  | 42.055                        |
| Galectin-3-binding protein                   | Q08380            | 0.17                | 2.13x10 <sup>-07</sup>  | 65.331                        |
| Seprase                                      | Q12884            | 0.17                | 2.16x10 <sup>-07</sup>  | 87.713                        |
| Complement component C9                      | P02748            | -0.17               | 2.25x10 <sup>-07</sup>  | 63.173                        |
| Eotaxin                                      | P51671            | -0.17               | 2.36 x10 <sup>-07</sup> | 10.732                        |
| C-X-C motif chemokine 13                     | O43927            | -0.17               | 2.67x10 <sup>-07</sup>  | 12.664                        |
| Insulin-like growth factor-binding protein 5 | P24593            | -0.17               | 3.06x10 <sup>-07</sup>  | 30.570                        |
| dCTP pyrophosphatase 1                       | Q9H773            | -0.17               | 3.38x10 <sup>-07</sup>  | 18.681                        |
| Renin                                        | P00797            | -0.17               | 3.39x10 <sup>-07</sup>  | 45.057                        |
| Interleukin-27                               | Q8NEV9<br>Q14213  | -0.16               | 3.97x10 <sup>-07</sup>  | 27.493                        |
| UMP-CMP kinase                               | P30085            | 0.16                | 4.13x10 <sup>-07</sup>  | 22.222                        |
| C-X-C motif chemokine 10                     | P02778            | -0.16               | 4.52x10 <sup>-07</sup>  | 10.881                        |
| Mammaglobin-B                                | O75556            | 0.16                | 5.01x10 <sup>-07</sup>  | 10.884                        |
| Serine/threonine-protein kinase Chk1         | O14757            | 0.16                | 5.05x10 <sup>-07</sup>  | 54.434                        |
| DNA topoisomerase 1                          | P11387            | 0.16                | 5.06x10 <sup>-07</sup>  | 90.726                        |
| Prostaglandin G/H synthase 2                 | P35354            | 0.16                | 5.20x10 <sup>-07</sup>  | 68.996                        |
| Cyclin-dependent kinase 2:Cyclin-A2 complex  | P24941<br>P20248  | 0.16                | 5.31x10 <sup>-07</sup>  | 33.930                        |

| <b>Protein</b>                                                         | <b>UniProt ID</b> | <b>Spearman rho</b> | <b>p-value</b>         | <b>Molecular Weight (kDa)</b> |
|------------------------------------------------------------------------|-------------------|---------------------|------------------------|-------------------------------|
| Heat shock 70 kDa protein 1A/1B                                        | P08107            | -0.16               | 5.46x10 <sup>-07</sup> | 70.052                        |
| Peptidyl-prolyl cis-trans isomerase D                                  | Q08752            | 0.16                | 5.64x10 <sup>-07</sup> | 40.764                        |
| C-C motif chemokine 7                                                  | P80098            | -0.16               | 6.47x10 <sup>-07</sup> | 11.200                        |
| Proto-oncogene tyrosine-protein kinase Src                             | P12931            | 0.16                | 6.75x10 <sup>-07</sup> | 59.835                        |
| Cytoskeleton-associated protein 2                                      | Q8WWK9            | 0.16                | 6.83x10 <sup>-07</sup> | 76.897                        |
| Muellerian-inhibiting factor                                           | P03971            | 0.16                | 7.04x10 <sup>-07</sup> | 59.195                        |
| Interleukin-37                                                         | Q9NZH6            | 0.16                | 7.17x10 <sup>-07</sup> | 24.126                        |
| Brain natriuretic peptide 32                                           | P16860            | -0.16               | 7.75x10 <sup>-07</sup> | 14.726                        |
| Polymeric immunoglobulin receptor                                      | P01833            | 0.16                | 8.71x10 <sup>-07</sup> | 83.284                        |
| Plasminogen activator inhibitor 1                                      | P05121            | 0.16                | 9.10x10 <sup>-07</sup> | 45.060                        |
| Fibroblast growth factor 8 isoform B                                   | P55075            | 0.16                | 9.30x10 <sup>-07</sup> | 26.525                        |
| Tyrosine-protein kinase BTK                                            | Q06187            | 0.16                | 9.64x10 <sup>-07</sup> | 76.281                        |
| Vascular cell adhesion protein 1                                       | P19320            | -0.16               | 9.90x10 <sup>-07</sup> | 81.276                        |
| COMM domain-containing protein 7                                       | Q86VX2            | 0.16                | 1.02x10 <sup>-06</sup> | 22.540                        |
| Coagulation Factor V                                                   | P12259            | 0.16                | 1.22x10 <sup>-06</sup> | 251.703                       |
| Tryptase beta-2                                                        | P20231            | -0.16               | 1.24x10 <sup>-06</sup> | 30.515                        |
| Small glutamine-rich tetratricopeptide repeat-containing protein alpha | O43765            | 0.16                | 1.31x10 <sup>-06</sup> | 34.063                        |
| Stromal cell-derived factor 1                                          | P48061            | -0.16               | 1.34x10 <sup>-06</sup> | 10.666                        |
| Prolactin receptor                                                     | P16471            | -0.16               | 1.40x10 <sup>-06</sup> | 69.506                        |
| Antithrombin-III                                                       | P01008            | 0.16                | 1.41x10 <sup>-06</sup> | 52.602                        |
| 1-phosphatidylinositol 4,5-bisphosphate phosphodiesterase gamma-1      | P19174            | 0.16                | 1.55x10 <sup>-06</sup> | 148.532                       |



| <b>Protein</b>                                     | <b>UniProt ID</b> | <b>Spearman rho</b> | <b>p-value</b>         | <b>Molecular Weight (kDa)</b> |
|----------------------------------------------------|-------------------|---------------------|------------------------|-------------------------------|
| Interleukin-12                                     | P29459,<br>P29460 | 0.16                | 1.73x10 <sup>-06</sup> | 24.874                        |
| Lymphocyte activation gene 3 protein               | P18627            | -0.16               | 1.81x10 <sup>-06</sup> | 57.449                        |
| Heterogeneous nuclear ribonucleoprotein Q          | O60506            | 0.15                | 1.99x10 <sup>-06</sup> | 69.603                        |
| Transcription factor IIIB 90 kDa subunit           | Q92994            | 0.15                | 2.02x10 <sup>-06</sup> | 73.840                        |
| Calcineurin subunit B type 1                       | P63098            | 0.15                | 2.12x10 <sup>-06</sup> | 19.300                        |
| Interferon gamma                                   | P01579            | 0.15                | 2.21x10 <sup>-06</sup> | 19.348                        |
| Matrix metalloproteinase-9                         | P14780            | 0.15                | 2.36x10 <sup>-06</sup> | 78.458                        |
| C-C motif chemokine 5                              | P13501            | 0.15                | 2.64x10 <sup>-06</sup> | 9.990                         |
| Kynureninase                                       | Q16719            | 0.15                | 2.70x10 <sup>-06</sup> | 52.325                        |
| Contactin-4                                        | Q8I WV2           | 0.15                | 2.87x10 <sup>-06</sup> | 113.454                       |
| Serine/threonine-protein kinase 16                 | O75716            | 0.15                | 2.93x10 <sup>-06</sup> | 34.656                        |
| CD5 antigen-like                                   | O43866            | -0.15               | 2.98x10 <sup>-06</sup> | 38.088                        |
| Tumor necrosis factor ligand superfamily member 11 | O14788            | 0.15                | 3.03x10 <sup>-06</sup> | 35.478                        |
| Arginase-1                                         | P05089            | 0.15                | 3.14x10 <sup>-06</sup> | 34.735                        |
| Neutral ceramidase                                 | Q9NR71            | 0.15                | 3.55x10 <sup>-06</sup> | 85.516                        |
| Nucleoside diphosphate kinase B                    | P22392            | 0.15                | 3.71x10 <sup>-06</sup> | 17.298                        |
| Cardiotrophin-1                                    | Q16619            | -0.15               | 3.78x10 <sup>-06</sup> | 21.227                        |
| Interleukin-13 receptor subunit alpha-1            | P78552            | -0.15               | 3.85x10 <sup>-06</sup> | 48.760                        |
| Tyrosine-protein kinase receptor Tie-1, soluble    | P35590            | 0.15                | 3.87x10 <sup>-06</sup> | 125.090                       |
| Bone sialoprotein 2                                | P21815            | -0.15               | 4.03x10 <sup>-06</sup> | 35.148                        |
| beta-adrenergic receptor kinase 1                  | P25098            | 0.15                | 4.03x10 <sup>-06</sup> | 79.574                        |
| Copine-1                                           | Q99829            | 0.15                | 4.08x10 <sup>-06</sup> | 59.059                        |

| <b>Protein</b>                                                          | <b>UniProt ID</b> | <b>Spearman rho</b> | <b>p-value</b>         | <b>Molecular Weight (kDa)</b> |
|-------------------------------------------------------------------------|-------------------|---------------------|------------------------|-------------------------------|
| Tyrosine-protein phosphatase non-receptor type 11                       | Q06124            | -0.15               | 4.27x10 <sup>-06</sup> | 68.436                        |
| RNA-binding protein 39                                                  | Q14498            | -0.15               | 4.45x10 <sup>-06</sup> | 59.380                        |
| Kininogen-1                                                             | P01042            | 0.15                | 4.66x10 <sup>-06</sup> | 71.957                        |
| Prostate-specific antigen                                               | P07288            | -0.15               | 4.81x10 <sup>-06</sup> | 28.741                        |
| Cytokine receptor-like factor 2                                         | Q9HC73            | 0.15                | 5.20x10 <sup>-06</sup> | 42.013                        |
| Mitogen-activated protein kinase 14                                     | Q16539            | 0.15                | 5.27x10 <sup>-06</sup> | 41.293                        |
| Extracellular matrix protein 1                                          | Q16610            | 0.15                | 5.69x10 <sup>-06</sup> | 60.674                        |
| Casein kinase II 2-alpha:2-beta heterotetramer                          | P68400<br>P67870  | 0.15                | 6.07x10 <sup>-06</sup> | 45.144                        |
| Protein FAM107B                                                         | Q9H098            | 0.15                | 6.17x10 <sup>-06</sup> | 15.558                        |
| Calpastatin                                                             | P20810            | 0.15                | 6.67x10 <sup>-06</sup> | 76.573                        |
| Tyrosine-protein kinase CSK                                             | P41240            | 0.15                | 6.67x10 <sup>-06</sup> | 50.704                        |
| Endothelial cell-specific molecule 1                                    | Q9NQ30            | -0.15               | 6.79x10 <sup>-06</sup> | 20.095                        |
| Heat shock protein HSP 90-alpha/beta                                    | P07900<br>P08238  | 0.15                | 6.81x10 <sup>-06</sup> | 84.660                        |
| Complement C1s subcomponent                                             | P09871            | 0.15                | 7.05x10 <sup>-06</sup> | 76.684                        |
| Cyclin-dependent kinase 5:Cyclin-dependent kinase 5 activator 1 complex | Q00535<br>Q15078  | 0.15                | 7.23x10 <sup>-06</sup> | 33.304                        |
| Glutamate carboxypeptidase 2                                            | Q04609            | 0.15                | 8.15x10 <sup>-06</sup> | 84.331                        |
| Mitochondrial import inner membrane translocase subunit TIM14           | Q96DA6            | 0.14                | 8.51x10 <sup>-06</sup> | 12.499                        |
| Angiopoietin-2                                                          | O15123            | -0.14               | 9.37x10 <sup>-06</sup> | 56.919                        |
| Complement component C6                                                 | P13671            | 0.14                | 1.13x10 <sup>-05</sup> | 104.786                       |
| High mobility group protein B1                                          | P09429            | 0.14                | 1.14x10 <sup>-05</sup> | 24.894                        |
| Importin subunit beta-1                                                 | Q14974            | 0.14                | 1.16x10 <sup>-05</sup> | 97.170                        |
| Ubiquitin-conjugating enzyme E2 N                                       | P61088            | 0.14                | 1.20x10 <sup>-05</sup> | 17.138                        |

| <b>Protein</b>                                                  | <b>UniProt ID</b> | <b>Spearman rho</b> | <b>p-value</b>         | <b>Molecular Weight (kDa)</b> |
|-----------------------------------------------------------------|-------------------|---------------------|------------------------|-------------------------------|
| Calpain I                                                       | P07384<br>P04632  | 0.14                | 1.22x10 <sup>-05</sup> | 81.890                        |
| Dual specificity mitogen-activated protein kinase kinase 1      | Q02750            | -0.14               | 1.33x10 <sup>-05</sup> | 43.439                        |
| Tumor necrosis factor receptor superfamily member 17            | Q02223            | -0.14               | 1.37x10 <sup>-05</sup> | 20.165                        |
| Artemin                                                         | Q5T4W7            | 0.14                | 1.42x10 <sup>-05</sup> | 22.878                        |
| Amphiregulin                                                    | P15514            | 0.14                | 1.46x10 <sup>-05</sup> | 27.895                        |
| Macrophage migration inhibitory factor                          | P14174            | -0.14               | 1.59x10 <sup>-05</sup> | 12.476                        |
| Serotransferrin                                                 | P02787            | 0.14                | 1.62x10 <sup>-05</sup> | 77.064                        |
| Death-associated protein kinase 2                               | Q9UIK4            | -0.14               | 1.63x10 <sup>-05</sup> | 42.898                        |
| Cyclin-dependent kinase 1:G2/mitotic-specific cyclin-B1 complex | P06493<br>P14635  | 0.14                | 1.65x10 <sup>-05</sup> | 34.095                        |
| Properdin                                                       | P27918            | 0.14                | 1.70x10 <sup>-05</sup> | 51.276                        |
| C-C motif chemokine 24                                          | O00175            | 0.14                | 1.71x10 <sup>-05</sup> | 13.134                        |
| Tyrosine-protein kinase ZAP-70                                  | P43403            | 0.14                | 1.90x10 <sup>-05</sup> | 69.872                        |
| CD70 antigen                                                    | P32970            | -0.14               | 2.03x10 <sup>-05</sup> | 21.118                        |
| Chromobox protein homolog 5                                     | P45973            | 0.14                | 2.07x10 <sup>-05</sup> | 22.225                        |
| BDNF/NT-3 growth factors receptor                               | Q16620            | 0.14                | 2.19x10 <sup>-05</sup> | 91.999                        |
| cAMP-specific 3',5'-cyclic phosphodiesterase 4D                 | Q08499            | 0.14                | 2.27x10 <sup>-05</sup> | 91.115                        |
| Phospholipase A2                                                | P04054            | -0.14               | 2.27x10 <sup>-05</sup> | 16.360                        |
| Methionine aminopeptidase 1                                     | P53582            | 0.14                | 2.28x10 <sup>-05</sup> | 43.215                        |
| Insulin-degrading enzyme                                        | P14735            | 0.14                | 2.28x10 <sup>-05</sup> | 117.968                       |
| S-formylglutathione hydrolase                                   | P10768            | 0.14                | 2.55x10 <sup>-05</sup> | 31.463                        |
| Macrophage colony-stimulating factor 1                          | P09603            | -0.14               | 2.75x10 <sup>-05</sup> | 60.179                        |

| <b>Protein</b>                                                    | <b>UniProt ID</b> | <b>Spearman rho</b> | <b>p-value</b>         | <b>Molecular Weight (kDa)</b> |
|-------------------------------------------------------------------|-------------------|---------------------|------------------------|-------------------------------|
| Protein NOV homolog                                               | P48745            | -0.14               | 2.88x10 <sup>-05</sup> | 39.162                        |
| Keratin, type I cytoskeletal 18                                   | P05783            | -0.14               | 3.07x10 <sup>-05</sup> | 48.058                        |
| Thyroxine-Binding Globulin                                        | P05543            | 0.14                | 3.18x10 <sup>-05</sup> | 46.325                        |
| Calcium/calmodulin-dependent protein kinase type II subunit delta | Q13557            | 0.14                | 3.34x10 <sup>-05</sup> | 56.369                        |
| Leucine-rich repeats and immunoglobulin-like domains protein 3    | Q6UXM1            | 0.13                | 3.42x10 <sup>-05</sup> | 123.434                       |
| TATA-box-binding protein                                          | P20226            | 0.13                | 3.43x10 <sup>-05</sup> | 37.698                        |
| Kallikrein-5                                                      | Q9Y337            | 0.13                | 3.44x10 <sup>-05</sup> | 32.020                        |
| Protein kinase C beta type (splice variant beta-II)               | P05771            | 0.13                | 3.72x10 <sup>-05</sup> | 76.869                        |
| PSA:alpha-1-antichymotrypsin complex                              | P07288, P01011    | -0.13               | 4.06x10 <sup>-05</sup> | 28.741                        |
| Calcium/calmodulin-dependent protein kinase type 1                | Q14012            | 0.13                | 4.15x10 <sup>-05</sup> | 41.337                        |
| Programmed cell death 1 ligand 1                                  | Q9NZQ7            | -0.13               | 4.20x10 <sup>-05</sup> | 33.275                        |
| Platelet-derived growth factor subunit B                          | P01127            | 0.13                | 4.81x10 <sup>-05</sup> | 27.283                        |
| Annexin A6                                                        | P08133            | 0.13                | 4.88x10 <sup>-05</sup> | 75.873                        |
| von Willebrand factor                                             | P04275            | -0.13               | 5.62x10 <sup>-05</sup> | 309.265                       |
| DNA repair protein RAD51 homolog 1                                | Q06609            | 0.13                | 5.65x10 <sup>-05</sup> | 36.966                        |
| 40S ribosomal protein S3                                          | P23396            | 0.13                | 5.85x10 <sup>-05</sup> | 26.688                        |
| Proteasome activator complex subunit 3                            | P61289            | 0.13                | 5.90x10 <sup>-05</sup> | 29.506                        |
| Fibroblast growth factor 4                                        | P08620            | 0.13                | 5.93x10 <sup>-05</sup> | 22.048                        |
| Glycogen synthase kinase-3 alpha/beta                             | P49840 P49841     | 0.13                | 5.99x10 <sup>-05</sup> | 50.981                        |
| Bone morphogenetic protein 7                                      | P18075            | -0.13               | 6.14x10 <sup>-05</sup> | 49.313                        |
| Angiopoietin-1                                                    | Q15389            | -0.13               | 6.18x10 <sup>-05</sup> | 57.513                        |

| <b>Protein</b>                                                                                       | <b>UniProt ID</b> | <b>Spearman rho</b> | <b>p-value</b>         | <b>Molecular Weight (kDa)</b> |
|------------------------------------------------------------------------------------------------------|-------------------|---------------------|------------------------|-------------------------------|
| Semaphorin-3E                                                                                        | O15041            | -0.13               | 6.22x10 <sup>-05</sup> | 89.228                        |
| Baculoviral IAP repeat-containing protein 5                                                          | O15392            | 0.13                | 6.27x10 <sup>-05</sup> | 16.389                        |
| Tyrosine-protein kinase Lyn                                                                          | P07948            | 0.13                | 6.64x10 <sup>-05</sup> | 58.574                        |
| Semaphorin-3A                                                                                        | Q14563            | 0.13                | 6.68x10 <sup>-05</sup> | 88.889                        |
| Peroxiredoxin-1                                                                                      | Q06830            | 0.13                | 6.72x10 <sup>-05</sup> | 22.110                        |
| Phosphatidylinositol 3,4,5-trisphosphate 3-phosphatase and dual-specificity protein phosphatase PTEN | P60484            | -0.13               | 6.82x10 <sup>-05</sup> | 47.166                        |
| Oxidized low-density lipoprotein receptor 1                                                          | P78380            | -0.13               | 6.85x10 <sup>-05</sup> | 30.959                        |
| Neuropilin-1                                                                                         | O14786            | -0.13               | 6.98x10 <sup>-05</sup> | 103.134                       |
| GDNF family receptor alpha-1                                                                         | P56159            | -0.13               | 7.15x10 <sup>-05</sup> | 51.456                        |
| Estrogen receptor                                                                                    | P03372            | 0.13                | 7.70x10 <sup>-05</sup> | 66.216                        |
| Galectin-2                                                                                           | P05162            | -0.13               | 7.81x10 <sup>-05</sup> | 14.644                        |
| Arylsulfatase B                                                                                      | P15848            | 0.13                | 7.94x10 <sup>-05</sup> | 59.687                        |
| Retinoblastoma-associated protein                                                                    | P06400            | 0.13                | 8.08x10 <sup>-05</sup> | 106.159                       |
| Carbonic anhydrase 1                                                                                 | P00915            | 0.13                | 8.77x10 <sup>-05</sup> | 28.870                        |
| Phosphatidylinositol 4,5-bisphosphate 3-kinase catalytic subunit gamma isoform                       | P48736            | 0.13                | 8.91x10 <sup>-05</sup> | 126.454                       |
| DnaJ homolog subfamily B member 1                                                                    | P25685            | 0.13                | 9.04x10 <sup>-05</sup> | 38.044                        |
| Thyroid peroxidase                                                                                   | P07202            | 0.13                | 9.39x10 <sup>-05</sup> | 102.963                       |
| CD97 antigen                                                                                         | P48960            | 0.13                | 9.91x10 <sup>-05</sup> | 91.869                        |
| Macrophage scavenger receptor types I and II                                                         | P21757            | 0.13                | 9.98x10 <sup>-05</sup> | 49.762                        |
| Intercellular adhesion molecule 3                                                                    | P32942            | 0.13                | 0.000102               | 59.541                        |
| Angiopoietin-related protein 3                                                                       | Q9Y5C1            | 0.13                | 0.000107               | 53.637                        |

| <b>Protein</b>                                     | <b>UniProt ID</b> | <b>Spearman rho</b> | <b>p-value</b> | <b>Molecular Weight (kDa)</b> |
|----------------------------------------------------|-------------------|---------------------|----------------|-------------------------------|
| Proteasome activator complex subunit 1             | Q06323            | 0.13                | 0.000120       | 28.723                        |
| Anterior gradient protein 2 homolog                | O95994            | 0.13                | 0.000120       | 19.979                        |
| Pyridoxal phosphate phosphatase                    | Q96GD0            | 0.13                | 0.000121       | 31.698                        |
| Chitotriosidase-1                                  | Q13231            | -0.12               | 0.000128       | 51.681                        |
| Hepatocyte growth factor receptor                  | P08581            | 0.12                | 0.000130       | 1.390                         |
| Intercellular adhesion molecule 2                  | P13598            | 0.12                | 0.000130       | 30.654                        |
| Lactoperoxidase                                    | P22079            | 0.12                | 0.000132       | 80.288                        |
| Leptin receptor                                    | P48357            | 0.12                | 0.000133       | 132.494                       |
| Apoptosis regulator Bcl-2                          | P10415            | 0.12                | 0.000134       | 26.266                        |
| Heparan-sulfate 6-O-sulfotransferase 1             | O60243            | 0.12                | 0.000141       | 48.226                        |
| Opioid-binding protein/cell adhesion molecule      | Q14982            | 0.12                | 0.000146       | 38.008                        |
| Hepatocyte growth factor-like protein              | P26927            | 0.12                | 0.000147       | 80.320                        |
| Cadherin-5                                         | P33151            | -0.12               | 0.000150       | 87.528                        |
| GTPase KRas                                        | P01116            | 0.12                | 0.000157       | 21.656                        |
| Vascular endothelial growth factor A, isoform 121  | P15692            | 0.12                | 0.000162       | 27.042                        |
| Ephrin-B3                                          | Q15768            | -0.12               | 0.000162       | 35.835                        |
| Cation-independent mannose-6-phosphate receptor    | P11717            | 0.12                | 0.000163       | 274.375                       |
| Interleukin-1 receptor type 1                      | P14778            | -0.12               | 0.000167       | 65.402                        |
| TGF-beta receptor type-2                           | P37173            | 0.12                | 0.000180       | 64.568                        |
| Tumor necrosis factor ligand superfamily member 12 | O43508            | 0.12                | 0.000180       | 27.216                        |
| Protein jagged-1                                   | P78504            | -0.12               | 0.000181       | 133.799                       |
| Tyrosine-protein kinase Lck                        | P06239            | 0.12                | 0.000184       | 58.001                        |

| <b>Protein</b>                                                                                                   | <b>UniProt ID</b> | <b>Spearman rho</b> | <b>p-value</b> | <b>Molecular Weight (kDa)</b> |
|------------------------------------------------------------------------------------------------------------------|-------------------|---------------------|----------------|-------------------------------|
| Peptidoglycan recognition protein 1                                                                              | O75594            | -0.12               | 0.000184       | 21.731                        |
| Collagen alpha-1(XXIII) chain                                                                                    | Q86Y22            | 0.12                | 0.000191       | 51.944                        |
| 3-phosphoinositide-dependent protein kinase 1                                                                    | O15530            | 0.12                | 0.000193       | 63.152                        |
| Neural cell adhesion molecule L1                                                                                 | P32004            | 0.12                | 0.000197       | 140.003                       |
| Thyroglobulin                                                                                                    | P01266            | 0.12                | 0.000202       | 304.790                       |
| Ubiquitin+1, truncated mutation for UbB                                                                          | P62979            | -0.12               | 0.000202       | 17.965                        |
| R-spondin-2                                                                                                      | Q6UXX9            | 0.12                | 0.000204       | 28.315                        |
| Protein kinase C iota type                                                                                       | P41743            | 0.12                | 0.000216       | 68.262                        |
| Ficolin-1                                                                                                        | O00602            | -0.12               | 0.000217       | 35.078                        |
| High affinity cGMP-specific 3',5'-cyclic phosphodiesterase 9A                                                    | O76083            | -0.12               | 0.000226       | 68.493                        |
| Peroxiredoxin-6                                                                                                  | P30041            | 0.12                | 0.000231       | 25.035                        |
| Lymphatic vessel endothelial hyaluronic acid receptor 1                                                          | Q9Y5Y7            | -0.12               | 0.000251       | 35.213                        |
| Interleukin-17A                                                                                                  | Q16552            | 0.12                | 0.000261       | 17.504                        |
| C-C motif chemokine 21                                                                                           | O00585            | 0.12                | 0.000262       | 14.646                        |
| Adenylosuccinate lyase                                                                                           | P30566            | 0.12                | 0.000271       | 54.889                        |
| Growth arrest-specific protein 1                                                                                 | P54826            | -0.12               | 0.000275       | 35.693                        |
| Immunoglobulin D                                                                                                 | P01880            | 0.12                | 0.000276       | 42.353                        |
| Mitogen-activated protein kinase kinase kinase 7:TGF-beta-activated kinase 1 and MAP3K7-binding protein 1 fusion | O43318<br>Q15750  | 0.12                | 0.000278       | 67.196                        |
| Complement component C7                                                                                          | P10643            | -0.12               | 0.000280       | 93.518                        |
| Calcium/calmodulin-dependent protein kinase type II subunit alpha                                                | Q9UQM7            | 0.12                | 0.000280       | 54.088                        |

| Protein                                                      | UniProt ID                 | Spearman rho | p-value  | Molecular Weight (kDa) |
|--------------------------------------------------------------|----------------------------|--------------|----------|------------------------|
| AMP Kinase (alpha2beta2gamma1)                               | P54646<br>O43741<br>P54619 | 0.12         | 0.000281 | 62.320                 |
| Superoxide dismutase [Cu-Zn]                                 | P00441                     | 0.12         | 0.000302 | 15.936                 |
| Growth/differentiation factor 11                             | O95390                     | 0.12         | 0.000314 | 45.091                 |
| interleukin-17 receptor B                                    | Q9NRM6                     | -0.12        | 0.000323 | 55.885                 |
| Catalase                                                     | P04040                     | 0.12         | 0.000330 | 59.756                 |
| Fibroblast growth factor 16                                  | O43320                     | 0.12         | 0.000354 | 23.759                 |
| Complement component C8                                      | P07357,P07358,P07360       | 0.12         | 0.000354 | 65.163                 |
| Tyrosine-protein kinase Lyn, isoform B                       | P07948                     | 0.12         | 0.000376 | 58.574                 |
| Fibroblast growth factor 23                                  | Q9GZV9                     | -0.12        | 0.000377 | 27.954                 |
| Cytosolic non-specific dipeptidase                           | Q96KP4                     | 0.12         | 0.000386 | 52.878                 |
| C-type lectin domain family 1 member B                       | Q9P126                     | -0.12        | 0.000393 | 26.596                 |
| NAD-dependent protein deacetylase sirtuin-2                  | Q8IXJ6                     | 0.12         | 0.000405 | 43.182                 |
| Ras GTPase-activating protein 1                              | P20936                     | 0.12         | 0.000408 | 116.403                |
| Proteasome subunit alpha type-6                              | P60900                     | 0.12         | 0.000408 | 27.399                 |
| Dual specificity tyrosine-phosphorylation-regulated kinase 3 | O43781                     | 0.11         | 0.000435 | 65.714                 |
| Fibrinogen gamma chain                                       | P02679                     | -0.11        | 0.000443 | 51.512                 |
| Calcium/calmodulin-dependent protein kinase kinase 1         | Q8N5S9                     | 0.11         | 0.000445 | 55.735                 |
| Baculoviral IAP repeat-containing protein 7 Isoform beta     | Q96CA5                     | 0.11         | 0.000458 | 32.798                 |
| Cadherin-6                                                   | P55285                     | 0.11         | 0.000465 | 88.309                 |
| Platelet glycoprotein Ib alpha chain                         | P07359                     | -0.11        | 0.000480 | 71.540                 |



| <b>Protein</b>                                           | <b>UniProt ID</b> | <b>Spearman rho</b> | <b>p-value</b> | <b>Molecular Weight (kDa)</b> |
|----------------------------------------------------------|-------------------|---------------------|----------------|-------------------------------|
| Cathepsin B                                              | P07858            | -0.11               | 0.000487       | 37.822                        |
| Importin subunit alpha-1                                 | P52292            | -0.11               | 0.000495       | 57.862                        |
| C-X-C motif chemokine 6                                  | P80162            | -0.11               | 0.000520       | 11.897                        |
| Vacuolar protein sorting-associated protein VTA1 homolog | Q9NP79            | 0.11                | 0.000541       | 33.879                        |
| Protein kinase C alpha type                              | P17252            | 0.11                | 0.000577       | 76.750                        |
| Receptor-type tyrosine-protein kinase FLT3               | P36888            | 0.11                | 0.000586       | 112.903                       |
| Cytochrome c                                             | P99999            | 0.11                | 0.000587       | 11.749                        |
| Asialoglycoprotein receptor 1                            | P07306            | -0.11               | 0.000630       | 33.186                        |
| Ectonucleoside triphosphate diphosphohydrolase 1         | P49961            | 0.11                | 0.000636       | 57.965                        |
| Serine/threonine-protein kinase TBK1                     | Q9UHD2            | 0.11                | 0.000663       | 83.642                        |
| Inhibin beta A chain                                     | P08476            | -0.11               | 0.000675       | 47.442                        |
| Decorin                                                  | P07585            | 0.11                | 0.000729       | 39.747                        |
| Mitochondrial glutamate carrier 2                        | Q9H1K4            | 0.11                | 0.000743       | 33.849                        |
| Serine/threonine-protein kinase receptor R3              | P37023            | 0.11                | 0.000762       | 56.124                        |
| Calreticulin                                             | P27797            | -0.11               | 0.000773       | 48.142                        |
| Fibroblast growth factor 18                              | O76093            | 0.11                | 0.000788       | 23.989                        |
| Sphingosine kinase 1                                     | Q9NYA1            | 0.11                | 0.000793       | 42.518                        |
| Tumor necrosis factor receptor superfamily member 13C    | Q96RJ3            | 0.11                | 0.000793       | 18.864                        |
| Oncostatin-M                                             | P13725            | 0.11                | 0.000818       | 28.484                        |
| GRB2-related adapter protein 2                           | O75791            | 0.11                | 0.000827       | 24.382                        |
| Interleukin-1 Receptor accessory protein                 | Q9NPH3            | 0.11                | 0.000841       | 65.418                        |
| Alpha-soluble NSF attachment protein                     | P54920            | 0.11                | 0.000852       | 33.233                        |

| <b>Protein</b>                                             | <b>UniProt ID</b> | <b>Spearman rho</b> | <b>p-value</b> | <b>Molecular Weight (kDa)</b> |
|------------------------------------------------------------|-------------------|---------------------|----------------|-------------------------------|
| 3-hydroxyacyl-CoA dehydrogenase type-2                     | Q99714            | 0.11                | 0.000866       | 25.984                        |
| Leucine-rich repeat transmembrane neuronal protein 1       | Q86UE6            | 0.11                | 0.000904       | 58.641                        |
| Proprotein convertase subtilisin/kexin type 9              | Q8NBP7            | 0.11                | 0.000955       | 74.286                        |
| Protein E7_HP18                                            | P06788            | 0.11                | 0.00096        | 11.995                        |
| Pulmonary surfactant-associated protein D                  | P35247            | 0.11                | 0.00106        | 37.728                        |
| Ribosome maturation protein SBDS                           | Q9Y3A5            | 0.11                | 0.00109        | 28.764                        |
| Carbonic anhydrase 6                                       | P23280            | 0.11                | 0.00111        | 35.367                        |
| Ubiquitin-conjugating enzyme E2 L3                         | P68036            | 0.11                | 0.00114        | 17.862                        |
| Heterogeneous nuclear ribonucleoproteins A2/B1             | P22626            | -0.11               | 0.00117        | 37.430                        |
| GDNF family receptor alpha-2                               | O00451            | -0.11               | 0.00118        | 51.544                        |
| Interleukin-3 receptor subunit alpha                       | P26951            | 0.11                | 0.00121        | 43.330                        |
| Transforming growth factor-beta-induced protein ig-h3      | Q15582            | 0.1                 | 0.00129        | 74.681                        |
| Macrophage-stimulating protein receptor                    | Q04912            | 0.1                 | 0.00129        | 152.241                       |
| Histone acetyltransferase KAT6A                            | Q92794            | 0.1                 | 0.00133        | 225.028                       |
| Kremen protein 2                                           | Q8NCW0            | 0.1                 | 0.00135        | 48.849                        |
| Leukotriene A-4 hydrolase                                  | P09960            | -0.1                | 0.00138        | 69.285                        |
| Low affinity immunoglobulin gamma Fc region receptor III-B | O75015            | -0.1                | 0.00140        | 26.216                        |
| Interferon alpha-2                                         | P01563            | 0.1                 | 0.00153        | 21.550                        |
| Insulin-like growth factor-binding protein 7               | Q16270            | 0.1                 | 0.00155        | 29.130                        |
| Metalloproteinase inhibitor 2                              | P16035            | 0.1                 | 0.00158        | 24.399                        |

| <b>Protein</b>                                                               | <b>UniProt ID</b> | <b>Spearman rho</b> | <b>p-value</b> | <b>Molecular Weight (kDa)</b> |
|------------------------------------------------------------------------------|-------------------|---------------------|----------------|-------------------------------|
| Kallistatin                                                                  | P29622            | 0.1                 | 0.00165        | 48.542                        |
| C-X-C motif chemokine 16                                                     | Q9H2A7            | -0.1                | 0.00168        | 27.579                        |
| Interleukin-20                                                               | Q9NYY1            | 0.1                 | 0.00170        | 20.072                        |
| Cytokine receptor-like factor 1:Cardiotrophin-like cytokine factor 1 Complex | O75462<br>Q9UBD9  | -0.1                | 0.00171        | 46.302                        |
| Toll-like receptor 4:Lymphocyte antigen 96 complex                           | O00206<br>Q9Y6Y9  | 0.1                 | 0.00176        | 95.680                        |
| Endoplasmic reticulum aminopeptidase 1                                       | Q9NZ08            | 0.1                 | 0.00178        | 107.235                       |
| C-C motif chemokine 28                                                       | Q9NRJ3            | -0.1                | 0.00181        | 14.280                        |
| 3-hydroxy-3-methylglutaryl-coenzyme A reductase                              | P04035            | 0.1                 | 0.00183        | 97.476                        |
| C-C motif chemokine 25                                                       | O15444            | 0.1                 | 0.00189        | 16.609                        |
| Bone morphogenetic protein receptor type-1A                                  | P36894            | -0.1                | 0.00193        | 60.198                        |
| Alpha-(1,3)-fucosyltransferase 5                                             | Q11128            | -0.1                | 0.00193        | 43.008                        |
| Complement C5b-C6 complex                                                    | P01031,P13671     | 0.1                 | 0.00209        | 188.305                       |
| Serum albumin                                                                | P02768            | -0.1                | 0.00209        | 69.367                        |
| Killer cell immunoglobulin-like receptor 3DL2                                | P43630            | 0.1                 | 0.00209        | 50.230                        |
| cAMP-regulated phosphoprotein 19                                             | P56211            | 0.1                 | 0.00212        | 12.323                        |
| A disintegrin and metalloproteinase with thrombospondin motifs 4             | O75173            | 0.1                 | 0.00212        | 90.197                        |
| Ribosomal protein S6 kinase alpha-3                                          | P51812            | 0.1                 | 0.00212        | 83.736                        |
| Tropomyosin alpha-1 chain                                                    | P09493            | 0.1                 | 0.00215        | 32.709                        |
| Cytoplasmic tyrosine-protein kinase BMX                                      | P51813            | 0.1                 | 0.00227        | 78.011                        |
| Creatine kinase B-type                                                       | P12277            | -0.1                | 0.00229        | 42.644                        |

| <b>Protein</b>                                                                 | <b>UniProt ID</b> | <b>Spearman rho</b> | <b>p-value</b> | <b>Molecular Weight (kDa)</b> |
|--------------------------------------------------------------------------------|-------------------|---------------------|----------------|-------------------------------|
| Transforming growth factor beta-3                                              | P10600            | 0.1                 | 0.00231        | 47.328                        |
| [Pyruvate dehydrogenase (acetyl-transferring)] kinase isozyme 1, mitochondrial | Q15118            | 0.1                 | 0.00242        | 49.244                        |
| Protein FAM107A                                                                | O95990            | 0.1                 | 0.00249        | 17.455                        |
| Tropomyosin beta chain                                                         | P07951            | 0.1                 | 0.00254        | 32.851                        |
| T-lymphocyte surface antigen Ly-9                                              | Q9HBG7            | -0.1                | 0.00271        | 72.139                        |
| Collectin-12                                                                   | Q5KU26            | 0.1                 | 0.00275        | 81.515                        |
| Calcium-dependent phospholipase A2                                             | P39877            | 0.1                 | 0.00280        | 15.674                        |
| Cyclin-dependent kinase inhibitor 1B                                           | P46527            | 0.1                 | 0.00284        | 22.073                        |
| cGMP-specific 3',5'-cyclic phosphodiesterase                                   | O76074            | 0.1                 | 0.00300        | 99.985                        |
| OCIA domain-containing protein 1                                               | Q9NX40            | -0.1                | 0.00306        | 27.626                        |
| Breast cancer anti-estrogen resistance protein 3                               | O75815            | 0.1                 | 0.00310        | 92.566                        |
| Platelet-derived growth factor subunit A                                       | P04085            | 0.1                 | 0.00317        | 24.043                        |
| Calcium/calmodulin-dependent protein kinase type II subunit beta               | Q13554            | 0.1                 | 0.00332        | 72.678                        |
| Interleukin-22                                                                 | Q9GZX6            | -0.1                | 0.00334        | 20.011                        |
| Neural cell adhesion molecule L1-like protein                                  | O00533            | 0.1                 | 0.00338        | 135.071                       |
| Growth/differentiation factor 9                                                | O60383            | 0.1                 | 0.00339        | 51.444                        |
| Fibroblast growth factor 10                                                    | O15520            | 0.1                 | 0.00340        | 23.436                        |
| Tyrosine-protein kinase receptor TYRO3                                         | Q06418            | -0.09               | 0.00363        | 96.905                        |
| SLAM family member 6                                                           | Q96DU3            | -0.09               | 0.00363        | 37.345                        |
| Syntaxin-1A                                                                    | Q16623            | 0.09                | 0.00371        | 33.023                        |

| <b>Protein</b>                                    | <b>UniProt ID</b> | <b>Spearman rho</b> | <b>p-value</b> | <b>Molecular Weight (kDa)</b> |
|---------------------------------------------------|-------------------|---------------------|----------------|-------------------------------|
| Cadherin-15                                       | P55291            | 0.09                | 0.00378        | 88.916                        |
| Baculoviral IAP repeat-containing protein 3       | Q13489            | 0.09                | 0.00390        | 68.372                        |
| Interleukin-18 receptor accessory protein         | O95256            | 0.09                | 0.00397        | 68.310                        |
| S-phase kinase-associated protein 1               | P63208            | 0.09                | 0.00413        | 18.658                        |
| Secretin                                          | P09683            | -0.09               | 0.00441        | 13.016                        |
| Granzyme B                                        | P10144            | 0.09                | 0.00464        | 27.716                        |
| Prokineticin-1                                    | P58294            | 0.09                | 0.00468        | 11.715                        |
| Heparin cofactor 2                                | P05546            | 0.09                | 0.00482        | 57.071                        |
| Caspase-3                                         | P42574            | 0.09                | 0.00546        | 31.608                        |
| ADP-ribosyl cyclase/cyclic ADP-ribose hydrolase 2 | Q10588            | 0.09                | 0.00554        | 35.724                        |
| Abelson tyrosine-protein kinase 2                 | P42684            | 0.09                | 0.00557        | 128.343                       |
| C-type mannose receptor 2                         | Q9UBG0            | 0.09                | 0.00558        | 166.674                       |
| Ectodysplasin-A, secreted form                    | Q92838            | 0.09                | 0.00563        | 41.294                        |
| Alpha-1-antitrypsin                               | P01009            | -0.09               | 0.00593        | 46.737                        |
| Mitogen-activated protein kinase 13               | O15264            | 0.09                | 0.00601        | 42.090                        |
| Galectin-8                                        | O00214            | 0.09                | 0.00607        | 35.808                        |
| Contactin-5                                       | O94779            | 0.09                | 0.00625        | 120.686                       |
| Neuronal cell adhesion molecule                   | Q92823            | -0.09               | 0.00634        | 14.890                        |
| Tumor necrosis factor ligand superfamily member 9 | P41273            | 0.09                | 0.00651        | 26.625                        |
| Protein Wnt-7a                                    | O00755            | 0.09                | 0.00661        | 39.005                        |
| CD40 ligand                                       | P29965            | 0.09                | 0.00673        | 29.274                        |
| alpha-S1-casein                                   | P47710            | 0.09                | 0.00680        | 21.671                        |
| Glucokinase regulatory protein                    | Q14397            | -0.09               | 0.00716        | 68.685                        |

| <b>Protein</b>                                        | <b>UniProt ID</b> | <b>Spearman rho</b> | <b>p-value</b> | <b>Molecular Weight (kDa)</b> |
|-------------------------------------------------------|-------------------|---------------------|----------------|-------------------------------|
| Fibroblast growth factor 2                            | P09038            | 0.09                | 0.00720        | 30.770                        |
| Serine/threonine-protein kinase MRCK beta             | Q9Y5S2            | 0.09                | 0.00781        | 194.315                       |
| T-lymphocyte activation antigen CD86                  | P42081            | 0.09                | 0.00836        | 37.682                        |
| Interleukin-1 alpha                                   | P01583            | -0.09               | 0.00850        | 30.607                        |
| Ectonucleoside triphosphate diphosphohydrolase 3      | O75355            | 0.09                | 0.00865        | 59.105                        |
| NT-3 growth factor receptor                           | Q16288            | -0.09               | 0.00880        | 94.428                        |
| CD226 antigen                                         | Q15762            | 0.09                | 0.00900        | 38.614                        |
| Phospholipase A2, membrane associated                 | P14555            | -0.08               | 0.00929        | 16.083                        |
| Methionine aminopeptidase 2                           | P50579            | 0.08                | 0.00933        | 52.892                        |
| Receptor tyrosine-protein kinase erbB-2               | P04626            | 0.08                | 0.00964        | 137.910                       |
| Cathepsin D                                           | P07339            | 0.08                | 0.00969        | 44.552                        |
| Tumor necrosis factor receptor superfamily member 8   | P28908            | -0.08               | 0.00991        | 63.747                        |
| Plasmin                                               | P00747            | 0.08                | 0.0101         | 90.569                        |
| Lipopolysaccharide-binding protein                    | P18428            | -0.08               | 0.0101         | 53.384                        |
| Group 10 secretory phospholipase A2                   | O15496            | 0.08                | 0.0105         | 18.153                        |
| Ciliary Neurotrophic Factor                           | P26441            | 0.08                | 0.0106         | 22.931                        |
| Lysosome membrane protein 2                           | Q14108            | 0.08                | 0.0108         | 54.290                        |
| Matrilin-3                                            | O15232            | 0.08                | 0.0109         | 52.817                        |
| Annexin A2                                            | P07355            | -0.08               | 0.0111         | 38.604                        |
| Osteomodulin                                          | Q99983            | -0.08               | 0.0111         | 49.492                        |
| Killer cell lectin-like receptor subfamily F member 1 | Q9NZS2            | 0.08                | 0.0116         | 26.666                        |
| Tumor necrosis factor ligand superfamily member 18    | Q9UNG2            | 0.08                | 0.0116         | 22.724                        |

| <b>Protein</b>                         | <b>UniProt ID</b>          | <b>Spearman rho</b> | <b>p-value</b> | <b>Molecular Weight (kDa)</b> |
|----------------------------------------|----------------------------|---------------------|----------------|-------------------------------|
| Mesothelin                             | Q13421                     | 0.08                | 0.0120         | 68.986                        |
| Fibroblast growth factor receptor 4    | P22455                     | 0.08                | 0.0125         | 87.954                        |
| Lysosomal protective protein           | P10619                     | 0.08                | 0.0126         | 54.466                        |
| 72 kDa type IV collagenase             | P08253                     | 0.08                | 0.0126         | 73.882                        |
| Neurotrophin-3                         | P20783                     | 0.08                | 0.0133         | 29.355                        |
| Interleukin-13                         | P35225                     | 0.08                | 0.0135         | 15.816                        |
| AMP Kinase (alpha1beta1gamma1)         | Q13131<br>Q9Y478<br>P54619 | 0.08                | 0.0138         | 64.009                        |
| Granzyme H                             | P20718                     | 0.08                | 0.0138         | 27.315                        |
| Somatostatin-28                        | P61278                     | 0.08                | 0.0140         | 12.736                        |
| Kinesin-like protein KIF23             | Q02241                     | 0.08                | 0.0142         | 110.059                       |
| Bone morphogenetic protein 6           | P22004                     | -0.08               | 0.0144         | 57.226                        |
| Serine/threonine-protein kinase Chk2   | O96017                     | 0.08                | 0.0145         | 60.915                        |
| Persephin                              | O60542                     | -0.08               | 0.0146         | 16.600                        |
| Leptin                                 | P41159                     | -0.08               | 0.0148         | 18.641                        |
| Interleukin-7 receptor subunit alpha   | P16871                     | 0.08                | 0.0150         | 51.581                        |
| Discoidin domain-containing receptor 2 | Q16832                     | -0.08               | 0.0151         | 96.736                        |
| Prefoldin subunit 5                    | Q99471                     | -0.08               | 0.0153         | 17.328                        |
| Apolipoprotein E (isoform E3)          | P02649                     | 0.08                | 0.0153         | 36.154                        |
| Apolipoprotein E (isoform E2)          | P02649                     | 0.08                | 0.0157         | 36.154                        |
| Interleukin-17B                        | Q9UHF5                     | 0.08                | 0.0158         | 20.437                        |
| Tyrosine-protein kinase Fgr            | P09769                     | 0.08                | 0.0159         | 59.479                        |
| Fibroblast growth factor 1             | P05230                     | 0.08                | 0.0160         | 17.460                        |
| Glutathione S-transferase A3           | Q16772                     | 0.08                | 0.0166         | 25.302                        |
| C-C motif chemokine 13                 | Q99616                     | 0.08                | 0.0169         | 10.986                        |

| <b>Protein</b>                                                   | <b>UniProt ID</b> | <b>Spearman rho</b> | <b>p-value</b> | <b>Molecular Weight (kDa)</b> |
|------------------------------------------------------------------|-------------------|---------------------|----------------|-------------------------------|
| Dual specificity protein phosphatase 3                           | P51452            | 0.08                | 0.0170         | 20.478                        |
| Proliferating cell nuclear antigen                               | P12004            | -0.08               | 0.0172         | 28.769                        |
| L-Selectin                                                       | P14151            | 0.08                | 0.0173         | 42.187                        |
| C-C motif chemokine 17                                           | Q92583            | -0.08               | 0.0174         | 10.507                        |
| Carboxypeptidase B2                                              | Q96IY4            | 0.08                | 0.0175         | 48.424                        |
| Cysteine-rich secretory protein 3                                | P54108            | 0.08                | 0.0175         | 27.630                        |
| Kallikrein-4                                                     | Q9Y5K2            | 0.08                | 0.0175         | 27.032                        |
| Coactosin-like protein                                           | Q14019            | -0.08               | 0.0177         | 15.945                        |
| Angiotensin-converting enzyme 2                                  | Q9BYF1            | 0.08                | 0.0180         | 92.463                        |
| C-C motif chemokine 20                                           | P78556            | 0.08                | 0.0183         | 10.762                        |
| Protein kinase C theta type                                      | Q04759            | 0.08                | 0.0192         | 81.865                        |
| AT-rich interactive domain-containing protein 3A                 | Q99856            | 0.08                | 0.0194         | 62.889                        |
| Activated Protein C                                              | P04070            | -0.08               | 0.0207         | 52.071                        |
| Macrophage colony-stimulating factor 1 receptor                  | P07333            | -0.08               | 0.0207         | 107.984                       |
| Fibroblast growth factor 6                                       | P10767            | 0.08                | 0.0211         | 22.905                        |
| Prolactin                                                        | P01236            | -0.08               | 0.0214         | 25.876                        |
| Eukaryotic initiation factor 4A-III                              | P38919            | 0.08                | 0.0216         | 46.871                        |
| Cell surface glycoprotein CD200 receptor 1                       | Q8TD46            | 0.08                | 0.0216         | 36.620                        |
| Carboxypeptidase E                                               | P16870            | 0.07                | 0.0220         | 53.151                        |
| Interleukin-27 receptor subunit alpha                            | Q6UWB1            | 0.07                | 0.0220         | 69.474                        |
| A disintegrin and metalloproteinase with thrombospondin motifs 1 | Q9UHI8            | 0.07                | 0.0220         | 105.358                       |
| Thymidylate synthase                                             | P04818            | -0.07               | 0.0225         | 35.716                        |



| <b>Protein</b>                                      | <b>UniProt ID</b> | <b>Spearman rho</b> | <b>p-value</b> | <b>Molecular Weight (kDa)</b> |
|-----------------------------------------------------|-------------------|---------------------|----------------|-------------------------------|
| Macrophage mannose receptor 1                       | P22897            | -0.07               | 0.0232         | 166.012                       |
| C-C motif chemokine 8                               | P80075            | -0.07               | 0.0232         | 11.246                        |
| Serum paraoxonase/arylesterase 1                    | P27169            | 0.07                | 0.0252         | 39.731                        |
| Transmembrane glycoprotein NMB                      | Q14956            | -0.07               | 0.0252         | 63.923                        |
| P-Selectin                                          | P16109            | 0.07                | 0.0257         | 90.834                        |
| Estradiol 17-beta-dehydrogenase 1                   | P14061            | 0.07                | 0.0260         | 34.950                        |
| Interferon lambda-1                                 | Q8IU54            | 0.07                | 0.0262         | 21.898                        |
| Tyrosine-protein phosphatase non-receptor type 2    | P17706            | 0.07                | 0.0263         | 48.473                        |
| Interstitial collagenase                            | P03956            | -0.07               | 0.0266         | 54.007                        |
| Platelet-activating factor acetylhydrolase          | Q13093            | -0.07               | 0.0270         | 50.077                        |
| Tumor necrosis factor receptor superfamily member 3 | P36941            | 0.07                | 0.0277         | 46.709                        |
| Scavenger receptor class F member 2                 | Q96GP6            | 0.07                | 0.0278         | 92.479                        |
| C3a anaphylatoxin des Arginine                      | P01024            | 0.07                | 0.0282         | 187.148                       |
| Elongation factor 1-beta                            | P24534            | 0.07                | 0.0284         | 24.764                        |
| Tissue-type plasminogen activator                   | P00750            | 0.07                | 0.0284         | 62.917                        |
| Leukemia inhibitory factor receptor                 | P42702            | -0.07               | 0.0303         | 123.743                       |
| Complement C3b                                      | P01024            | 0.07                | 0.0316         | 187.148                       |
| Cytotoxic and regulatory T-cell molecule            | O95727            | 0.07                | 0.0324         | 44.641                        |
| alpha-L-iduronidase                                 | P35475            | 0.07                | 0.0327         | 72.670                        |
| Tryptase gamma                                      | Q9NRR2            | 0.07                | 0.0330         | 33.815                        |
| Luteinizing hormone                                 | P01215,<br>P01229 | -0.07               | 0.0331         | 13.075                        |

| <b>Protein</b>                                        | <b>UniProt ID</b> | <b>Spearman rho</b> | <b>p-value</b> | <b>Molecular Weight (kDa)</b> |
|-------------------------------------------------------|-------------------|---------------------|----------------|-------------------------------|
| Leucine carboxyl methyltransferase 1                  | Q9UIC8            | 0.07                | 0.0334         | 38.379                        |
| MAP kinase-activated protein kinase 2                 | P49137            | 0.07                | 0.0342         | 45.568                        |
| Aromatic-L-amino-acid decarboxylase                   | P20711            | 0.07                | 0.0342         | 53.926                        |
| Scavenger receptor cysteine-rich type 1 protein M130  | Q86VB7            | 0.07                | 0.0343         | 125.451                       |
| Neurotrophin-4                                        | P34130            | 0.07                | 0.0343         | 22.427                        |
| Pituitary adenylate cyclase-activating polypeptide 38 | P18509            | 0.07                | 0.0357         | 18.835                        |
| MHC class I polypeptide-related sequence B            | Q29980            | -0.07               | 0.0361         | 42.646                        |
| Cystatin-S                                            | P01036            | -0.07               | 0.0361         | 16.214                        |
| Fibroblast growth factor 12                           | P61328            | 0.07                | 0.0365         | 27.399                        |
| Neutrophil collagenase                                | P22894            | 0.07                | 0.0367         | 53.412                        |
| Granulocyte-macrophage colony-stimulating factor      | P04141            | -0.07               | 0.0369         | 16.295                        |
| beta-nerve growth factor                              | P01138            | -0.07               | 0.0374         | 26.959                        |
| SPARC-like protein 1                                  | Q14515            | -0.07               | 0.0378         | 75.208                        |
| Cystatin-F                                            | O76096            | -0.07               | 0.0380         | 16.454                        |
| Interleukin-34                                        | Q6ZMJ4            | 0.07                | 0.0384         | 27.482                        |
| Tyrosine-protein kinase JAK2                          | O60674            | 0.07                | 0.0385         | 130.674                       |
| C-X-C motif chemokine 11                              | O14625            | -0.07               | 0.0386         | 10.365                        |
| Bcl-2-related protein A1                              | Q16548            | 0.07                | 0.0390         | 20.132                        |
| C-C motif chemokine 2                                 | P13500            | 0.07                | 0.0395         | 11.025                        |
| Interleukin-22 receptor subunit alpha-2               | Q969J5            | 0.07                | 0.0399         | 30.550                        |
| Bcl-2-like protein 1                                  | Q07817            | 0.07                | 0.0405         | 26.049                        |
| Tumor necrosis factor receptor superfamily member 18  | Q9Y5U5            | 0.07                | 0.0407         | 26.000                        |

| <b>Protein</b>                                              | <b>UniProt ID</b> | <b>Spearman rho</b> | <b>p-value</b> | <b>Molecular Weight (kDa)</b> |
|-------------------------------------------------------------|-------------------|---------------------|----------------|-------------------------------|
| Low affinity immunoglobulin gamma Fc region receptor II-a/b | P12318<br>P31994  | -0.07               | 0.0407         | 35.001                        |
| Toll-like receptor 2                                        | O60603            | -0.07               | 0.0414         | 89.838                        |
| Ligand-dependent nuclear receptor corepressor-like protein  | Q8N3X6            | 0.07                | 0.0416         | 66.964                        |
| 3-hydroxyisobutyrate dehydrogenase, mitochondrial           | P31937            | 0.07                | 0.0416         | 35.329                        |
| Receptor tyrosine-protein kinase erbB-4                     | Q15303            | 0.07                | 0.0422         | 146.808                       |
| Secreted frizzled-related protein 3                         | Q92765            | -0.07               | 0.0422         | 36.254                        |
| Tumor necrosis factor receptor superfamily member 10A       | O00220            | 0.07                | 0.0426         | 50.089                        |
| Hsp90 co-chaperone Cdc37                                    | Q16543            | -0.07               | 0.0435         | 44.468                        |
| Thymidine kinase, cytosolic                                 | P04183            | 0.07                | 0.0435         | 25.469                        |
| Matrix metalloproteinase-17                                 | Q9ULZ9            | 0.07                | 0.0442         | 66.653                        |
| Cathepsin E                                                 | P14091            | 0.07                | 0.0442         | 42.794                        |
| Carbonic anhydrase 7                                        | P43166            | 0.07                | 0.0447         | 29.658                        |
| Insulin-like growth factor I                                | P05019            | -0.07               | 0.0453         | 21.841                        |
| Mitogen-activated protein kinase 1                          | P28482            | 0.07                | 0.0455         | 41.390                        |
| Complement C5                                               | P01031            | 0.06                | 0.0470         | 188.305                       |
| Plasma protease C1 inhibitor                                | P05155            | 0.06                | 0.0480         | 55.154                        |
| Glypican-2                                                  | Q8N158            | 0.06                | 0.0489         | 62.830                        |
| Platelet glycoprotein 4                                     | P16671            | 0.06                | 0.0510         | 53.053                        |
| Persulfide dioxygenase ETHE1, mitochondrial                 | O95571            | 0.06                | 0.0519         | 27.873                        |
| Roundabout homolog 3                                        | Q96MS0            | 0.06                | 0.0521         | 148.209                       |
| Interleukin-10                                              | P22301            | 0.06                | 0.0522         | 20.517                        |
| ATP-dependent RNA helicase DDX19B                           | Q9UMR2            | 0.06                | 0.0528         | 53.927                        |

| <b>Protein</b>                                                | <b>UniProt ID</b> | <b>Spearman rho</b> | <b>p-value</b> | <b>Molecular Weight (kDa)</b> |
|---------------------------------------------------------------|-------------------|---------------------|----------------|-------------------------------|
| Enteropeptidase                                               | P98073            | 0.06                | 0.0540         | 112.935                       |
| Amyloid beta A4 protein                                       | P05067            | -0.06               | 0.0555         | 86.943                        |
| Proteasome subunit alpha type-1                               | P25786            | 0.06                | 0.0561         | 29.556                        |
| Bone morphogenetic protein receptor type-2                    | Q13873            | -0.06               | 0.0563         | 115.201                       |
| Angiotensin-1 receptor, soluble                               | Q02763            | 0.06                | 0.0570         | 125.830                       |
| 40S ribosomal protein S7                                      | P62081            | 0.06                | 0.0576         | 22.127                        |
| Protein disulfide-isomerase                                   | P07237            | 0.06                | 0.0576         | 57.116                        |
| NKG2D ligand 1                                                | Q9BZM6            | 0.06                | 0.0581         | 27.997                        |
| Arylsulfatase A                                               | P15289            | 0.06                | 0.0583         | 53.588                        |
| Dynactin subunit 2                                            | Q13561            | 0.06                | 0.0597         | 44.231                        |
| Human Chorionic Gonadotropin                                  | P01215,P01233     | -0.06               | 0.0613         | 13.075                        |
| Acidic leucine-rich nuclear phosphoprotein 32 family member B | Q92688            | -0.06               | 0.0622         | 28.788                        |
| cGMP-inhibited 3',5'-cyclic phosphodiesterase A               | Q14432            | 0.06                | 0.0633         | 124.979                       |
| Sex hormone-binding globulin                                  | P04278            | -0.06               | 0.0658         | 43.779                        |
| Protein jagged-2                                              | Q9Y219            | 0.06                | 0.0692         | 133.367                       |
| Interleukin-23                                                | P29460, Q9NPF7    | 0.06                | 0.0697         | 37.169                        |
| E3 ubiquitin-protein ligase Mdm2                              | Q00987            | 0.06                | 0.0698         | 55.233                        |
| Immunoglobulin alpha Fc receptor                              | P24071            | 0.06                | 0.0701         | 32.265                        |
| Cadherin-1                                                    | P12830            | 0.06                | 0.0702         | 97.456                        |
| Interleukin-12 receptor subunit beta-1                        | P42701            | -0.06               | 0.0712         | 73.109                        |
| Tenascin                                                      | P24821            | 0.06                | 0.0718         | 240.853                       |
| Lactadherin                                                   | Q08431            | -0.06               | 0.0733         | 43.123                        |

| <b>Protein</b>                                                | <b>UniProt ID</b> | <b>Spearman rho</b> | <b>p-value</b> | <b>Molecular Weight (kDa)</b> |
|---------------------------------------------------------------|-------------------|---------------------|----------------|-------------------------------|
| Fibronectin Fragment 4                                        | P02751            | 0.06                | 0.0739         | 262.625                       |
| Roundabout homolog 2                                          | Q9HCK4            | 0.06                | 0.0758         | 151.200                       |
| Serum amyloid A-1 protein                                     | P0DJI8            | -0.06               | 0.0759         | 13.532                        |
| Focal adhesion kinase 1                                       | Q05397            | 0.06                | 0.0778         | 119.233                       |
| Interleukin-17D                                               | Q8TAD2            | 0.06                | 0.0799         | 21.893                        |
| Kunitz-type protease inhibitor 1                              | O43278            | 0.06                | 0.0801         | 58.398                        |
| Proprotein convertase subtilisin/kexin type 7                 | Q16549            | 0.06                | 0.0808         | 86.247                        |
| Vasoactive Intestinal Peptide                                 | P01282            | 0.06                | 0.0809         | 19.169                        |
| Coagulation factor IXab                                       | P00740            | 0.06                | 0.0810         | 51.778                        |
| L-lactate dehydrogenase B chain                               | P07195            | -0.06               | 0.0816         | 36.638                        |
| ICOS ligand                                                   | O75144            | 0.06                | 0.0817         | 33.349                        |
| Disintegrin and metalloproteinase domain-containing protein 9 | Q13443            | -0.06               | 0.0819         | 90.556                        |
| Complement C2                                                 | P06681            | 0.06                | 0.0828         | 83.268                        |
| Seizure 6-like protein 2                                      | Q6UXD5            | 0.06                | 0.0862         | 97.560                        |
| 60 kDa heat shock protein, mitochondrial                      | P10809            | 0.06                | 0.0867         | 61.055                        |
| Tyrosine-protein kinase Tec                                   | P42680            | 0.06                | 0.0870         | 73.581                        |
| Lymphocyte antigen 86                                         | O95711            | -0.06               | 0.0885         | 17.906                        |
| Interleukin-24                                                | Q13007            | 0.06                | 0.0890         | 23.825                        |
| Interleukin-11 receptor subunit alpha                         | Q14626            | -0.06               | 0.0892         | 45.222                        |
| Interleukin-6                                                 | P05231            | -0.06               | 0.0894         | 23.718                        |
| Fibroblast growth factor 8 isoform A                          | P55075            | 0.06                | 0.0912         | 26.525                        |
| Fms-related tyrosine kinase 3 ligand                          | P49771            | 0.06                | 0.0915         | 26.416                        |
| Fibronectin                                                   | P02751            | 0.05                | 0.0950         | 262.625                       |

| <b>Protein</b>                                   | <b>UniProt ID</b> | <b>Spearman rho</b> | <b>p-value</b> | <b>Molecular Weight (kDa)</b> |
|--------------------------------------------------|-------------------|---------------------|----------------|-------------------------------|
| Iduronate 2-sulfatase                            | P22304            | 0.05                | 0.0969         | 61.873                        |
| Insulin receptor                                 | P06213            | -0.05               | 0.0969         | 156.333                       |
| Epiregulin                                       | O14944            | 0.05                | 0.0973         | 19.044                        |
| Interleukin-6 receptor subunit beta              | P40189            | 0.05                | 0.0979         | 103.537                       |
| Hepcidin                                         | P81172            | -0.05               | 0.102          | 9.408                         |
| Brother of CDO                                   | Q9BWV1            | 0.05                | 0.102          | 121.509                       |
| Thioredoxin domain-containing protein 12         | O95881            | 0.05                | 0.103          | 19.206                        |
| Ubiquitin carboxyl-terminal hydrolase isozyme L1 | P09936            | 0.05                | 0.104          | 24.824                        |
| Myeloid cell surface antigen CD33                | P20138            | -0.05               | 0.105          | 39.825                        |
| C-type lectin domain family 7 member A           | Q9BXN2            | -0.05               | 0.106          | 27.627                        |
| Protein Rev_HV2BE                                | P18093            | 0.05                | 0.106          | 11.792                        |
| Galectin-4                                       | P56470            | 0.05                | 0.107          | 35.941                        |
| Cytotoxic T-lymphocyte protein 4                 | P16410            | 0.05                | 0.111          | 24.656                        |
| Nuclear receptor subfamily 1 group D member 1    | P20393            | 0.05                | 0.112          | 66.805                        |
| VPS10 domain-containing receptor SorCS2          | Q96PQ0            | 0.05                | 0.113          | 128.152                       |
| Inducible T-cell costimulator                    | Q9Y6W8            | 0.05                | 0.113          | 22.625                        |
| Interleukin-3                                    | P08700            | 0.05                | 0.113          | 17.233                        |
| Complement C3d fragment                          | P01024            | 0.05                | 0.114          | 187.148                       |
| NKG2D ligand 2                                   | Q9BZM5            | 0.05                | 0.115          | 27.368                        |
| Erythropoietin                                   | P01588            | -0.05               | 0.115          | 21.307                        |
| Ephrin type-A receptor 10                        | Q5JZY3            | -0.05               | 0.116          | 109.716                       |
| Histone H2A.z                                    | P0C0S5            | -0.05               | 0.116          | 13.553                        |
| Desert hedgehog protein N-product                | O43323            | 0.05                | 0.122          | 43.577                        |

| <b>Protein</b>                                                    | <b>UniProt ID</b> | <b>Spearman rho</b> | <b>p-value</b> | <b>Molecular Weight (kDa)</b> |
|-------------------------------------------------------------------|-------------------|---------------------|----------------|-------------------------------|
| Immunoglobulin G                                                  | P01857            | -0.05               | 0.122          | 36.106                        |
| Caspase-2                                                         | P42575            | 0.05                | 0.127          | 50.685                        |
| Killer cell immunoglobulin-like receptor 3DS1                     | Q14943            | 0.05                | 0.128          | 42.475                        |
| CD109 antigen                                                     | Q6YHK3            | -0.05               | 0.133          | 161.689                       |
| Interleukin-23 receptor                                           | Q5VWK5            | 0.05                | 0.134          | 71.722                        |
| C-C motif chemokine 4-like                                        | Q8NHW4            | -0.05               | 0.134          | 10.166                        |
| Coagulation factor IX                                             | P00740            | 0.05                | 0.134          | 51.778                        |
| Gro-beta/gamma                                                    | P19876<br>P19875  | 0.05                | 0.134          | 11.342                        |
| Dynein light chain roadblock-type 1                               | Q9NP97            | 0.05                | 0.135          | 10.922                        |
| Protein kinase C delta type                                       | Q05655            | -0.05               | 0.136          | 77.505                        |
| Methyl-CpG-binding domain protein 4                               | O95243            | 0.05                | 0.137          | 66.051                        |
| Kallikrein-12                                                     | Q9UKR0            | 0.05                | 0.139          | 26.734                        |
| Dynein light chain 1, cytoplasmic                                 | P63167            | 0.05                | 0.139          | 10.366                        |
| C-C motif chemokine 22                                            | O00626            | 0.05                | 0.141          | 10.625                        |
| Interleukin-12 receptor subunit beta-2                            | Q99665            | -0.05               | 0.142          | 97.135                        |
| Corticotropin                                                     | P01189            | -0.05               | 0.143          | 29.424                        |
| Carbohydrate sulfotransferase 6                                   | Q9GZX3            | 0.05                | 0.145          | 44.099                        |
| Proteasome subunit alpha type-2                                   | P25787            | -0.05               | 0.148          | 25.899                        |
| Midkine                                                           | P21741            | -0.05               | 0.150          | 15.585                        |
| Interleukin-7                                                     | P13232            | 0.05                | 0.150          | 20.187                        |
| A disintegrin and metalloproteinase with thrombospondin motifs 15 | Q8TE58            | -0.05               | 0.151          | 103.287                       |
| GDNF family receptor alpha-3                                      | O60609            | 0.05                | 0.153          | 44.511                        |

| <b>Protein</b>                                                         | <b>UniProt ID</b> | <b>Spearman rho</b> | <b>p-value</b> | <b>Molecular Weight (kDa)</b> |
|------------------------------------------------------------------------|-------------------|---------------------|----------------|-------------------------------|
| Matrix extracellular phosphoglycoprotein                               | Q9NQ76            | 0.05                | 0.156          | 58.419                        |
| Dual specificity mitogen-activated protein kinase kinase 4             | P45985            | 0.05                | 0.157          | 44.288                        |
| Complement C4b                                                         | P0C0L4<br>P0C0L5  | 0.05                | 0.160          | 192.785                       |
| Low-density lipoprotein receptor-related protein 8                     | Q14114            | -0.05               | 0.163          | 105.634                       |
| Growth/differentiation factor 2                                        | Q9UK05            | 0.05                | 0.166          | 47.320                        |
| Pescadillo homolog                                                     | O00541            | 0.05                | 0.166          | 68.003                        |
| Haptoglobin                                                            | P00738            | -0.05               | 0.168          | 45.205                        |
| WAP, kazal, immunoglobulin, kunitz and NTR domain-containing protein 1 | Q96NZ8            | 0.04                | 0.170          | 58.798                        |
| Eukaryotic translation initiation factor 5                             | P55010            | -0.04               | 0.174          | 49.223                        |
| Disintegrin and metalloproteinase domain-containing protein 12         | O43184            | 0.04                | 0.175          | 99.542                        |
| Hemopexin                                                              | P02790            | -0.04               | 0.176          | 51.676                        |
| Neutrophil-activating peptide 2                                        | P02775            | 0.04                | 0.177          | 13.894                        |
| Transforming growth factor beta-2                                      | P61812            | 0.04                | 0.177          | 47.748                        |
| Interleukin-5 receptor subunit alpha                                   | Q01344            | -0.04               | 0.180          | 47.685                        |
| Interleukin-25                                                         | Q9H293            | -0.04               | 0.182          | 20.330                        |
| Parathyroid hormone                                                    | P01270            | -0.04               | 0.182          | 12.861                        |
| Calcineurin                                                            | Q08209<br>P63098  | -0.04               | 0.183          | 58.688                        |
| Cytoplasmic protein NCK1                                               | P16333            | 0.04                | 0.187          | 42.864                        |
| Serum amyloid P-component                                              | P02743            | 0.04                | 0.187          | 25.387                        |
| Histone H1.2                                                           | P16403            | 0.04                | 0.187          | 21.365                        |



| <b>Protein</b>                                     | <b>UniProt ID</b> | <b>Spearman rho</b> | <b>p-value</b> | <b>Molecular Weight (kDa)</b> |
|----------------------------------------------------|-------------------|---------------------|----------------|-------------------------------|
| Leucine-rich repeat transmembrane protein FLRT1    | Q9NZU1            | 0.04                | 0.188          | 71.358                        |
| Interleukin-2                                      | P60568            | 0.04                | 0.188          | 17.628                        |
| Interleukin-6 receptor subunit alpha               | P08887            | -0.04               | 0.193          | 51.548                        |
| Carbohydrate sulfotransferase 2                    | Q9Y4C5            | 0.04                | 0.195          | 57.857                        |
| Interleukin-17 receptor D                          | Q8NFM7            | 0.04                | 0.196          | 82.411                        |
| Connective tissue growth factor                    | P29279            | 0.04                | 0.199          | 38.091                        |
| Carbonic anhydrase 13                              | Q8N1Q1            | 0.04                | 0.200          | 29.443                        |
| Sialic acid-binding Ig-like lectin 6               | O43699            | -0.04               | 0.204          | 49.913                        |
| Granzyme A                                         | P12544            | -0.04               | 0.205          | 28.999                        |
| Interleukin-1 receptor-like 2                      | Q9HB29            | -0.04               | 0.205          | 65.405                        |
| Spectrin alpha chain, non-erythrocytic 1           | Q13813            | 0.04                | 0.206          | 284.539                       |
| Matrix metalloproteinase-16                        | P51512            | 0.04                | 0.208          | 69.521                        |
| Histone acetyltransferase type B catalytic subunit | O14929            | 0.04                | 0.209          | 49.513                        |
| Interleukin-17 receptor A                          | Q96F46            | 0.04                | 0.209          | 96.122                        |
| Sialoadhesin                                       | Q9BZZ2            | -0.04               | 0.212          | 182.624                       |
| Urokinase-type plasminogen activator               | P00749            | 0.04                | 0.212          | 48.507                        |
| Homeobox protein NANOG                             | Q9H9S0            | 0.04                | 0.216          | 34.620                        |
| Fibroblast growth factor receptor 2                | P21802            | 0.04                | 0.217          | 92.025                        |
| Aurora kinase A                                    | O14965            | 0.04                | 0.219          | 45.809                        |
| Tumor necrosis factor ligand superfamily member 4  | P23510            | 0.04                | 0.221          | 21.050                        |
| Vitamin K-dependent protein S                      | P07225            | 0.04                | 0.228          | 75.123                        |
| Interleukin-4 receptor subunit alpha               | P24394            | 0.04                | 0.229          | 89.658                        |

| <b>Protein</b>                                        | <b>UniProt ID</b> | <b>Spearman rho</b> | <b>p-value</b> | <b>Molecular Weight (kDa)</b> |
|-------------------------------------------------------|-------------------|---------------------|----------------|-------------------------------|
| SLAM family member 7                                  | Q9NQ25            | 0.04                | 0.230          | 37.421                        |
| Serine/threonine-protein kinase PAK 6                 | Q9NQU5            | 0.04                | 0.234          | 74.869                        |
| Interleukin-22 receptor subunit alpha-1               | Q8N6P7            | 0.04                | 0.236          | 63.077                        |
| Homeodomain-interacting protein kinase 3              | Q9H422            | 0.04                | 0.238          | 133.743                       |
| Tyrosine-protein kinase Fyn                           | P06241            | 0.04                | 0.246          | 60.762                        |
| Brain-derived neurotrophic factor                     | P23560            | 0.04                | 0.247          | 27.818                        |
| Galactoside 3(4)-L-fucosyltransferase                 | P21217            | 0.04                | 0.250          | 42.117                        |
| MAP kinase-activated protein kinase 3                 | Q16644            | 0.04                | 0.254          | 42.987                        |
| Xaa-Pro aminopeptidase 1                              | Q9NQW7            | 0.04                | 0.255          | 69.918                        |
| Dentin matrix acidic phosphoprotein 1                 | Q13316            | -0.04               | 0.256          | 55.782                        |
| Interleukin-11                                        | P20809            | 0.04                | 0.257          | 21.429                        |
| G2/mitotic-specific cyclin-B1                         | P14635            | 0.04                | 0.267          | 48.337                        |
| 40S ribosomal protein SA                              | P08865            | -0.04               | 0.272          | 32.854                        |
| Epithelial discoidin domain-containing receptor 1     | Q08345            | -0.04               | 0.273          | 101.128                       |
| Reticulon-4                                           | Q9NQC3            | 0.04                | 0.273          | 129.931                       |
| Tumor necrosis factor receptor superfamily member 11A | Q9Y6Q6            | 0.04                | 0.273          | 66.034                        |
| Heparin-binding EGF-like growth factor                | Q99075            | -0.04               | 0.275          | 23.067                        |
| Integrin alpha-V: beta-5 complex                      | P06756, P18084    | 0.04                | 0.276          | 116.038                       |
| Moesin                                                | P26038            | 0.03                | 0.285          | 67.820                        |
| Contactin-2                                           | Q02246            | -0.03               | 0.286          | 113.393                       |
| Follicle stimulating hormone                          | P01215, P01225    | -0.03               | 0.297          | 13.075                        |

| <b>Protein</b>                                        | <b>UniProt ID</b> | <b>Spearman rho</b> | <b>p-value</b> | <b>Molecular Weight (kDa)</b> |
|-------------------------------------------------------|-------------------|---------------------|----------------|-------------------------------|
| Carbonic anhydrase 2                                  | P00918            | 0.03                | 0.299          | 29.246                        |
| Interleukin-8                                         | P10145            | 0.03                | 0.300          | 11.098                        |
| Intercellular adhesion molecule 5                     | Q9UMF0            | -0.03               | 0.305          | 97.116                        |
| Complement C4                                         | P0C0L4,<br>P0C0L5 | 0.03                | 0.305          | 192.785                       |
| Thymic stromal lymphopoietin                          | Q969D9            | -0.03               | 0.306          | 18.141                        |
| Protein-glutamine gamma-glutamyltransferase E         | Q08188            | -0.03               | 0.311          | 76.632                        |
| cAMP-dependent protein kinase catalytic subunit alpha | P17612            | 0.03                | 0.311          | 40.590                        |
| C-reactive protein                                    | P02741            | -0.03               | 0.313          | 25.039                        |
| C-C motif chemokine 19                                | Q99731            | -0.03               | 0.313          | 10.993                        |
| Tumor necrosis factor                                 | P01375            | 0.03                | 0.322          | 25.644                        |
| Angiotensinogen                                       | P01019            | 0.03                | 0.325          | 53.154                        |
| Complement C1r subcomponent                           | P00736            | 0.03                | 0.326          | 80.119                        |
| Natural cytotoxicity triggering receptor 2            | O95944            | -0.03               | 0.337          | 30.677                        |
| Endoglin                                              | P17813            | -0.03               | 0.341          | 70.578                        |
| Immunoglobulin M                                      | P01871            | -0.03               | 0.343          | 49.440                        |
| Tumor necrosis factor-inducible gene 6 protein        | P98066            | 0.03                | 0.345          | 31.203                        |
| Wnt inhibitory factor 1                               | Q9Y5W5            | -0.03               | 0.346          | 41.528                        |
| Interleukin-10 receptor subunit beta                  | Q08334            | -0.03               | 0.348          | 36.995                        |
| Tyrosine-protein phosphatase non-receptor type 6      | P29350            | -0.03               | 0.350          | 67.561                        |
| Lymphotoxin alpha1:beta2                              | P01374,<br>Q06643 | 0.03                | 0.353          | 22.297                        |
| Tumor necrosis factor receptor superfamily member 6B  | O95407            | -0.03               | 0.355          | 32.680                        |
| Fc receptor-like protein 3                            | Q96P31            | 0.03                | 0.356          | 80.856                        |

| <b>Protein</b>                                                | <b>UniProt ID</b> | <b>Spearman rho</b> | <b>p-value</b> | <b>Molecular Weight (kDa)</b> |
|---------------------------------------------------------------|-------------------|---------------------|----------------|-------------------------------|
| Kallikrein-7                                                  | P49862            | 0.03                | 0.358          | 27.525                        |
| Ribosomal protein S6 kinase alpha-5                           | O75582            | -0.03               | 0.358          | 89.865                        |
| Histone-lysine N-methyltransferase EHMT2                      | Q96KQ7            | 0.03                | 0.374          | 132.370                       |
| Azurocidin                                                    | P20160            | 0.03                | 0.375          | 26.886                        |
| Collagen alpha-1(VIII) chain                                  | P27658            | 0.03                | 0.381          | 73.364                        |
| Leukocyte immunoglobulin-like receptor subfamily B member 1   | Q8NHL6            | 0.03                | 0.385          | 70.819                        |
| Alpha-1-antichymotrypsin                                      | P01011            | -0.03               | 0.386          | 47.651                        |
| Killer cell immunoglobulin-like receptor 2DL4                 | Q99706            | 0.03                | 0.390          | 41.487                        |
| Tyrosine-protein kinase Fer                                   | P16591            | 0.03                | 0.392          | 94.638                        |
| Protein-tyrosine kinase 6                                     | Q13882            | 0.03                | 0.401          | 51.834                        |
| Transforming growth factor beta-1                             | P01137            | 0.03                | 0.406          | 44.341                        |
| Tyrosine-protein kinase HCK                                   | P08631            | 0.03                | 0.407          | 59.600                        |
| Growth-regulated alpha protein                                | P09341            | 0.03                | 0.410          | 11.301                        |
| Mitogen-activated protein kinase 3                            | P27361            | 0.03                | 0.411          | 43.136                        |
| Matrix metalloproteinase-14                                   | P50281            | -0.03               | 0.413          | 65.894                        |
| Interleukin-18 receptor 1                                     | Q13478            | 0.03                | 0.416          | 62.304                        |
| Interferon gamma receptor 1                                   | P15260            | -0.03               | 0.417          | 54.405                        |
| EGF-like module-containing mucin-like hormone receptor-like 2 | Q9UHX3            | -0.03               | 0.426          | 90.472                        |
| BMP-binding endothelial regulator protein                     | Q8N8U9            | -0.03               | 0.427          | 75.997                        |
| NKG2D ligand 3                                                | Q9BZM4            | 0.03                | 0.432          | 27.949                        |
| Gremlin-1                                                     | O60565            | 0.03                | 0.435          | 20.697                        |
| Protein E7_HP16                                               | P03129            | -0.03               | 0.436          | 11.022                        |

| <b>Protein</b>                                              | <b>UniProt ID</b> | <b>Spearman rho</b> | <b>p-value</b> | <b>Molecular Weight (kDa)</b> |
|-------------------------------------------------------------|-------------------|---------------------|----------------|-------------------------------|
| Myeloperoxidase                                             | P05164            | -0.03               | 0.437          | 83.869                        |
| Inter-alpha-trypsin inhibitor heavy chain H4                | Q14624            | -0.03               | 0.439          | 103.357                       |
| T-lymphocyte activation antigen CD80                        | P33681            | 0.03                | 0.442          | 33.048                        |
| Collagenase 3                                               | P45452            | -0.02               | 0.447          | 53.820                        |
| Heme oxygenase 2                                            | P30519            | -0.02               | 0.448          | 36.033                        |
| Allograft inflammatory factor 1                             | P55008            | 0.02                | 0.451          | 16.703                        |
| Interferon lambda-2                                         | Q8IZJ0            | 0.02                | 0.457          | 22.288                        |
| Membrane frizzled-related protein                           | Q9BY79            | 0.02                | 0.458          | 62.212                        |
| Carbonic anhydrase 9                                        | Q16790            | 0.02                | 0.461          | 49.698                        |
| Mediator of RNA polymerase II transcription subunit 1       | Q15648            | -0.02               | 0.462          | 168.478                       |
| Group IIE secretory phospholipase A2                        | Q9NZK7            | 0.02                | 0.464          | 15.989                        |
| Glypican-5                                                  | P78333            | 0.02                | 0.466          | 63.707                        |
| Myeloblastin                                                | P24158            | 0.02                | 0.468          | 27.807                        |
| Small nuclear ribonucleoprotein F                           | P62306            | 0.02                | 0.474          | 9.725                         |
| Trypsin-3                                                   | P35030            | 0.02                | 0.479          | 32.529                        |
| Biglycan                                                    | P21810            | -0.02               | 0.484          | 41.654                        |
| Leukocyte immunoglobulin-like receptor subfamily B member 2 | Q8N423            | 0.02                | 0.488          | 65.039                        |
| Glia-derived nexin                                          | P07093            | 0.02                | 0.488          | 44.002                        |
| Epidermal growth factor receptor substrate 15-like 1        | Q9UBC2            | -0.02               | 0.492          | 94.255                        |
| Sialic acid-binding Ig-like lectin 9                        | Q9Y336            | 0.02                | 0.494          | 50.082                        |
| Connective tissue-activating peptide III                    | P02775            | 0.02                | 0.499          | 13.894                        |
| Caspase-10                                                  | Q92851            | -0.02               | 0.503          | 58.951                        |

| <b>Protein</b>                                                | <b>UniProt ID</b> | <b>Spearman rho</b> | <b>p-value</b> | <b>Molecular Weight (kDa)</b> |
|---------------------------------------------------------------|-------------------|---------------------|----------------|-------------------------------|
| Teratocarcinoma-derived growth factor 1                       | P13385            | -0.02               | 0.505          | 21.169                        |
| Insulin-like growth factor 1 receptor                         | P08069            | -0.02               | 0.517          | 154.793                       |
| Tumor-associated calcium signal transducer 2                  | P09758            | 0.02                | 0.518          | 35.709                        |
| Granulysin                                                    | P22749            | 0.02                | 0.531          | 16.374                        |
| Aggrecan core protein                                         | P16112            | -0.02               | 0.539          | 261.329                       |
| Tumor necrosis factor ligand superfamily member 8             | P32971            | -0.02               | 0.539          | 26.017                        |
| CD166 antigen                                                 | Q13740            | 0.02                | 0.547          | 65.102                        |
| Neurogenic locus notch homolog protein 2                      | Q04721            | -0.02               | 0.547          | 265.405                       |
| Complement factor H-related protein 5                         | Q9BXR6            | -0.02               | 0.549          | 64.419                        |
| Ephrin type-A receptor 3                                      | P29320            | -0.02               | 0.555          | 110.131                       |
| Nidogen-1                                                     | P14543            | -0.02               | 0.555          | 136.377                       |
| Alkaline phosphatase, tissue-nonspecific isozyme              | P05186            | 0.02                | 0.559          | 57.305                        |
| Tumor necrosis factor ligand superfamily member 13B           | Q9Y275            | 0.02                | 0.559          | 31.223                        |
| Immunoglobulin E                                              | P01854            | 0.02                | 0.563          | 47.019                        |
| High affinity cAMP-specific 3',5'-cyclic phosphodiesterase 7A | Q13946            | 0.02                | 0.565          | 55.505                        |
| Desmocollin-3                                                 | Q14574            | -0.02               | 0.566          | 99.969                        |
| Dickkopf-related protein 1                                    | O94907            | -0.02               | 0.570          | 28.672                        |
| FACT complex subunit SSRP1                                    | Q08945            | 0.02                | 0.573          | 81.075                        |
| Platelet-derived growth factor C                              | Q9NRA1            | 0.02                | 0.573          | 39.029                        |
| Nidogen-2                                                     | Q14112            | -0.02               | 0.575          | 151.254                       |
| Megakaryocyte-associated tyrosine-protein kinase              | P42679            | 0.02                | 0.575          | 56.469                        |

| <b>Protein</b>                                                                                                                                | <b>UniProt ID</b> | <b>Spearman rho</b> | <b>p-value</b> | <b>Molecular Weight (kDa)</b> |
|-----------------------------------------------------------------------------------------------------------------------------------------------|-------------------|---------------------|----------------|-------------------------------|
| Hyaluronan and proteoglycan link protein 1                                                                                                    | P10915            | 0.02                | 0.575          | 40.166                        |
| Phosphatidylinositol 4,5-bisphosphate 3-kinase catalytic subunit alpha isoform:Phosphatidylinositol 3-kinase regulatory subunit alpha complex | P42336<br>P27986  | 0.02                | 0.576          | 124.284                       |
| MHC class I polypeptide-related sequence A                                                                                                    | Q29983            | -0.02               | 0.578          | 42.915                        |
| Heterogeneous nuclear ribonucleoprotein A/B                                                                                                   | Q99729            | 0.02                | 0.582          | 36.225                        |
| Dipeptidyl peptidase 1                                                                                                                        | P53634            | 0.02                | 0.587          | 51.854                        |
| Nicotinamide phosphoribosyltransferase                                                                                                        | P43490            | -0.02               | 0.590          | 55.521                        |
| Anti-Muellerian hormone type-2 receptor                                                                                                       | Q16671            | -0.02               | 0.597          | 62.750                        |
| Pituitary adenylate cyclase-activating polypeptide 27                                                                                         | P18509            | 0.02                | 0.598          | 18.835                        |
| Peptidyl-prolyl cis-trans isomerase E                                                                                                         | Q9UNP9            | -0.02               | 0.598          | 33.341                        |
| Erythropoietin receptor                                                                                                                       | P19235            | 0.02                | 0.598          | 55.065                        |
| Granulins                                                                                                                                     | P28799            | 0.02                | 0.603          | 63.544                        |
| Hepatocyte growth factor                                                                                                                      | P14210            | 0.02                | 0.621          | 83.134                        |
| Lamin-B1                                                                                                                                      | P20700            | 0.02                | 0.622          | 66.408                        |
| Lactotransferrin                                                                                                                              | P02788            | 0.02                | 0.625          | 78.182                        |
| Platelet-derived growth factor receptor beta                                                                                                  | P09619            | -0.02               | 0.633          | 123.968                       |
| Angiopietin-4                                                                                                                                 | Q9Y264            | -0.02               | 0.643          | 56.849                        |
| Junctional adhesion molecule-like                                                                                                             | Q86YT9            | 0.02                | 0.645          | 44.339                        |
| Fibronectin Fragment 3                                                                                                                        | P02751            | -0.01               | 0.650          | 262.625                       |
| Tyrosine-protein kinase ABL1                                                                                                                  | P00519            | 0.01                | 0.654          | 122.873                       |
| Fibroblast growth factor receptor 3                                                                                                           | P22607            | 0.01                | 0.655          | 87.710                        |

| <b>Protein</b>                                                  | <b>UniProt ID</b> | <b>Spearman rho</b> | <b>p-value</b> | <b>Molecular Weight (kDa)</b> |
|-----------------------------------------------------------------|-------------------|---------------------|----------------|-------------------------------|
| Interleukin-1 receptor-like 1                                   | Q01638            | 0.01                | 0.669          | 63.358                        |
| Phosphoglycerate kinase 1                                       | P00558            | -0.01               | 0.671          | 44.615                        |
| Leucine-rich repeat transmembrane neuronal protein 3            | Q86VH5            | -0.01               | 0.674          | 65.896                        |
| Neutrophil elastase                                             | P08246            | 0.01                | 0.675          | 28.518                        |
| Hepatocyte growth factor activator                              | Q04756            | 0.01                | 0.676          | 70.682                        |
| Activin receptor type-1B                                        | P36896            | 0.01                | 0.679          | 56.807                        |
| Membrane metallo-endopeptidase-like 1                           | Q495T6            | 0.01                | 0.681          | 89.367                        |
| Tumor necrosis factor ligand superfamily member 6, soluble form | P48023            | 0.01                | 0.693          | 31.485                        |
| Protein kinase C zeta type                                      | Q05513            | -0.01               | 0.694          | 67.660                        |
| C-type lectin domain family 4 member K                          | Q9UJ71            | -0.01               | 0.701          | 36.725                        |
| Casein kinase II 2-alpha':2-beta heterotetramer                 | P19784<br>P67870  | 0.01                | 0.702          | 41.213                        |
| Histidine triad nucleotide-binding protein 1                    | P49773            | 0.01                | 0.715          | 13.802                        |
| Serine/threonine-protein kinase PLK1                            | P53350            | -0.01               | 0.715          | 68.255                        |
| Kallikrein-13                                                   | Q9UKR3            | -0.01               | 0.720          | 30.570                        |
| Brevican core protein                                           | Q96GW7            | -0.01               | 0.721          | 99.118                        |
| SUMO-conjugating enzyme UBC9                                    | P63279            | 0.01                | 0.729          | 18.007                        |
| Tumor necrosis factor ligand superfamily member 14              | O43557            | -0.01               | 0.739          | 26.350                        |
| Cathepsin S                                                     | P25774            | 0.01                | 0.744          | 37.496                        |
| Eukaryotic translation initiation factor 5A-1                   | P63241            | 0.01                | 0.752          | 16.832                        |
| Thrombopoietin Receptor                                         | P40238            | -0.01               | 0.752          | 71.245                        |



| <b>Protein</b>                                           | <b>UniProt ID</b> | <b>Spearman rho</b> | <b>p-value</b> | <b>Molecular Weight (kDa)</b> |
|----------------------------------------------------------|-------------------|---------------------|----------------|-------------------------------|
| Bactericidal permeability-increasing protein             | P17213            | 0.01                | 0.752          | 53.900                        |
| N-acetyl-D-glucosamine kinase                            | Q9UJ70            | 0.01                | 0.752          | 37.376                        |
| 26S proteasome non-ATPase regulatory subunit 7           | P51665            | -0.01               | 0.757          | 37.025                        |
| CD209 antigen                                            | Q9NNX6            | 0.01                | 0.762          | 45.775                        |
| Granulocyte colony-stimulating factor receptor           | Q99062            | -0.01               | 0.770          | 92.156                        |
| Histone deacetylase 8                                    | Q9BY41            | -0.01               | 0.773          | 41.758                        |
| Tissue factor pathway inhibitor                          | P10646            | 0.01                | 0.774          | 35.015                        |
| Neural cell adhesion molecule 1, 120 kDa isoform         | P13591            | -0.01               | 0.777          | 94.574                        |
| Inosine-5'-monophosphate dehydrogenase 1                 | P20839            | -0.01               | 0.785          | 55.406                        |
| Lymphotactin                                             | P47992            | -0.01               | 0.785          | 12.517                        |
| Immunoglobulin G                                         | P01857            | -0.01               | 0.789          | 36.106                        |
| Peroxiredoxin-5, mitochondrial                           | P30044            | 0.01                | 0.790          | 22.086                        |
| Cathepsin G                                              | P08311            | -0.01               | 0.799          | 28.837                        |
| Heterogeneous nuclear ribonucleoprotein K                | P61978            | 0.01                | 0.805          | 50.976                        |
| Desmoglein-2                                             | Q14126            | 0.01                | 0.807          | 122.294                       |
| Chloride intracellular channel protein 1                 | O00299            | 0.01                | 0.819          | 26.923                        |
| Stem Cell Growth Factor-alpha                            | Q9Y240            | -0.01               | 0.823          | 35.695                        |
| Endothelin-converting enzyme 1                           | P42892            | 0.01                | 0.824          | 87.164                        |
| Lymphotoxin-alpha                                        | P01374            | 0.01                | 0.826          | 22.297                        |
| Desmoglein-1                                             | Q02413            | -0.01               | 0.832          | 113.748                       |
| X-linked interleukin-1 receptor accessory protein-like 2 | Q9NP60            | -0.01               | 0.833          | 78.670                        |
| Kallikrein-6                                             | Q92876            | 0.01                | 0.837          | 26.856                        |

| <b>Protein</b>                                                | <b>UniProt ID</b>          | <b>Spearman rho</b> | <b>p-value</b> | <b>Molecular Weight (kDa)</b> |
|---------------------------------------------------------------|----------------------------|---------------------|----------------|-------------------------------|
| Mitogen-activated protein kinase 8                            | P45983                     | -0.01               | 0.837          | 48.296                        |
| Fibrinogen                                                    | P02671<br>P02675<br>P02679 | -0.01               | 0.838          | 94.973                        |
| Microtubule-associated protein tau                            | P10636                     | -0.01               | 0.848          | 78.928                        |
| Glial fibrillary acidic protein                               | P14136                     | -0.01               | 0.848          | 49.880                        |
| Interleukin-2 receptor subunit alpha                          | P01589                     | -0.01               | 0.852          | 30.819                        |
| Carbohydrate sulfotransferase 15                              | Q7LFX5                     | 0.01                | 0.852          | 64.926                        |
| Sphingosine kinase 2                                          | Q9NRA0                     | -0.01               | 0.869          | 69.217                        |
| Tumor necrosis factor receptor superfamily member 13B         | O14836                     | -0.01               | 0.871          | 31.816                        |
| C-C motif chemokine 1                                         | P22362                     | 0.01                | 0.872          | 10.992                        |
| Insulin                                                       | P01308                     | -0.01               | 0.873          | 11.981                        |
| Coagulation Factor VII                                        | P08709                     | 0                   | 0.892          | 51.594                        |
| Low molecular weight phosphotyrosine protein phosphatase      | P24666                     | 0                   | 0.898          | 18.042                        |
| N-acyl ethanolamine-hydrolyzing acid amidase                  | Q02083                     | 0                   | 0.898          | 40.066                        |
| Fibroblast growth factor 5                                    | P12034                     | 0                   | 0.899          | 29.551                        |
| X-ray repair cross-complementing protein 6                    | P12956                     | 0                   | 0.902          | 69.843                        |
| Serine/threonine-protein kinase pim-1                         | P11309                     | 0                   | 0.902          | 45.412                        |
| Cofilin-1                                                     | P23528                     | 0                   | 0.905          | 18.502                        |
| High affinity immunoglobulin gamma Fc receptor I              | P12314                     | 0                   | 0.909          | 42.632                        |
| Eukaryotic translation initiation factor 4E-binding protein 2 | Q13542                     | 0                   | 0.911          | 12.939                        |
| Glucose-6-phosphate isomerase                                 | P06744                     | 0                   | 0.913          | 63.147                        |

| <b>Protein</b>                                        | <b>UniProt ID</b> | <b>Spearman rho</b> | <b>p-value</b> | <b>Molecular Weight (kDa)</b> |
|-------------------------------------------------------|-------------------|---------------------|----------------|-------------------------------|
| Integrin alpha-I: beta-1 complex                      | P56199, P05556    | 0                   | 0.914          | 130.848                       |
| Tumor necrosis factor receptor superfamily member 25  | Q93038            | 0                   | 0.915          | 45.385                        |
| Placenta growth factor                                | P49763            | 0                   | 0.921          | 24.789                        |
| Contactin-1                                           | Q12860            | 0                   | 0.938          | 113.320                       |
| Inhibin beta A chain:Inhibin beta B chain heterodimer | P08476 P09529     | 0                   | 0.939          | 47.442                        |
| Sonic hedgehog protein                                | Q15465            | 0                   | 0.940          | 49.607                        |
| MAP kinase-activated protein kinase 5                 | Q8IW41            | 0                   | 0.940          | 54.220                        |
| Stromelysin-2                                         | P09238            | 0                   | 0.943          | 54.151                        |
| Semaphorin-6A                                         | Q9H2E6            | 0                   | 0.944          | 114.395                       |
| Sorting nexin-4                                       | O95219            | 0                   | 0.945          | 51.909                        |
| Apolipoprotein B                                      | P04114            | 0                   | 0.946          | 515.605                       |
| Mannose-binding protein C                             | P11226            | 0                   | 0.958          | 26.144                        |
| Tumor necrosis factor receptor superfamily member 12A | Q9NP84            | 0                   | 0.960          | 13.911                        |
| High affinity nerve growth factor receptor            | P04629            | 0                   | 0.963          | 87.497                        |
| Protein lin-7 homolog B                               | Q9HAP6            | 0                   | 0.964          | 22.896                        |
| Heat shock cognate 71 kDa protein                     | P11142            | 0                   | 0.969          | 70.898                        |
| Stem Cell Growth Factor-beta                          | Q9Y240            | 0                   | 0.981          | 35.695                        |
| Fibroblast growth factor 17                           | O60258            | 0                   | 0.985          | 24.891                        |
| Cadherin-12                                           | P55289            | 0                   | 0.998          | 88.332                        |

| Protein                                               | UniProt ID | HR   | p-value                | Bonferroni corrected p-value | HR corrected for eGFR | p-value (HR corrected for eGFR) | p-value (HR corrected for eGFR and Bonferroni corrected) |
|-------------------------------------------------------|------------|------|------------------------|------------------------------|-----------------------|---------------------------------|----------------------------------------------------------|
| Metalloproteinase inhibitor 1                         | P01033     | 1.34 | <2.2x10 <sup>-16</sup> | <2.2x10 <sup>-16</sup>       | 1.28                  | 2.11x10 <sup>-13</sup>          | 2.22x10 <sup>-10</sup>                                   |
| Insulin-like growth factor-binding protein 2          | P18065     | 1.57 | <2.2x10 <sup>-16</sup> | <2.2x10 <sup>-16</sup>       | 1.41                  | 6.92x10 <sup>-11</sup>          | 7.30x10 <sup>-08</sup>                                   |
| Angiopoietin-2                                        | O15123     | 1.66 | <2.2x10 <sup>-16</sup> | <2.2x10 <sup>-16</sup>       | 1.52                  | 0                               | 0                                                        |
| Cystatin-C                                            | P01034     | 1.48 | <2.2x10 <sup>-16</sup> | <2.2x10 <sup>-16</sup>       | 1.49                  | 2.22x10 <sup>-06</sup>          | 0.00234                                                  |
| Ephrin-A4                                             | P52798     | 1.43 | <2.2x10 <sup>-16</sup> | <2.2x10 <sup>-16</sup>       | 1.25                  | 0.000372                        | 0.392                                                    |
| Cadherin-3                                            | P22223     | 0.67 | <2.2x10 <sup>-16</sup> | <2.2x10 <sup>-16</sup>       | 0.74                  | 3.76x10 <sup>-09</sup>          | 3.96x10 <sup>-06</sup>                                   |
| Tumor necrosis factor receptor superfamily member 1A  | P19438     | 1.23 | <2.2x10 <sup>-16</sup> | <2.2x10 <sup>-16</sup>       | 1.13                  | 0.00177                         | 1                                                        |
| Epidermal growth factor receptor                      | P00533     | 0.59 | <2.2x10 <sup>-16</sup> | <2.2x10 <sup>-16</sup>       | 0.65                  | 5.66x10 <sup>-15</sup>          | 5.97x10 <sup>-12</sup>                                   |
| Matrilysin                                            | P09237     | 1.52 | <2.2x10 <sup>-16</sup> | <2.2x10 <sup>-16</sup>       | 1.37                  | 1.16x10 <sup>-11</sup>          | 1.23x10 <sup>-08</sup>                                   |
| Complement component C7                               | P10643     | 1.46 | <2.2x10 <sup>-16</sup> | <2.2x10 <sup>-16</sup>       | 1.46                  | 0                               | 0                                                        |
| C-C motif chemokine 14                                | Q16627     | 1.54 | <2.2x10 <sup>-16</sup> | <2.2x10 <sup>-16</sup>       | 1.33                  | 2.80x10 <sup>-06</sup>          | 0.00295                                                  |
| Neuroblastoma suppressor of tumorigenicity 1          | P41271     | 1.43 | <2.2x10 <sup>-16</sup> | <2.2x10 <sup>-16</sup>       | 1.28                  | 0.000461                        | 0.4857                                                   |
| Growth hormone receptor                               | P10912     | 0.62 | <2.2x10 <sup>-16</sup> | <2.2x10 <sup>-16</sup>       | 0.68                  | 7.88x10 <sup>-15</sup>          | 8.31x10 <sup>-12</sup>                                   |
| Alpha-2-antiplasmin                                   | P08697     | 0.64 | <2.2x10 <sup>-16</sup> | <2.2x10 <sup>-16</sup>       | 0.7                   | 1.87x10 <sup>-12</sup>          | 1.97x10 <sup>-09</sup>                                   |
| Tumor necrosis factor receptor superfamily member 27  | Q9HAV5     | 1.26 | <2.2x10 <sup>-16</sup> | <2.2x10 <sup>-16</sup>       | 1.17                  | 1.51x10 <sup>-05</sup>          | 0.0159                                                   |
| Tumor necrosis factor receptor superfamily member 1B  | P20333     | 1.56 | <2.2x10 <sup>-16</sup> | <2.2x10 <sup>-16</sup>       | 1.41                  | 9.41x10 <sup>-09</sup>          | 9.92x10 <sup>-06</sup>                                   |
| Thrombospondin-2                                      | P35442     | 1.53 | <2.2x10 <sup>-16</sup> | <2.2x10 <sup>-16</sup>       | 1.47                  | 0                               | 0                                                        |
| Follistatin-related protein 3                         | O95633     | 1.55 | <2.2x10 <sup>-16</sup> | <2.2x10 <sup>-16</sup>       | 1.4                   | 6.14x10 <sup>-08</sup>          | 6.48x10 <sup>-05</sup>                                   |
| Beta-2-microglobulin                                  | P61769     | 1.53 | <2.2x10 <sup>-16</sup> | <2.2x10 <sup>-16</sup>       | 1.5                   | 1.77x10 <sup>-09</sup>          | 1.87x10 <sup>-06</sup>                                   |
| Beta-Ala-His dipeptidase                              | Q96KN2     | 0.69 | <2.2x10 <sup>-16</sup> | <2.2x10 <sup>-16</sup>       | 0.72                  | 2.78x10 <sup>-15</sup>          | 2.93x10 <sup>-12</sup>                                   |
| Cathepsin H                                           | P09668     | 1.52 | <2.2x10 <sup>-16</sup> | <2.2x10 <sup>-16</sup>       | 1.45                  | 2.95x10 <sup>-08</sup>          | 3.11x10 <sup>-05</sup>                                   |
| Spondin-1                                             | Q9HCB6     | 1.4  | <2.2x10 <sup>-16</sup> | <2.2x10 <sup>-16</sup>       | 1.33                  | 3.35x10 <sup>-12</sup>          | 3.53x10 <sup>-09</sup>                                   |
| Macrophage metalloelastase                            | P39900     | 1.65 | <2.2x10 <sup>-16</sup> | <2.2x10 <sup>-16</sup>       | 1.5                   | 8.88x10 <sup>-16</sup>          | 9.36x10 <sup>-13</sup>                                   |
| Ephrin type-A receptor 2                              | P29317     | 1.42 | <2.2x10 <sup>-16</sup> | <2.2x10 <sup>-16</sup>       | 1.26                  | 3.77x10 <sup>-06</sup>          | 0.00397                                                  |
| Adapter molecule crk                                  | P46108     | 1.37 | <2.2x10 <sup>-16</sup> | <2.2x10 <sup>-16</sup>       | 1.17                  | 0.007316                        | 1                                                        |
| Tumor necrosis factor receptor superfamily member 19L | Q969Z4     | 1.45 | <2.2x10 <sup>-16</sup> | <2.2x10 <sup>-16</sup>       | 1.26                  | 0.000289                        | 0.305                                                    |
| Scavenger receptor class F member 1                   | Q14162     | 1.38 | <2.2x10 <sup>-16</sup> | <2.2x10 <sup>-16</sup>       | 1.2                   | 0.000298                        | 0.314                                                    |
| Hepatitis A virus cellular receptor 2                 | Q8TDQ0     | 1.59 | <2.2x10 <sup>-16</sup> | <2.2x10 <sup>-16</sup>       | 1.42                  | 1.77x10 <sup>-10</sup>          | 1.86x10 <sup>-07</sup>                                   |
| Delta-like protein 1                                  | O00548     | 1.31 | <2.2x10 <sup>-16</sup> | <2.2x10 <sup>-16</sup>       | 1.21                  | 6.03x10 <sup>-07</sup>          | 0.000635                                                 |
| Interleukin-18-binding protein                        | O95998     | 1.49 | 1.11x10 <sup>-16</sup> | 1.17x10 <sup>-13</sup>       | 1.35                  | 9.84x10 <sup>-09</sup>          | 1.04x10 <sup>-05</sup>                                   |
| Macrophage-capping protein                            | P40121     | 1.35 | 2.22x10 <sup>-16</sup> | 2.34x10 <sup>-13</sup>       | 1.22                  | 7.91x10 <sup>-06</sup>          | 0.00834                                                  |
| Netrin receptor UNC5C                                 | O95185     | 1.43 | 2.22x10 <sup>-16</sup> | 2.34x10 <sup>-13</sup>       | 1.23                  | 0.000264                        | 0.278                                                    |
| Brain-specific serine protease 4                      | Q9GZN4     | 1.42 | 3.33x10 <sup>-16</sup> | 3.51x10 <sup>-13</sup>       | 1.3                   | 2.66x10 <sup>-08</sup>          | 2.80x10 <sup>-05</sup>                                   |
| C-C motif chemokine 18                                | P55774     | 1.46 | 4.44x10 <sup>-16</sup> | 4.68x10 <sup>-13</sup>       | 1.35                  | 1.27x10 <sup>-09</sup>          | 1.34x10 <sup>-06</sup>                                   |
| Chordin-like protein 1                                | Q9BU40     | 1.47 | 5.55x10 <sup>-16</sup> | 5.85x10 <sup>-13</sup>       | 1.31                  | 1.33x10 <sup>-07</sup>          | 0.000140                                                 |

| Protein                                                    | UniProt ID     | HR   | p-value                | Bonferroni corrected p-value | HR corrected for eGFR | p-value (HR corrected for eGFR) | p-value (HR corrected for eGFR and Bonferroni corrected) |
|------------------------------------------------------------|----------------|------|------------------------|------------------------------|-----------------------|---------------------------------|----------------------------------------------------------|
| Ephrin type-B receptor 2                                   | P29323         | 1.49 | 5.55x10 <sup>-16</sup> | 5.85x10 <sup>-13</sup>       | 1.33                  | 4.61x10 <sup>-08</sup>          | 4.85x10 <sup>-05</sup>                                   |
| Endostatin                                                 | P39060         | 1.5  | 6.66x10 <sup>-16</sup> | 7.02x10 <sup>-13</sup>       | 1.26                  | 0.000147                        | 0.155                                                    |
| SLAM family member 5                                       | Q9UIB8         | 1.29 | 1.24x10 <sup>-14</sup> | 1.31x10 <sup>-11</sup>       | 1.23                  | 1.59x10 <sup>-07</sup>          | 0.000167                                                 |
| Vitamin K-dependent protein C                              | P04070         | 0.74 | 1.44x10 <sup>-14</sup> | 1.52x10 <sup>-11</sup>       | 0.76                  | 1.06x10 <sup>-10</sup>          | 1.12x10 <sup>-07</sup>                                   |
| Cell adhesion molecule-related/down-regulated by oncogenes | Q4KMG0         | 0.7  | 1.91x10 <sup>-14</sup> | 2.01x10 <sup>-11</sup>       | 0.78                  | 9.85x10 <sup>-07</sup>          | 0.00104                                                  |
| Bone morphogenetic protein 1                               | P13497         | 0.7  | 2.63x10 <sup>-14</sup> | 2.77x10 <sup>-11</sup>       | 0.78                  | 8.03x10 <sup>-07</sup>          | 0.000847                                                 |
| Ephrin-A5                                                  | P52803         | 1.36 | 3.03x10 <sup>-14</sup> | 3.19x10 <sup>-11</sup>       | 1.1                   | 0.113                           | 1                                                        |
| Endothelial cell-selective adhesion molecule               | Q96AP7         | 1.36 | 6.36x10 <sup>-14</sup> | 6.71x10 <sup>-11</sup>       | 1.04                  | 0.521                           | 1                                                        |
| Protein jagged-1                                           | P78504         | 1.42 | 9.56x10 <sup>-14</sup> | 1.01x10 <sup>-10</sup>       | 1.36                  | 1.54x10 <sup>-10</sup>          | 1.62x10 <sup>-07</sup>                                   |
| PSA:alpha-1-antichymotrypsin complex                       | P07288, P01011 | 1.38 | 1.15x10 <sup>-13</sup> | 1.21x10 <sup>-10</sup>       | 1.3                   | 7.97x10 <sup>-09</sup>          | 8.40x10 <sup>-06</sup>                                   |
| Proto-oncogene tyrosine-protein kinase receptor Ret        | P07949         | 0.65 | 1.20x10 <sup>-13</sup> | 1.27x10 <sup>-10</sup>       | 0.74                  | 1.36x10 <sup>-07</sup>          | 0.000143                                                 |
| Platelet-activating factor acetylhydrolase IB subunit beta | P68402         | 1.29 | 2.41x10 <sup>-13</sup> | 2.54x10 <sup>-10</sup>       | 1.13                  | 0.0105                          | 1                                                        |
| Creatine kinase M-type:Creatine kinase B-type heterodimer  | P12277 P06732  | 0.68 | 2.80x10 <sup>-13</sup> | 2.95x10 <sup>-10</sup>       | 0.75                  | 1.38x10 <sup>-07</sup>          | 0.000146                                                 |
| Complement component C9                                    | P02748         | 1.47 | 3.94x10 <sup>-13</sup> | 4.16x10 <sup>-10</sup>       | 1.39                  | 7.28x10 <sup>-10</sup>          | 7.67x10 <sup>-07</sup>                                   |
| Dual 3',5'-cyclic-AMP and -GMP phosphodiesterase 11A       | Q9HCR9         | 0.67 | 4.20x10 <sup>-13</sup> | 4.43x10 <sup>-10</sup>       | 0.77                  | 3.75x10 <sup>-06</sup>          | 0.00396                                                  |
| Trefoil factor 3                                           | Q07654         | 1.3  | 7.64x10 <sup>-13</sup> | 8.05x10 <sup>-10</sup>       | 1.11                  | 0.0539                          | 1                                                        |
| Urokinase plasminogen activator surface receptor           | Q03405         | 1.28 | 1.87x10 <sup>-12</sup> | 1.97x10 <sup>-09</sup>       | 1.21                  | 1.23x10 <sup>-05</sup>          | 0.0129                                                   |
| Tissue Factor                                              | P13726         | 1.22 | 2.74x10 <sup>-12</sup> | 2.89x10 <sup>-09</sup>       | 1.15                  | 0.000159                        | 0.167                                                    |
| Tumor necrosis factor ligand superfamily member 15         | O95150         | 1.27 | 2.88x10 <sup>-12</sup> | 3.03x10 <sup>-09</sup>       | 1.13                  | 0.00479                         | 1                                                        |
| Troponin I, cardiac muscle                                 | P19429         | 1.26 | 3.06x10 <sup>-12</sup> | 3.23x10 <sup>-09</sup>       | 1.26                  | 6.00x10 <sup>-11</sup>          | 6.33x10 <sup>-08</sup>                                   |
| Glutathione S-transferase P                                | P09211         | 1.35 | 5.50x10 <sup>-12</sup> | 5.80x10 <sup>-09</sup>       | 1.15                  | 0.00686                         | 1                                                        |
| Neuroigin-4, X-linked                                      | Q8NOW4         | 1.28 | 7.06x10 <sup>-12</sup> | 7.44x10 <sup>-09</sup>       | 1.18                  | 5.16x10 <sup>-05</sup>          | 0.0544                                                   |
| Angiostatin                                                | P00747         | 0.72 | 9.43x10 <sup>-12</sup> | 9.94x10 <sup>-09</sup>       | 0.81                  | 3.51x10 <sup>-05</sup>          | 0.0370                                                   |
| Vascular endothelial growth factor A                       | P15692         | 1.38 | 1.55x10 <sup>-11</sup> | 1.64x10 <sup>-08</sup>       | 1.23                  | 5.05x10 <sup>-05</sup>          | 0.0532                                                   |
| Creatine kinase M-type                                     | P06732         | 0.69 | 1.83x10 <sup>-11</sup> | 1.93x10 <sup>-08</sup>       | 0.74                  | 9.15x10 <sup>-08</sup>          | 9.64x10 <sup>-05</sup>                                   |
| Elafin                                                     | P19957         | 1.34 | 1.86x10 <sup>-11</sup> | 1.96x10 <sup>-08</sup>       | 1.13                  | 0.0215                          | 1                                                        |
| Fibroblast growth factor 7                                 | P21781         | 1.24 | 2.58x10 <sup>-11</sup> | 2.72x10 <sup>-08</sup>       | 1.2                   | 5.70x10 <sup>-07</sup>          | 0.000601                                                 |
| Vascular endothelial growth factor receptor 2              | P35968         | 0.73 | 2.84x10 <sup>-11</sup> | 2.99x10 <sup>-08</sup>       | 0.81                  | 2.50x10 <sup>-05</sup>          | 0.0264                                                   |
| Receptor tyrosine-protein kinase erbB-3                    | P21860         | 0.71 | 3.57x10 <sup>-11</sup> | 3.77x10 <sup>-08</sup>       | 0.81                  | 0.000223                        | 0.2355                                                   |
| C-X-C motif chemokine 13                                   | O43927         | 1.28 | 3.70x10 <sup>-11</sup> | 3.90x10 <sup>-08</sup>       | 1.24                  | 4.05x10 <sup>-08</sup>          | 4.27x10 <sup>-05</sup>                                   |
| Plasma kallikrein                                          | P03952         | 0.75 | 4.33x10 <sup>-11</sup> | 4.57x10 <sup>-08</sup>       | 0.8                   | 7.56x10 <sup>-07</sup>          | 0.000796                                                 |
| Stanniocalcin-1                                            | P52823         | 1.33 | 5.88x10 <sup>-11</sup> | 6.20x10 <sup>-08</sup>       | 1.21                  | 4.73x10 <sup>-05</sup>          | 0.0498                                                   |
| Kallikrein-11                                              | Q9UBX7         | 1.3  | 6.26x10 <sup>-11</sup> | 6.60x10 <sup>-08</sup>       | 1.11                  | 0.0415                          | 1                                                        |

| Protein                                                           | UniProt ID | HR   | p-value                | Bonferroni corrected p-value | HR corrected for eGFR | p-value (HR corrected for eGFR) | p-value (HR corrected for eGFR and Bonferroni corrected) |
|-------------------------------------------------------------------|------------|------|------------------------|------------------------------|-----------------------|---------------------------------|----------------------------------------------------------|
| Periostin                                                         | Q15063     | 1.38 | 6.61x10 <sup>-11</sup> | 6.97x10 <sup>-08</sup>       | 1.28                  | 1.04x10 <sup>-06</sup>          | 0.00110                                                  |
| Insulin-like growth factor-binding protein 6                      | P24592     | 1.26 | 1.14x10 <sup>-10</sup> | 1.20x10 <sup>-07</sup>       | 0.92                  | 0.237                           | 1                                                        |
| Angiopoietin-related protein 4                                    | Q9BY76     | 1.26 | 1.80x10 <sup>-10</sup> | 1.89x10 <sup>-07</sup>       | 1.23                  | 8.20x10 <sup>-08</sup>          | 8.64x10 <sup>-05</sup>                                   |
| Pancreatic hormone                                                | P01298     | 1.32 | 1.94x10 <sup>-10</sup> | 2.04x10 <sup>-07</sup>       | 1.19                  | 0.000248                        | 0.261                                                    |
| Heat shock 70 kDa protein 1A/1B                                   | P08107     | 1.33 | 4.37x10 <sup>-10</sup> | 4.60x10 <sup>-07</sup>       | 1.28                  | 1.60x10 <sup>-07</sup>          | 0.000168                                                 |
| Fatty acid-binding protein, heart                                 | P05413     | 1.26 | 4.50x10 <sup>-10</sup> | 4.75x10 <sup>-07</sup>       | 1.09                  | 0.0923                          | 1                                                        |
| Antileukoproteinase                                               | P03973     | 1.32 | 5.57x10 <sup>-10</sup> | 5.87x10 <sup>-07</sup>       | 1.15                  | 0.00724                         | 1                                                        |
| Low affinity immunoglobulin gamma Fc region receptor III-B        | O75015     | 1.33 | 8.93x10 <sup>-10</sup> | 9.42x10 <sup>-07</sup>       | 1.3                   | 1.85x10 <sup>-08</sup>          | 1.95x10 <sup>-05</sup>                                   |
| Tumor necrosis factor receptor superfamily member 21              | O75509     | 1.34 | 1.07x10 <sup>-09</sup> | 1.13x10 <sup>-06</sup>       | 1.11                  | 0.0744                          | 1                                                        |
| Coiled-coil domain-containing protein 80                          | Q76M96     | 1.33 | 1.11x10 <sup>-09</sup> | 1.17x10 <sup>-06</sup>       | 1.17                  | 0.00254                         | 1                                                        |
| 15-hydroxyprostaglandin dehydrogenase [NAD(+)]                    | P15428     | 0.72 | 1.15x10 <sup>-09</sup> | 1.21x10 <sup>-06</sup>       | 0.79                  | 6.43x10 <sup>-06</sup>          | 0.00678                                                  |
| A disintegrin and metalloproteinase with thrombospondin motifs 13 | Q76LX8     | 0.77 | 1.22x10 <sup>-09</sup> | 1.29x10 <sup>-06</sup>       | 0.87                  | 0.00553                         | 1                                                        |
| Lymphocyte activation gene 3 protein                              | P18627     | 1.34 | 1.30x10 <sup>-09</sup> | 1.37x10 <sup>-06</sup>       | 1.28                  | 5.88x10 <sup>-07</sup>          | 0.000619                                                 |
| Kallistatin                                                       | P29622     | 0.76 | 1.73x10 <sup>-09</sup> | 1.83x10 <sup>-06</sup>       | 0.8                   | 1.90x10 <sup>-06</sup>          | 0.00200                                                  |
| Stromelysin-1                                                     | P08254     | 1.33 | 1.74x10 <sup>-09</sup> | 1.84x10 <sup>-06</sup>       | 1.19                  | 0.000275                        | 0.290                                                    |
| Interleukin-15 receptor subunit alpha                             | Q13261     | 1.19 | 1.81x10 <sup>-09</sup> | 1.91x10 <sup>-06</sup>       | 1.09                  | 0.0238                          | 1                                                        |
| Afamin                                                            | P43652     | 0.8  | 1.89x10 <sup>-09</sup> | 1.99x10 <sup>-06</sup>       | 0.87                  | 0.00162                         | 1                                                        |
| Cystatin-D                                                        | P28325     | 1.31 | 1.95x10 <sup>-09</sup> | 2.05x10 <sup>-06</sup>       | 1.09                  | 0.103                           | 1                                                        |
| CD48 antigen                                                      | P09326     | 1.28 | 2.01x10 <sup>-09</sup> | 2.12x10 <sup>-06</sup>       | 1.19                  | 7.78x10 <sup>-05</sup>          | 0.082                                                    |
| Interleukin-1 receptor-like 1                                     | Q01638     | 1.3  | 2.28x10 <sup>-09</sup> | 2.40x10 <sup>-06</sup>       | 1.28                  | 3.10x10 <sup>-08</sup>          | 3.27x10 <sup>-05</sup>                                   |
| Cerebral dopamine neurotrophic factor                             | Q49AH0     | 1.31 | 2.37x10 <sup>-09</sup> | 2.50x10 <sup>-06</sup>       | 1                     | 0.965                           | 1                                                        |
| Growth/differentiation factor 11                                  | O95390     | 0.71 | 2.46x10 <sup>-09</sup> | 2.59x10 <sup>-06</sup>       | 0.74                  | 1.06x10 <sup>-07</sup>          | 0.000112                                                 |
| Brain natriuretic peptide 32                                      | P16860     | 1.21 | 3.13x10 <sup>-09</sup> | 3.30x10 <sup>-06</sup>       | 1.19                  | 1.64x10 <sup>-07</sup>          | 0.000173                                                 |
| Cathepsin Z                                                       | Q9UBR2     | 1.3  | 3.51x10 <sup>-09</sup> | 3.70x10 <sup>-06</sup>       | 1.18                  | 0.000799                        | 0.842                                                    |
| Neurexophilin-1                                                   | P58417     | 0.75 | 4.00x10 <sup>-09</sup> | 4.21x10 <sup>-06</sup>       | 0.82                  | 0.000218                        | 0.230                                                    |
| C-type lectin domain family 4 member M                            | Q9H2X3     | 0.76 | 4.37x10 <sup>-09</sup> | 4.61x10 <sup>-06</sup>       | 0.86                  | 0.00177                         | 1                                                        |
| Prothrombin                                                       | P00734     | 0.79 | 4.41x10 <sup>-09</sup> | 4.65x10 <sup>-06</sup>       | 0.84                  | 6.03x10 <sup>-05</sup>          | 0.0636                                                   |
| Platelet glycoprotein VI                                          | Q9HCN6     | 1.31 | 4.68x10 <sup>-09</sup> | 4.93x10 <sup>-06</sup>       | 1.13                  | 0.0145                          | 1                                                        |
| Immunoglobulin G                                                  | P01857     | 1.32 | 4.89x10 <sup>-09</sup> | 5.16x10 <sup>-06</sup>       | 1.33                  | 8.11x10 <sup>-09</sup>          | 8.55x10 <sup>-06</sup>                                   |
| Layilin                                                           | Q6UX15     | 1.25 | 5.16x10 <sup>-09</sup> | 5.44x10 <sup>-06</sup>       | 0.99                  | 0.837                           | 1                                                        |
| Coagulation factor Xa                                             | P00742     | 0.79 | 6.57x10 <sup>-09</sup> | 6.92x10 <sup>-06</sup>       | 0.82                  | 2.71x10 <sup>-06</sup>          | 0.00285                                                  |
| C-C motif chemokine 23                                            | P55773     | 1.3  | 6.65x10 <sup>-09</sup> | 7.00x10 <sup>-06</sup>       | 1.12                  | 0.0285                          | 1                                                        |
| Tyrosine-protein kinase Yes                                       | P07947     | 1.26 | 7.33x10 <sup>-09</sup> | 7.72x10 <sup>-06</sup>       | 1.21                  | 8.05x10 <sup>-06</sup>          | 0.00848                                                  |

| Protein                                              | UniProt ID | HR   | p-value                | Bonferroni corrected p-value | HR corrected for eGFR | p-value (HR corrected for eGFR) | p-value (HR corrected for eGFR and Bonferroni corrected) |
|------------------------------------------------------|------------|------|------------------------|------------------------------|-----------------------|---------------------------------|----------------------------------------------------------|
| Cathepsin L2                                         | O60911     | 0.75 | 7.94x10 <sup>-09</sup> | 8.36x10 <sup>-06</sup>       | 0.88                  | 0.0170                          | 1                                                        |
| Ficolin-3                                            | O75636     | 0.78 | 7.96x10 <sup>-09</sup> | 8.38x10 <sup>-06</sup>       | 0.85                  | 0.000369                        | 0.389                                                    |
| Dickkopf-like protein 1                              | Q9UK85     | 0.74 | 8.48x10 <sup>-09</sup> | 8.94x10 <sup>-06</sup>       | 0.81                  | 9.78x10 <sup>-05</sup>          | 0.103                                                    |
| Midkine                                              | P21741     | 1.23 | 9.16x10 <sup>-09</sup> | 9.66x10 <sup>-06</sup>       | 1.21                  | 4.29x10 <sup>-07</sup>          | 0.000452                                                 |
| Interleukin-17 receptor C                            | Q8NAC3     | 1.22 | 9.74x10 <sup>-09</sup> | 1.03x10 <sup>-05</sup>       | 1.1                   | 0.0343                          | 1                                                        |
| Phospholipase A2, membrane associated                | P14555     | 1.27 | 9.86x10 <sup>-09</sup> | 1.04x10 <sup>-05</sup>       | 1.23                  | 2.10x10 <sup>-06</sup>          | 0.00221                                                  |
| Alpha-2-HS-glycoprotein                              | P02765     | 0.77 | 1.56x10 <sup>-08</sup> | 1.65x10 <sup>-05</sup>       | 0.85                  | 0.000885                        | 0.933                                                    |
| Ephrin type-B receptor 6                             | O15197     | 1.24 | 1.66x10 <sup>-08</sup> | 1.75x10 <sup>-05</sup>       | 1                     | 0.990                           | 1                                                        |
| Insulin-like growth factor-binding protein 1         | P08833     | 1.29 | 2.24x10 <sup>-08</sup> | 2.36x10 <sup>-05</sup>       | 1.23                  | 1.16x10 <sup>-05</sup>          | 0.0122                                                   |
| Serine protease HTRA2, mitochondrial                 | O43464     | 1.27 | 2.75x10 <sup>-08</sup> | 2.90x10 <sup>-05</sup>       | 1.16                  | 0.00229                         | 1                                                        |
| Ck-beta-8-1                                          | P55773     | 1.34 | 3.18x10 <sup>-08</sup> | 3.35x10 <sup>-05</sup>       | 1.15                  | 0.0145                          | 1                                                        |
| Renin                                                | P00797     | 1.28 | 3.24x10 <sup>-08</sup> | 3.41x10 <sup>-05</sup>       | 1.24                  | 1.52x10 <sup>-06</sup>          | 0.00160                                                  |
| Resistin                                             | Q9HD89     | 1.28 | 3.56x10 <sup>-08</sup> | 3.75x10 <sup>-05</sup>       | 1.06                  | 0.30305                         | 1                                                        |
| Tyrosine-protein kinase transmembrane receptor ROR1  | Q01973     | 1.23 | 4.40x10 <sup>-08</sup> | 4.63x10 <sup>-05</sup>       | 1.08                  | 0.149                           | 1                                                        |
| Tumor necrosis factor receptor superfamily member 9  | Q07011     | 1.18 | 7.87x10 <sup>-08</sup> | 8.30x10 <sup>-05</sup>       | 1.1                   | 0.0129                          | 1                                                        |
| Pappalysin-1                                         | Q13219     | 1.28 | 8.52x10 <sup>-08</sup> | 8.98x10 <sup>-05</sup>       | 1.13                  | 0.0146                          | 1                                                        |
| Bone sialoprotein 2                                  | P21815     | 1.26 | 9.63x10 <sup>-08</sup> | 1.01x10 <sup>-04</sup>       | 1.14                  | 0.00485                         | 1                                                        |
| SHC-transforming protein 1                           | P29353     | 1.22 | 1.26x10 <sup>-07</sup> | 1.33x10 <sup>-04</sup>       | 1.08                  | 0.0939                          | 1                                                        |
| Neuropilin-1                                         | O14786     | 1.21 | 1.32x10 <sup>-07</sup> | 1.39x10 <sup>-04</sup>       | 1.19                  | 4.05x10 <sup>-06</sup>          | 0.00427                                                  |
| Fibroblast growth factor 23                          | Q9GZV9     | 1.18 | 1.62x10 <sup>-07</sup> | 1.70x10 <sup>-04</sup>       | 1.1                   | 0.00536                         | 1                                                        |
| Fibroblast growth factor 20                          | Q9NP95     | 0.74 | 2.03x10 <sup>-07</sup> | 2.14x10 <sup>-04</sup>       | 0.9                   | 0.0768                          | 1                                                        |
| Superoxide dismutase [Mn], mitochondrial             | P04179     | 0.77 | 2.07x10 <sup>-07</sup> | 2.18x10 <sup>-04</sup>       | 0.88                  | 0.0158                          | 1                                                        |
| Interleukin-8                                        | P10145     | 1.18 | 3.26x10 <sup>-07</sup> | 3.43x10 <sup>-04</sup>       | 1.2                   | 2.70x10 <sup>-08</sup>          | 2.85x10 <sup>-05</sup>                                   |
| Nidogen-1                                            | P14543     | 1.27 | 3.75x10 <sup>-07</sup> | 3.95x10 <sup>-04</sup>       | 1.23                  | 4.03x10 <sup>-06</sup>          | 0.00425                                                  |
| Seprase                                              | Q12884     | 0.73 | 4.21x10 <sup>-07</sup> | 4.44x10 <sup>-04</sup>       | 0.79                  | 0.000102                        | 0.108                                                    |
| Tumor necrosis factor receptor superfamily member 19 | Q9NS68     | 1.17 | 4.51x10 <sup>-07</sup> | 4.75x10 <sup>-04</sup>       | 1.03                  | 0.471                           | 1                                                        |
| Oxidized low-density lipoprotein receptor 1          | P78380     | 1.24 | 5.23x10 <sup>-07</sup> | 5.51x10 <sup>-04</sup>       | 1.23                  | 2.03x10 <sup>-06</sup>          | 0.00214                                                  |
| Cytochrome P450 3A4                                  | P08684     | 0.78 | 5.78x10 <sup>-07</sup> | 6.09x10 <sup>-04</sup>       | 0.84                  | 0.000540                        | 0.569                                                    |
| Tenascin                                             | P24821     | 1.26 | 6.31x10 <sup>-07</sup> | 6.66x10 <sup>-04</sup>       | 1.32                  | 2.55x10 <sup>-09</sup>          | 2.69x10 <sup>-06</sup>                                   |
| Malate dehydrogenase, cytoplasmic                    | P40925     | 0.79 | 6.41x10 <sup>-07</sup> | 6.76x10 <sup>-04</sup>       | 0.88                  | 0.00776                         | 1                                                        |
| Insulin-like growth factor-binding protein 7         | Q16270     | 1.26 | 6.67x10 <sup>-07</sup> | 7.03x10 <sup>-04</sup>       | 1.33                  | 1.06x10 <sup>-09</sup>          | 1.11x10 <sup>-06</sup>                                   |
| Muellerian-inhibiting factor                         | P03971     | 0.83 | 7.84x10 <sup>-07</sup> | 8.27x10 <sup>-04</sup>       | 0.88                  | 0.00451                         | 1                                                        |
| BDNF/NT-3 growth factors receptor                    | Q16620     | 0.77 | 8.22x10 <sup>-07</sup> | 8.66x10 <sup>-04</sup>       | 0.86                  | 0.00450                         | 1                                                        |
| Stromal cell-derived factor 1                        | P48061     | 1.26 | 8.71x10 <sup>-07</sup> | 9.18x10 <sup>-04</sup>       | 1.22                  | 5.91x10 <sup>-05</sup>          | 0.0623                                                   |

| Protein                                            | UniProt ID | HR   | p-value                | Bonferroni corrected p-value | HR corrected for eGFR | p-value (HR corrected for eGFR) | p-value (HR corrected for eGFR and Bonferroni corrected) |
|----------------------------------------------------|------------|------|------------------------|------------------------------|-----------------------|---------------------------------|----------------------------------------------------------|
| Complement factor D                                | P00746     | 1.17 | 8.91x10 <sup>-07</sup> | 9.39x10 <sup>-04</sup>       | 1.06                  | 0.229                           | 1                                                        |
| Ectonucleoside triphosphate diphosphohydrolase 5   | O75356     | 0.79 | 9.33x10 <sup>-07</sup> | 9.84x10 <sup>-04</sup>       | 0.85                  | 0.000929                        | 0.979                                                    |
| Carbonic anhydrase 3                               | P07451     | 1.25 | 9.48x10 <sup>-07</sup> | 9.99x10 <sup>-04</sup>       | 1.09                  | 0.0952                          | 1                                                        |
| C-C motif chemokine 7                              | P80098     | 1.22 | 1.05x10 <sup>-06</sup> | 1.10x10 <sup>-03</sup>       | 1.15                  | 0.00125                         | 1                                                        |
| Tumor necrosis factor ligand superfamily member 12 | O43508     | 0.72 | 1.09x10 <sup>-06</sup> | 1.14x10 <sup>-03</sup>       | 0.78                  | 0.000134                        | 0.142                                                    |
| cGMP-dependent 3',5'-cyclic phosphodiesterase      | O00408     | 0.78 | 1.23x10 <sup>-06</sup> | 1.29x10 <sup>-03</sup>       | 0.86                  | 0.00303                         | 1                                                        |
| Alpha-(1,3)-fucosyltransferase 5                   | Q11128     | 1.27 | 1.53x10 <sup>-06</sup> | 1.61x10 <sup>-03</sup>       | 1.23                  | 3.43x10 <sup>-05</sup>          | 0.0362                                                   |
| Plasminogen                                        | P00747     | 0.79 | 1.64x10 <sup>-06</sup> | 1.73x10 <sup>-03</sup>       | 0.85                  | 0.00151                         | 1                                                        |
| Neurogenic locus notch homolog protein 1           | P46531     | 0.81 | 1.78x10 <sup>-06</sup> | 1.88x10 <sup>-03</sup>       | 0.87                  | 0.00225                         | 1                                                        |
| Matrilin-2                                         | O00339     | 1.25 | 1.98x10 <sup>-06</sup> | 2.09x10 <sup>-03</sup>       | 1.03                  | 0.510                           | 1                                                        |
| Tyrosine-protein phosphatase non-receptor type 1   | P18031     | 0.76 | 2.28x10 <sup>-06</sup> | 2.41x10 <sup>-03</sup>       | 0.83                  | 0.00149                         | 1                                                        |
| C-X-C motif chemokine 10                           | P02778     | 1.23 | 2.33x10 <sup>-06</sup> | 2.46x10 <sup>-03</sup>       | 1.21                  | 2.59x10 <sup>-05</sup>          | 0.0273                                                   |
| Heparin cofactor 2                                 | P05546     | 0.81 | 2.50x10 <sup>-06</sup> | 2.64x10 <sup>-03</sup>       | 0.85                  | 0.000310                        | 0.326                                                    |
| Neurogenic locus notch homolog protein 3           | Q9UM47     | 1.2  | 2.52x10 <sup>-06</sup> | 2.66x10 <sup>-03</sup>       | 1.13                  | 0.00582                         | 1                                                        |
| Lipopolysaccharide-binding protein                 | P18428     | 1.27 | 2.56x10 <sup>-06</sup> | 2.70x10 <sup>-03</sup>       | 1.23                  | 5.02x10 <sup>-05</sup>          | 0.0529                                                   |
| Testican-1                                         | Q08629     | 0.79 | 2.74x10 <sup>-06</sup> | 2.89x10 <sup>-03</sup>       | 0.85                  | 0.00197                         | 1                                                        |
| Interleukin-1 receptor type 1                      | P14778     | 1.26 | 2.94x10 <sup>-06</sup> | 3.10x10 <sup>-03</sup>       | 1.18                  | 0.000661                        | 0.696                                                    |
| C-C motif chemokine 3                              | P10147     | 1.17 | 3.03x10 <sup>-06</sup> | 3.19x10 <sup>-03</sup>       | 1.1                   | 0.0131                          | 1                                                        |
| Tumor necrosis factor ligand superfamily member 8  | P32971     | 1.21 | 3.11x10 <sup>-06</sup> | 3.27x10 <sup>-03</sup>       | 1.22                  | 7.46x10 <sup>-07</sup>          | 0.000787                                                 |
| Antithrombin-III                                   | P01008     | 0.83 | 3.44x10 <sup>-06</sup> | 3.62x10 <sup>-03</sup>       | 0.87                  | 0.00130                         | 1                                                        |
| 6-phosphogluconate dehydrogenase, decarboxylating  | P52209     | 0.8  | 3.44x10 <sup>-06</sup> | 3.63x10 <sup>-03</sup>       | 0.92                  | 0.0690                          | 1                                                        |
| Alcohol dehydrogenase [NADP(+)]                    | P14550     | 1.24 | 3.45x10 <sup>-06</sup> | 3.63x10 <sup>-03</sup>       | 1.13                  | 0.0128                          | 1                                                        |
| Opioid-binding protein/cell adhesion molecule      | Q14982     | 0.79 | 3.68x10 <sup>-06</sup> | 3.88x10 <sup>-03</sup>       | 0.81                  | 5.88x10 <sup>-05</sup>          | 0.0620                                                   |
| Intercellular adhesion molecule 5                  | Q9UMF0     | 1.21 | 3.99x10 <sup>-06</sup> | 4.21x10 <sup>-03</sup>       | 1.23                  | 3.65x10 <sup>-07</sup>          | 0.000385                                                 |
| Cystatin-SA                                        | P09228     | 1.24 | 4.61x10 <sup>-06</sup> | 4.86x10 <sup>-03</sup>       | 1.01                  | 0.831                           | 1                                                        |
| Aminoacylase-1                                     | Q03154     | 0.79 | 5.02x10 <sup>-06</sup> | 5.29x10 <sup>-03</sup>       | 0.9                   | 0.0468                          | 1                                                        |
| Ficolin-2                                          | Q15485     | 0.83 | 5.10x10 <sup>-06</sup> | 5.37x10 <sup>-03</sup>       | 0.89                  | 0.00662                         | 1                                                        |
| Insulin-like growth factor 1 receptor              | P08069     | 1.25 | 5.17x10 <sup>-06</sup> | 5.45x10 <sup>-03</sup>       | 1.23                  | 1.51x10 <sup>-05</sup>          | 0.0159                                                   |
| Serine/threonine-protein kinase 17B                | O94768     | 0.79 | 5.45x10 <sup>-06</sup> | 5.75x10 <sup>-03</sup>       | 0.88                  | 0.0156                          | 1                                                        |
| T-lymphocyte surface antigen Ly-9                  | Q9HBG7     | 1.24 | 6.00x10 <sup>-06</sup> | 6.32x10 <sup>-03</sup>       | 1.19                  | 0.000390                        | 0.412                                                    |
| Programmed cell death 1 ligand 1                   | Q9NZQ7     | 1.19 | 6.04x10 <sup>-06</sup> | 6.36x10 <sup>-03</sup>       | 1.15                  | 0.000847                        | 0.893                                                    |
| Carbonic anhydrase 6                               | P23280     | 0.81 | 6.89x10 <sup>-06</sup> | 7.26x10 <sup>-03</sup>       | 0.84                  | 0.000192                        | 0.203                                                    |



| Protein                                                              | UniProt ID       | HR   | p-value                | Bonferroni corrected p-value | HR corrected for eGFR | p-value (HR corrected for eGFR) | p-value (HR corrected for eGFR and Bonferroni corrected) |
|----------------------------------------------------------------------|------------------|------|------------------------|------------------------------|-----------------------|---------------------------------|----------------------------------------------------------|
| Junctional adhesion molecule B                                       | P57087           | 1.18 | 7.15x10 <sup>-06</sup> | 7.54x10 <sup>-03</sup>       | 0.93                  | 0.221                           | 1                                                        |
| Dual specificity mitogen-activated protein kinase kinase 4           | P45985           | 0.82 | 7.19x10 <sup>-06</sup> | 7.58x10 <sup>-03</sup>       | 0.84                  | 0.000168                        | 0.177                                                    |
| gp41 C34 peptide, HIV                                                | Q70626           | 1.2  | 7.41x10 <sup>-06</sup> | 7.81x10 <sup>-03</sup>       | 1.08                  | 0.119                           | 1                                                        |
| Plasminogen activator inhibitor 1                                    | P05121           | 0.8  | 7.54x10 <sup>-06</sup> | 7.95x10 <sup>-03</sup>       | 0.88                  | 0.00669                         | 1                                                        |
| Transmembrane glycoprotein NMB                                       | Q14956           | 1.22 | 8.40x10 <sup>-06</sup> | 8.85x10 <sup>-03</sup>       | 1.18                  | 0.000189                        | 0.199                                                    |
| N-acetyl-D-glucosamine kinase                                        | Q9UJ70           | 1.23 | 9.26x10 <sup>-06</sup> | 9.76x10 <sup>-03</sup>       | 1.31                  | 3.54x10 <sup>-09</sup>          | 3.73x10 <sup>-06</sup>                                   |
| Low affinity immunoglobulin gamma Fc region receptor II-a/b          | P12318<br>P31994 | 1.23 | 1.04x10 <sup>-05</sup> | 1.09x10 <sup>-02</sup>       | 1.22                  | 4.20x10 <sup>-05</sup>          | 0.0443                                                   |
| C-C motif chemokine 4-like                                           | Q8NHW4           | 1.21 | 1.18x10 <sup>-05</sup> | 1.24x10 <sup>-02</sup>       | 1.19                  | 8.30x10 <sup>-05</sup>          | 0.0875                                                   |
| Cathepsin B                                                          | P07858           | 1.22 | 1.27x10 <sup>-05</sup> | 1.33x10 <sup>-02</sup>       | 1.2                   | 3.76x10 <sup>-05</sup>          | 0.0396                                                   |
| Kunitz-type protease inhibitor 2                                     | O43291           | 1.17 | 1.31x10 <sup>-05</sup> | 1.38x10 <sup>-02</sup>       | 1.1                   | 0.0282                          | 1                                                        |
| CD5 antigen-like                                                     | O43866           | 1.21 | 1.52x10 <sup>-05</sup> | 1.60x10 <sup>-02</sup>       | 1.15                  | 0.00110                         | 1                                                        |
| Vascular endothelial growth factor C                                 | P49767           | 1.15 | 1.74x10 <sup>-05</sup> | 1.83x10 <sup>-02</sup>       | 1.08                  | 0.0383                          | 1                                                        |
| Endothelin-converting enzyme 1                                       | P42892           | 0.82 | 1.79x10 <sup>-05</sup> | 1.89x10 <sup>-02</sup>       | 0.83                  | 8.83x10 <sup>-05</sup>          | 0.0931                                                   |
| dCTP pyrophosphatase 1                                               | Q9H773           | 1.24 | 1.80x10 <sup>-05</sup> | 1.90x10 <sup>-02</sup>       | 1.18                  | 0.000937                        | 0.988                                                    |
| Fibrinogen gamma chain                                               | P02679           | 1.23 | 1.81x10 <sup>-05</sup> | 1.90x10 <sup>-02</sup>       | 1.19                  | 0.000237                        | 0.250                                                    |
| Mannose-binding protein C                                            | P11226           | 1.23 | 2.01x10 <sup>-05</sup> | 2.12x10 <sup>-02</sup>       | 1.22                  | 6.49x10 <sup>-05</sup>          | 0.0684                                                   |
| Complement component 1 Q subcomponent-binding protein, mitochondrial | Q07021           | 0.72 | 2.33x10 <sup>-05</sup> | 2.45x10 <sup>-02</sup>       | 0.85                  | 0.0247                          | 1                                                        |
| Mammaglobin-B                                                        | O75556           | 0.79 | 2.33x10 <sup>-05</sup> | 2.46x10 <sup>-02</sup>       | 0.86                  | 0.00616                         | 1                                                        |
| Neutral ceramidase                                                   | Q9NR71           | 0.82 | 2.34x10 <sup>-05</sup> | 2.46x10 <sup>-02</sup>       | 0.88                  | 0.00999                         | 1                                                        |
| von Willebrand factor                                                | P04275           | 1.22 | 2.44x10 <sup>-05</sup> | 2.57x10 <sup>-02</sup>       | 1.18                  | 0.000592                        | 0.624                                                    |
| Dual specificity mitogen-activated protein kinase kinase 2           | P36507           | 1.22 | 2.61x10 <sup>-05</sup> | 2.75x10 <sup>-02</sup>       | 0.99                  | 0.907                           | 1                                                        |
| Calcium/calmodulin-dependent protein kinase type 1                   | Q14012           | 0.82 | 2.64x10 <sup>-05</sup> | 2.78x10 <sup>-02</sup>       | 0.84                  | 0.000198                        | 0.209                                                    |
| Inosine-5'-monophosphate dehydrogenase 2                             | P12268           | 0.79 | 2.94x10 <sup>-05</sup> | 3.09x10 <sup>-02</sup>       | 0.86                  | 0.00667                         | 1                                                        |
| Carboxypeptidase B2                                                  | Q96IY4           | 0.82 | 3.06x10 <sup>-05</sup> | 3.22x10 <sup>-02</sup>       | 0.87                  | 0.00291                         | 1                                                        |
| Retinoic acid receptor responder protein 2                           | Q99969           | 1.21 | 3.61x10 <sup>-05</sup> | 3.81x10 <sup>-02</sup>       | 1.01                  | 0.815                           | 1                                                        |
| Endothelial monocyte-activating polypeptide 2                        | Q12904           | 0.82 | 3.82x10 <sup>-05</sup> | 4.02x10 <sup>-02</sup>       | 0.89                  | 0.0202                          | 1                                                        |
| C-C motif chemokine 28                                               | Q9NRJ3           | 1.21 | 4.03x10 <sup>-05</sup> | 4.25x10 <sup>-02</sup>       | 1.17                  | 0.000951                        | 1                                                        |
| Cell adhesion molecule 1                                             | Q9BY67           | 1.2  | 4.09x10 <sup>-05</sup> | 4.31x10 <sup>-02</sup>       | 1.12                  | 0.0193                          | 1                                                        |
| Macrophage mannose receptor 1                                        | P22897           | 1.22 | 4.44x10 <sup>-05</sup> | 4.68x10 <sup>-02</sup>       | 1.21                  | 3.15x10 <sup>-05</sup>          | 0.0332                                                   |

Below: Proteins that become prognostic of cardiovascular risk only after correction for eGFR

| Protein                                              | UniProt ID | HR   | p-value                | Bonferroni corrected p-value | HR corrected for eGFR | p-value (corrected for eGFR) | p-value (HR corrected for eGFR and Bonferroni corrected) |
|------------------------------------------------------|------------|------|------------------------|------------------------------|-----------------------|------------------------------|----------------------------------------------------------|
| Scavenger receptor cysteine-rich type 1 protein M130 | Q86VB7     | 1.17 | 6.93x10 <sup>-04</sup> | 7.30x10 <sup>-01</sup>       | 1.25                  | 4.13x10 <sup>-06</sup>       | 4.35x10 <sup>-03</sup>                                   |
| Insulin-like growth factor I                         | P05019     | 0.83 | 2.94x10 <sup>-04</sup> | 3.10x10 <sup>-01</sup>       | 0.79                  | 7.50x10 <sup>-06</sup>       | 7.90x10 <sup>-03</sup>                                   |
| P-Selectin                                           | P16109     | 1.2  | 1.46x10 <sup>-04</sup> | 1.54x10 <sup>-01</sup>       | 1.22                  | 1.26x10 <sup>-05</sup>       | 1.33x10 <sup>-02</sup>                                   |
| Hemojuvelin                                          | Q6ZVN8     | 0.92 | 9.25x10 <sup>-02</sup> | 1                            | 0.82                  | 2.57x10 <sup>-05</sup>       | 2.71x10 <sup>-02</sup>                                   |
| Interleukin-6 receptor subunit beta                  | P40189     | 1.17 | 1.09x10 <sup>-03</sup> | 1                            | 1.22                  | 3.56x10 <sup>-05</sup>       | 3.75x10 <sup>-02</sup>                                   |
| Sialic acid-binding Ig-like lectin 7                 | Q9Y286     | 1.1  | 2.77x10 <sup>-02</sup> | 1                            | 1.19                  | 4.64x10 <sup>-05</sup>       | 4.89x10 <sup>-02</sup>                                   |
| Interleukin-18 receptor 1                            | Q13478     | 1.2  | 8.83x10 <sup>-05</sup> | 9.31x10 <sup>-02</sup>       | 1.21                  | 4.67x10 <sup>-05</sup>       | 4.92x10 <sup>-02</sup>                                   |
| Neurexin-1-beta                                      | P58400     | 1.05 | 3.06x10 <sup>-01</sup> | 1                            | 0.81                  | 2.99x10 <sup>-04</sup>       | 3.15x10 <sup>-01</sup>                                   |
| Melanoma-derived growth regulatory protein           | Q16674     | 0.99 | 8.48x10 <sup>-01</sup> | 1                            | 0.82                  | 1.48x10 <sup>-04</sup>       | 1.56x10 <sup>-01</sup>                                   |
| Lysosomal protective protein                         | P10619     | 1.15 | 2.44x10 <sup>-03</sup> | 1                            | 1.2                   | 4.87x10 <sup>-05</sup>       | 5.13x10 <sup>-02</sup>                                   |
| Gelsolin                                             | P06396     | 0.93 | 1.02x10 <sup>-01</sup> | 1                            | 0.83                  | 5.14x10 <sup>-05</sup>       | 5.42x10 <sup>-02</sup>                                   |
| Cystatin-M                                           | Q15828     | 1.13 | 8.01x10 <sup>-03</sup> | 1                            | 0.85                  | 4.24x10 <sup>-03</sup>       | 1.00x10 <sup>+00</sup>                                   |

Table S3. Shown at the top of this supplemental table are 196 proteins associated with cardiovascular risk in the Heart and Soul cohort with unadjusted hazard ratios (HR) that were significant at Bonferroni corrected p-value < 0.05 (correction was based on all 1054 proteins measured). Also shown are HRs and their p-values after correction for eGFR. Also shown in the bottom portion of this supplemental table are 12 proteins that become prognostic of cardiovascular risk only after correction for eGFR

**Table S4. Spearman rho correlations and p-values for the 100 proteins with the strongest rho coefficients in the Heart and Soul cohort, shown with rho correlations and p-values for the same proteins reported in the Lund cohort (98 of 100 proteins which were measured in both cohorts are shown in the Table). (Lund cohort data: DOI: 10.1002/prca.201700067)**

| Protein                                               | UniProt ID | Heart and Soul rho | Heart and Soul p-value  | Lund rho | Lund p-value            |
|-------------------------------------------------------|------------|--------------------|-------------------------|----------|-------------------------|
| Cystatin-C                                            | P01034     | -0.74              | 1.12x10 <sup>-163</sup> | -0.85    | 3.86x10 <sup>-101</sup> |
| Insulin-like growth factor-binding protein 6          | P24592     | -0.7               | 2.86x10 <sup>-138</sup> | -0.81    | 7.00x10 <sup>-86</sup>  |
| Tumor necrosis factor receptor superfamily member 1A  | P19438     | -0.65              | 2.51x10 <sup>-114</sup> | -0.6     | 8.65x10 <sup>-37</sup>  |
| Neuroblastoma suppressor of tumorigenicity 1          | P41271     | -0.64              | 2.29x10 <sup>-109</sup> | -0.79    | 9.95x10 <sup>-79</sup>  |
| Beta-2-microglobulin                                  | P61769     | -0.63              | 1.11x10 <sup>-102</sup> | -0.76    | 6.18x10 <sup>-69</sup>  |
| Tumor necrosis factor receptor superfamily member 19L | Q969Z4     | -0.62              | 1.01x10 <sup>-100</sup> | -0.56    | 4.44x10 <sup>-32</sup>  |
| Cathepsin H                                           | P09668     | -0.61              | 1.51x10 <sup>-95</sup>  | -0.31    | 2.16x10 <sup>-09</sup>  |
| Follistatin-related protein 3                         | O95633     | -0.58              | 7.07x10 <sup>-87</sup>  | -0.79    | 1.78x10 <sup>-78</sup>  |
| Endothelial cell-selective adhesion molecule          | Q96AP7     | -0.58              | 4.98x10 <sup>-86</sup>  | -0.54    | 1.76x10 <sup>-28</sup>  |
| Adapter molecule crk                                  | P46108     | -0.58              | 2.86x10 <sup>-85</sup>  | -0.44    | 2.20x10 <sup>-18</sup>  |
| Cerebral dopamine neurotrophic factor                 | Q49AH0     | -0.57              | 3.10x10 <sup>-81</sup>  | -0.71    | 4.68x10 <sup>-56</sup>  |
| RGM domain family member B                            | Q6NW40     | -0.54              | 1.43x10 <sup>-73</sup>  | -0.51    | 2.44x10 <sup>-25</sup>  |
| Ephrin-A5                                             | P52803     | -0.53              | 3.39x10 <sup>-70</sup>  | -0.74    | 1.65x10 <sup>-64</sup>  |
| Trefoil factor 3                                      | Q07654     | -0.53              | 6.07x10 <sup>-69</sup>  | -0.76    | 2.12x10 <sup>-70</sup>  |
| Tumor necrosis factor receptor superfamily member 27  | Q9HAV5     | -0.53              | 1.33x10 <sup>-67</sup>  | -0.27    | 1.56x10 <sup>-07</sup>  |
| Endostatin                                            | P39060     | -0.52              | 1.03x10 <sup>-66</sup>  | -0.75    | 1.09x10 <sup>-66</sup>  |
| Ephrin-A4                                             | P52798     | -0.52              | 3.27x10 <sup>-66</sup>  | -0.6     | 2.71x10 <sup>-36</sup>  |
| Netrin receptor UNC5C                                 | O95185     | -0.51              | 1.43x10 <sup>-64</sup>  | -0.69    | 1.36x10 <sup>-53</sup>  |
| Ephrin type-B receptor 6                              | O15197     | -0.51              | 3.98x10 <sup>-64</sup>  | -0.61    | 4.16x10 <sup>-38</sup>  |
| Tumor necrosis factor receptor superfamily member 1B  | P20333     | -0.51              | 1.40x10 <sup>-63</sup>  | -0.29    | 1.19x10 <sup>-08</sup>  |
| Glutathione S-transferase P                           | P09211     | -0.51              | 5.89x10 <sup>-62</sup>  | -0.25    | 1.33x10 <sup>-06</sup>  |
| C-C motif chemokine 14                                | Q16627     | -0.5               | 3.76x10 <sup>-61</sup>  | -0.65    | 1.70x10 <sup>-45</sup>  |
| Macrophage-capping protein                            | P40121     | -0.5               | 6.26x10 <sup>-61</sup>  | -0.24    | 2.49x10 <sup>-06</sup>  |
| Junctional adhesion molecule B                        | P57087     | -0.5               | 2.76x10 <sup>-59</sup>  | 0.09     | 9.19x10 <sup>-02</sup>  |
| Layilin                                               | Q6UX15     | -0.49              | 1.56x10 <sup>-57</sup>  | -0.22    | 2.78x10 <sup>-05</sup>  |
| Ephrin type-A receptor 2                              | P29317     | -0.49              | 2.11x10 <sup>-57</sup>  | -0.63    | 8.37x10 <sup>-42</sup>  |
| Tyrosine-protein kinase transmembrane receptor ROR1   | Q01973     | -0.48              | 2.10x10 <sup>-56</sup>  | -0.51    | 3.67x10 <sup>-25</sup>  |
| Scavenger receptor class F member 1                   | Q14162     | -0.47              | 1.69x10 <sup>-53</sup>  | -0.12    | 2.40x10 <sup>-02</sup>  |
| Fatty acid-binding protein, heart                     | P05413     | -0.47              | 2.37x10 <sup>-52</sup>  | -0.5     | 1.08x10 <sup>-24</sup>  |
| Testican-2                                            | Q92563     | 0.46               | 2.58x10 <sup>-51</sup>  | 0.42     | 6.64x10 <sup>-17</sup>  |
| Netrin receptor UNC5D                                 | Q6UXZ4     | -0.46              | 3.25x10 <sup>-49</sup>  | -0.55    | 1.22x10 <sup>-29</sup>  |

| <b>Protein</b>                                             | <b>UniProt ID</b> | <b>Heart and Soul rho</b> | <b>Heart and Soul p-value</b> | <b>Lund rho</b> | <b>Lund p-value</b>    |
|------------------------------------------------------------|-------------------|---------------------------|-------------------------------|-----------------|------------------------|
| Myoglobin                                                  | P02144            | -0.45                     | 4.71x10 <sup>-49</sup>        | -0.42           | 1.17x10 <sup>-16</sup> |
| Tumor necrosis factor receptor superfamily member 19       | Q9NS68            | -0.45                     | 3.70x10 <sup>-47</sup>        | -0.57           | 1.93x10 <sup>-32</sup> |
| Elafin                                                     | P19957            | -0.45                     | 6.13x10 <sup>-47</sup>        | -0.69           | 1.48x10 <sup>-52</sup> |
| Epidermal growth factor receptor                           | P00533            | 0.44                      | 1.96x10 <sup>-46</sup>        | 0.25            | 1.70x10 <sup>-06</sup> |
| Interleukin-15 receptor subunit alpha                      | Q13261            | -0.44                     | 8.60x10 <sup>-46</sup>        | -0.24           | 4.38x10 <sup>-06</sup> |
| Receptor tyrosine-protein kinase erbB-3                    | P21860            | 0.43                      | 4.03x10 <sup>-44</sup>        | 0.1             | 5.10x10 <sup>-02</sup> |
| Metalloproteinase inhibitor 1                              | P01033            | -0.43                     | 4.76x10 <sup>-44</sup>        | -0.25           | 8.89x10 <sup>-07</sup> |
| Antileukoproteinase                                        | P03973            | -0.43                     | 1.81x10 <sup>-42</sup>        | -0.64           | 9.83x10 <sup>-44</sup> |
| Cystatin-M                                                 | Q15828            | -0.42                     | 3.97x10 <sup>-41</sup>        | -0.65           | 8.24x10 <sup>-45</sup> |
| Cathepsin L2                                               | O60911            | 0.42                      | 1.66x10 <sup>-40</sup>        | 0.31            | 2.83x10 <sup>-09</sup> |
| Chordin-like protein 1                                     | Q9BU40            | -0.41                     | 7.30x10 <sup>-40</sup>        | -0.46           | 9.84x10 <sup>-21</sup> |
| Complement factor D                                        | P00746            | -0.41                     | 8.38x10 <sup>-40</sup>        | -0.08           | 1.31x10 <sup>-01</sup> |
| Coiled-coil domain-containing protein 80                   | Q76M96            | -0.41                     | 9.08x10 <sup>-40</sup>        | -0.45           | 6.62x10 <sup>-20</sup> |
| Delta-like protein 1                                       | O00548            | -0.41                     | 1.12x10 <sup>-39</sup>        | -0.4            | 4.42x10 <sup>-15</sup> |
| Complement decay-accelerating factor                       | P08174            | -0.41                     | 2.69x10 <sup>-39</sup>        | -0.64           | 7.85x10 <sup>-43</sup> |
| Hepatitis A virus cellular receptor 2                      | Q8TDQ0            | -0.41                     | 1.35x10 <sup>-38</sup>        | -0.52           | 9.77x10 <sup>-27</sup> |
| Alpha-2-antiplasmin                                        | P08697            | 0.41                      | 1.42x10 <sup>-38</sup>        | 0.22            | 3.01x10 <sup>-05</sup> |
| Tumor necrosis factor ligand superfamily member 15         | O95150            | -0.4                      | 3.90x10 <sup>-38</sup>        | -0.47           | 3.16x10 <sup>-21</sup> |
| Neurexin-1-beta                                            | P58400            | -0.4                      | 4.40x10 <sup>-38</sup>        | -0.32           | 2.99x10 <sup>-10</sup> |
| Tumor necrosis factor receptor superfamily member 21       | O75509            | -0.4                      | 1.62x10 <sup>-37</sup>        | -0.53           | 3.75x10 <sup>-28</sup> |
| Ck-beta-8-1                                                | P55773            | -0.4                      | 1.80x10 <sup>-36</sup>        | -0.34           | 2.43x10 <sup>-11</sup> |
| Neurexin-3-beta                                            | Q9HDB5            | -0.39                     | 5.94x10 <sup>-36</sup>        | -0.57           | 2.06x10 <sup>-33</sup> |
| Cystatin-SA                                                | P09228            | -0.38                     | 2.99x10 <sup>-34</sup>        | -0.53           | 9.21x10 <sup>-28</sup> |
| Bone morphogenetic protein 1                               | P13497            | 0.38                      | 6.44x10 <sup>-34</sup>        | 0.1             | 6.40x10 <sup>-02</sup> |
| Kallikrein-11                                              | Q9UBX7            | -0.38                     | 6.96x10 <sup>-34</sup>        | -0.39           | 5.05x10 <sup>-15</sup> |
| Platelet-activating factor acetylhydrolase IB subunit beta | P68402            | -0.38                     | 1.05x10 <sup>-33</sup>        | -0.26           | 3.55x10 <sup>-07</sup> |
| C-C motif chemokine 23                                     | P55773            | -0.38                     | 1.05x10 <sup>-33</sup>        | -0.35           | 9.05x10 <sup>-12</sup> |
| Macrophage metalloelastase                                 | P39900            | -0.38                     | 1.22x10 <sup>-33</sup>        | -0.27           | 2.53x10 <sup>-07</sup> |
| Endoplasmic reticulum resident protein 29                  | P30040            | -0.38                     | 1.61x10 <sup>-33</sup>        | -0.52           | 4.72x10 <sup>-26</sup> |
| SLIT and NTRK-like protein 5                               | O94991            | -0.38                     | 4.63x10 <sup>-33</sup>        | -0.35           | 1.00x10 <sup>-11</sup> |
| Transforming growth factor beta receptor type 3            | Q03167            | -0.38                     | 7.66x10 <sup>-33</sup>        | -0.6            | 5.17x10 <sup>-37</sup> |
| Insulin-like growth factor-binding protein 2               | P18065            | -0.37                     | 2.00x10 <sup>-32</sup>        | -0.48           | 1.42x10 <sup>-22</sup> |
| Vascular endothelial growth factor receptor 2              | P35968            | 0.37                      | 1.48x10 <sup>-31</sup>        | 0.16            | 1.92x10 <sup>-03</sup> |

| Protein                                                           | UniProt ID | Heart and Soul rho | Heart and Soul p-value | Lund rho | Lund p-value           |
|-------------------------------------------------------------------|------------|--------------------|------------------------|----------|------------------------|
| Dual 3',5'-cyclic-AMP and -GMP phosphodiesterase 11A              | Q9HCR9     | 0.37               | 2.03x10 <sup>-31</sup> | 0.21     | 5.51x10 <sup>-05</sup> |
| Matrilysin                                                        | P09237     | -0.37              | 4.55x10 <sup>-31</sup> | -0.56    | 2.10x10 <sup>-31</sup> |
| Dual specificity mitogen-activated protein kinase kinase 2        | P36507     | -0.36              | 1.00x10 <sup>-30</sup> | -0.37    | 3.46x10 <sup>-13</sup> |
| Retinoic acid receptor responder protein 2                        | Q99969     | -0.36              | 1.12x10 <sup>-30</sup> | -0.38    | 3.83x10 <sup>-14</sup> |
| Cell adhesion molecule 3                                          | Q8N126     | -0.36              | 1.70x10 <sup>-30</sup> | -0.27    | 2.78x10 <sup>-07</sup> |
| A disintegrin and metalloproteinase with thrombospondin motifs 13 | Q76LX8     | 0.36               | 5.02x10 <sup>-30</sup> | 0.2      | 9.67x10 <sup>-05</sup> |
| Pappalysin-1                                                      | Q13219     | -0.36              | 8.10x10 <sup>-30</sup> | -0.37    | 2.29x10 <sup>-13</sup> |
| Resistin                                                          | Q9HD89     | -0.36              | 9.52x10 <sup>-30</sup> | -0.32    | 2.59x10 <sup>-10</sup> |
| Tissue Factor                                                     | P13726     | -0.36              | 1.18x10 <sup>-29</sup> | -0.48    | 1.81x10 <sup>-22</sup> |
| Cystatin-D                                                        | P28325     | -0.36              | 1.91x10 <sup>-29</sup> | -0.48    | 5.92x10 <sup>-22</sup> |
| Cell adhesion molecule-related/down-regulated by oncogenes        | Q4KMG0     | 0.35               | 5.31x10 <sup>-29</sup> | 0.18     | 4.18x10 <sup>-04</sup> |
| Interleukin-17 receptor C                                         | Q8NAC3     | -0.35              | 1.30x10 <sup>-28</sup> | -0.38    | 6.16x10 <sup>-14</sup> |
| Cystatin-SN                                                       | P01037     | -0.35              | 4.37x10 <sup>-28</sup> | -0.49    | 1.48x10 <sup>-23</sup> |
| Carbonic anhydrase 3                                              | P07451     | -0.35              | 6.17x10 <sup>-28</sup> | -0.48    | 9.33x10 <sup>-23</sup> |
| Kallikrein-8                                                      | O60259     | -0.35              | 8.80x10 <sup>-28</sup> | -0.46    | 1.92x10 <sup>-20</sup> |
| Fibroblast growth factor 20                                       | Q9NP95     | 0.35               | 1.17x10 <sup>-27</sup> | 0.16     | 1.87x10 <sup>-03</sup> |
| Melanoma-derived growth regulatory protein                        | Q16674     | -0.34              | 2.30x10 <sup>-26</sup> | -0.32    | 6.53x10 <sup>-10</sup> |
| Ciliary neurotrophic factor receptor subunit alpha                | P26992     | -0.33              | 5.32x10 <sup>-26</sup> | -0.64    | 5.07x10 <sup>-44</sup> |
| Urokinase plasminogen activator surface receptor                  | Q03405     | -0.33              | 1.17x10 <sup>-25</sup> | -0.33    | 1.46x10 <sup>-10</sup> |
| Tumor necrosis factor receptor superfamily member EDAR            | Q9UNE0     | -0.33              | 3.60x10 <sup>-25</sup> | 0.02     | 7.15x10 <sup>-01</sup> |
| Interleukin-19                                                    | Q9UHD0     | 0.33               | 5.40x10 <sup>-25</sup> | -0.11    | 4.34x10 <sup>-02</sup> |
| Interleukin-16                                                    | Q14005     | -0.33              | 1.23x10 <sup>-24</sup> | -0.03    | 6.22x10 <sup>-01</sup> |
| Tumor necrosis factor receptor superfamily member 9               | Q07011     | -0.33              | 1.29x10 <sup>-24</sup> | -0.21    | 7.15x10 <sup>-05</sup> |
| Angiostatin                                                       | P00747     | 0.32               | 5.15x10 <sup>-24</sup> | 0.01     | 9.12x10 <sup>-01</sup> |
| Vascular endothelial growth factor A                              | P15692     | -0.32              | 1.72x10 <sup>-23</sup> | -0.35    | 9.34x10 <sup>-12</sup> |
| Matrilin-2                                                        | O00339     | -0.32              | 2.73x10 <sup>-23</sup> | -0.59    | 1.81x10 <sup>-35</sup> |
| NudC domain-containing protein 3                                  | Q8IVD9     | -0.31              | 7.58x10 <sup>-23</sup> | -0.09    | 8.73x10 <sup>-02</sup> |
| Pancreatic hormone                                                | P01298     | -0.31              | 1.44x10 <sup>-22</sup> | -0.31    | 2.71x10 <sup>-09</sup> |
| 6-phosphogluconate dehydrogenase, decarboxylating                 | P52209     | 0.31               | 1.86x10 <sup>-22</sup> | 0.21     | 4.50x10 <sup>-05</sup> |
| SHC-transforming protein 1                                        | P29353     | -0.31              | 2.68x10 <sup>-22</sup> | 0.01     | 8.98x10 <sup>-01</sup> |
| Proto-oncogene tyrosine-protein kinase receptor Ret               | P07949     | 0.31               | 2.80x10 <sup>-22</sup> | 0.18     | 6.59x10 <sup>-04</sup> |
| OX-2 membrane glycoprotein                                        | P41217     | -0.31              | 3.21x10 <sup>-22</sup> | -0.04    | 4.68x10 <sup>-01</sup> |

| <b>Protein</b>           | <b>UniProt ID</b> | <b>Heart and Soul<br/>rho</b> | <b>Heart and Soul<br/>p-value</b> | <b>Lund<br/>rho</b> | <b>Lund<br/>p-value</b> |
|--------------------------|-------------------|-------------------------------|-----------------------------------|---------------------|-------------------------|
| Ephrin type-A receptor 1 | P21709            | -0.31                         | $8.34 \times 10^{-22}$            | -0.51               | $4.20 \times 10^{-25}$  |
| Agouti-related protein   | O00253            | -0.31                         | $1.16 \times 10^{-21}$            | -0.28               | $4.68 \times 10^{-08}$  |

**Table S5. Eighty-four proteins associated with cardiovascular risk in the Heart and Soul cohort, in participants with eGFR  $\geq$  60 ml/min/1.73m<sup>2</sup> (non-CKD patients).**

| Protein                                              | UniProt ID | HR   | p-value                | Bonferroni corrected p-value |
|------------------------------------------------------|------------|------|------------------------|------------------------------|
| Thrombospondin-2                                     | P35442     | 1.62 | $<2.2 \times 10^{-16}$ | $<2.2 \times 10^{-16}$       |
| Macrophage metalloelastase                           | P39900     | 1.58 | $4.22 \times 10^{-15}$ | $4.45 \times 10^{-12}$       |
| Epidermal growth factor receptor                     | P00533     | 0.63 | $4.87 \times 10^{-14}$ | $5.14 \times 10^{-11}$       |
| Beta-Ala-His dipeptidase                             | Q96KN2     | 0.7  | $2.26 \times 10^{-13}$ | $2.38 \times 10^{-10}$       |
| Angiopoietin-2                                       | O15123     | 1.52 | $3.00 \times 10^{-13}$ | $3.16 \times 10^{-10}$       |
| Complement component C7                              | P10643     | 1.43 | $3.19 \times 10^{-13}$ | $3.36 \times 10^{-10}$       |
| Spondin-1                                            | Q9HCB6     | 1.46 | $8.46 \times 10^{-13}$ | $8.91 \times 10^{-10}$       |
| Matrilysin                                           | P09237     | 1.48 | $3.30 \times 10^{-12}$ | $3.47 \times 10^{-09}$       |
| Growth hormone receptor                              | P10912     | 0.66 | $4.56 \times 10^{-12}$ | $4.81 \times 10^{-09}$       |
| Beta-2-microglobulin                                 | P61769     | 1.46 | $4.67 \times 10^{-12}$ | $4.92 \times 10^{-09}$       |
| Cathepsin H                                          | P09668     | 1.48 | $7.45 \times 10^{-12}$ | $7.85 \times 10^{-09}$       |
| Alpha-2-antiplasmin                                  | P08697     | 0.68 | $2.46 \times 10^{-11}$ | $2.59 \times 10^{-08}$       |
| Tumor necrosis factor receptor superfamily member 1B | P20333     | 1.46 | $6.12 \times 10^{-11}$ | $6.45 \times 10^{-08}$       |
| Hepatitis A virus cellular receptor 2                | Q8TDQ0     | 1.46 | $7.50 \times 10^{-11}$ | $7.90 \times 10^{-08}$       |
| Follistatin-related protein 3                        | O95633     | 1.48 | $7.65 \times 10^{-11}$ | $8.06 \times 10^{-08}$       |
| Brain-specific serine protease 4                     | Q9GZN4     | 1.4  | $1.72 \times 10^{-10}$ | $1.81 \times 10^{-07}$       |
| Delta-like protein 1                                 | O00548     | 1.36 | $1.90 \times 10^{-10}$ | $2.01 \times 10^{-07}$       |
| Metalloproteinase inhibitor 1                        | P01033     | 1.26 | $1.92 \times 10^{-10}$ | $2.02 \times 10^{-07}$       |
| Insulin-like growth factor-binding protein 2         | P18065     | 1.47 | $2.54 \times 10^{-10}$ | $2.68 \times 10^{-07}$       |
| Interleukin-18-binding protein                       | O95998     | 1.46 | $2.96 \times 10^{-10}$ | $3.12 \times 10^{-07}$       |
| Ephrin type-B receptor 2                             | P29323     | 1.46 | $4.51 \times 10^{-10}$ | $4.75 \times 10^{-07}$       |
| Vitamin K-dependent protein C                        | P04070     | 0.73 | $5.39 \times 10^{-10}$ | $5.68 \times 10^{-07}$       |

| <b>Protein</b>                                            | <b>UniProt ID</b> | <b>HR</b> | <b>p-value</b>         | <b>Bonferroni corrected p-value</b> |
|-----------------------------------------------------------|-------------------|-----------|------------------------|-------------------------------------|
| Protein jagged-1                                          | P78504            | 1.43      | 1.71x10 <sup>-09</sup> | 1.81x10 <sup>-06</sup>              |
| Cystatin-C                                                | P01034            | 1.45      | 2.02x10 <sup>-09</sup> | 2.13x10 <sup>-06</sup>              |
| Ephrin type-A receptor 2                                  | P29317            | 1.37      | 2.23x10 <sup>-09</sup> | 2.35x10 <sup>-06</sup>              |
| Ephrin-A4                                                 | P52798            | 1.43      | 2.80x10 <sup>-09</sup> | 2.95x10 <sup>-06</sup>              |
| Neuroblastoma suppressor of tumorigenicity 1              | P41271            | 1.37      | 4.73x10 <sup>-09</sup> | 4.99x10 <sup>-06</sup>              |
| Interleukin-1 receptor-like 1                             | Q01638            | 1.36      | 2.08x10 <sup>-08</sup> | 2.20x10 <sup>-05</sup>              |
| Midkine                                                   | P21741            | 1.26      | 3.21x10 <sup>-08</sup> | 3.38x10 <sup>-05</sup>              |
| Cadherin-3                                                | P22223            | 0.71      | 4.87x10 <sup>-08</sup> | 5.13x10 <sup>-05</sup>              |
| Angiopoietin-related protein 4                            | Q9BY76            | 1.28      | 5.57x10 <sup>-08</sup> | 5.87x10 <sup>-05</sup>              |
| Scavenger receptor class F member 1                       | Q14162            | 1.28      | 6.09x10 <sup>-08</sup> | 6.42x10 <sup>-05</sup>              |
| Insulin-like growth factor-binding protein 7              | Q16270            | 1.36      | 6.76x10 <sup>-08</sup> | 7.13x10 <sup>-05</sup>              |
| Creatine kinase M-type:Creatine kinase B-type heterodimer | P12277 P06732     | 0.7       | 8.24x10 <sup>-08</sup> | 8.68x10 <sup>-05</sup>              |
| Immunoglobulin G                                          | P01857            | 1.38      | 9.07x10 <sup>-08</sup> | 9.56x10 <sup>-05</sup>              |
| Creatine kinase M-type                                    | P06732            | 0.69      | 9.89x10 <sup>-08</sup> | 1.04x10 <sup>-04</sup>              |
| C-X-C motif chemokine 13                                  | O43927            | 1.27      | 1.55x10 <sup>-07</sup> | 1.64x10 <sup>-04</sup>              |
| Complement component C9                                   | P02748            | 1.42      | 1.78x10 <sup>-07</sup> | 1.88x10 <sup>-04</sup>              |
| Stanniocalcin-1                                           | P52823            | 1.34      | 1.87x10 <sup>-07</sup> | 1.97x10 <sup>-04</sup>              |
| SLAM family member 5                                      | Q9UIB8            | 1.24      | 2.82x10 <sup>-07</sup> | 2.97x10 <sup>-04</sup>              |
| C-C motif chemokine 18                                    | P55774            | 1.35      | 3.15x10 <sup>-07</sup> | 3.32x10 <sup>-04</sup>              |
| Tumor necrosis factor receptor superfamily member 19L     | Q969Z4            | 1.32      | 3.81x10 <sup>-07</sup> | 4.01x10 <sup>-04</sup>              |
| Troponin I, cardiac muscle                                | P19429            | 1.24      | 5.15x10 <sup>-07</sup> | 5.43x10 <sup>-04</sup>              |
| Heat shock 70 kDa protein 1A/1B                           | P08107            | 1.32      | 8.43x10 <sup>-07</sup> | 8.88x10 <sup>-04</sup>              |
| Chordin-like protein 1                                    | Q9BU40            | 1.34      | 9.40x10 <sup>-07</sup> | 9.90x10 <sup>-04</sup>              |
| Netrin receptor UNC5C                                     | O95185            | 1.32      | 1.09x10 <sup>-06</sup> | 1.15x10 <sup>-03</sup>              |



| Protein                                                    | UniProt ID     | HR   | p-value                | Bonferroni corrected p-value |
|------------------------------------------------------------|----------------|------|------------------------|------------------------------|
| Low affinity immunoglobulin gamma Fc region receptor III-B | O75015         | 1.32 | 1.12x10 <sup>-06</sup> | 1.18x10 <sup>-03</sup>       |
| Tenascin                                                   | P24821         | 1.34 | 1.14x10 <sup>-06</sup> | 1.20x10 <sup>-03</sup>       |
| Vascular endothelial growth factor A                       | P15692         | 1.34 | 1.28x10 <sup>-06</sup> | 1.35x10 <sup>-03</sup>       |
| Growth/differentiation factor 11                           | O95390         | 0.69 | 1.76x10 <sup>-06</sup> | 1.85x10 <sup>-03</sup>       |
| Alpha-1-antichymotrypsin complex                           | P07288, P01011 | 1.3  | 2.42x10 <sup>-06</sup> | 2.55x10 <sup>-03</sup>       |
| Tissue Factor                                              | P13726         | 1.19 | 2.56x10 <sup>-06</sup> | 2.70x10 <sup>-03</sup>       |
| Periostin                                                  | Q15063         | 1.33 | 3.73x10 <sup>-06</sup> | 3.93x10 <sup>-03</sup>       |
| Coagulation factor Xa                                      | P00742         | 0.79 | 3.88x10 <sup>-06</sup> | 4.09x10 <sup>-03</sup>       |
| N-acetyl-D-glucosamine kinase                              | Q9UJ70         | 1.31 | 4.24x10 <sup>-06</sup> | 4.47x10 <sup>-03</sup>       |
| Macrophage-capping protein                                 | P40121         | 1.23 | 4.49x10 <sup>-06</sup> | 4.73x10 <sup>-03</sup>       |
| Bone morphogenetic protein 1                               | P13497         | 0.77 | 4.49x10 <sup>-06</sup> | 4.73x10 <sup>-03</sup>       |
| Kallistatin                                                | P29622         | 0.77 | 5.95x10 <sup>-06</sup> | 6.27x10 <sup>-03</sup>       |
| Lymphocyte activation gene 3 protein                       | P18627         | 1.31 | 6.80x10 <sup>-06</sup> | 7.16x10 <sup>-03</sup>       |
| Urokinase plasminogen activator surface receptor           | Q03405         | 1.22 | 6.86x10 <sup>-06</sup> | 7.23x10 <sup>-03</sup>       |
| Programmed cell death 1 ligand 1                           | Q9NZQ7         | 1.25 | 7.83x10 <sup>-06</sup> | 8.25x10 <sup>-03</sup>       |
| Neuroigin-4, X-linked                                      | Q8N0W4         | 1.23 | 8.18x10 <sup>-06</sup> | 8.62x10 <sup>-03</sup>       |
| C-C motif chemokine 4-like                                 | Q8NHW4         | 1.27 | 8.55x10 <sup>-06</sup> | 9.01x10 <sup>-03</sup>       |
| Prothrombin                                                | P00734         | 0.8  | 1.02x10 <sup>-05</sup> | 1.08x10 <sup>-02</sup>       |
| Cell adhesion molecule-related/down-regulated by oncogenes | Q4KMG0         | 0.77 | 1.08x10 <sup>-05</sup> | 1.14x10 <sup>-02</sup>       |
| Kallikrein-7                                               | P49862         | 0.75 | 1.11x10 <sup>-05</sup> | 1.17x10 <sup>-02</sup>       |
| Fibroblast growth factor 20                                | Q9NP95         | 0.73 | 1.31x10 <sup>-05</sup> | 1.38x10 <sup>-02</sup>       |

| <b>Protein</b>                                       | <b>UniProt ID</b> | <b>HR</b> | <b>p-value</b>         | <b>Bonferroni corrected p-value</b> |
|------------------------------------------------------|-------------------|-----------|------------------------|-------------------------------------|
| C-C motif chemokine 14                               | Q16627            | 1.32      | 1.36x10 <sup>-05</sup> | 1.44x10 <sup>-02</sup>              |
| Leucine-rich repeat transmembrane protein FLRT1      | Q9NZU1            | 0.67      | 1.59x10 <sup>-05</sup> | 1.68x10 <sup>-02</sup>              |
| Granzyme A                                           | P12544            | 1.28      | 1.71x10 <sup>-05</sup> | 1.80x10 <sup>-02</sup>              |
| Proto-oncogene tyrosine-protein kinase receptor Ret  | P07949            | 0.74      | 1.97x10 <sup>-05</sup> | 2.07x10 <sup>-02</sup>              |
| Neuropilin-1                                         | O14786            | 1.21      | 2.02x10 <sup>-05</sup> | 2.13x10 <sup>-02</sup>              |
| P-Selectin                                           | P16109            | 1.29      | 2.38x10 <sup>-05</sup> | 2.51x10 <sup>-02</sup>              |
| Plasma kallikrein                                    | P03952            | 0.79      | 2.53x10 <sup>-05</sup> | 2.67x10 <sup>-02</sup>              |
| Angiostatin                                          | P00747            | 0.77      | 2.80x10 <sup>-05</sup> | 2.95x10 <sup>-02</sup>              |
| Tumor necrosis factor receptor superfamily member 27 | Q9HAV5            | 1.16      | 2.81x10 <sup>-05</sup> | 2.96x10 <sup>-02</sup>              |
| Insulin-like growth factor 1 receptor                | P08069            | 1.3       | 2.84x10 <sup>-05</sup> | 2.99x10 <sup>-02</sup>              |
| Intercellular adhesion molecule 5                    | Q9UMF0            | 1.23      | 2.96x10 <sup>-05</sup> | 3.11x10 <sup>-02</sup>              |
| Brain natriuretic peptide 32                         | P16860            | 1.18      | 3.03x10 <sup>-05</sup> | 3.20x10 <sup>-02</sup>              |
| Lipopolysaccharide-binding protein                   | P18428            | 1.3       | 3.40x10 <sup>-05</sup> | 3.59x10 <sup>-02</sup>              |
| Alpha-(1,3)-fucosyltransferase 5                     | Q11128            | 1.3       | 3.69x10 <sup>-05</sup> | 3.89x10 <sup>-02</sup>              |
| Interleukin-8                                        | P10145            | 1.18      | 3.74x10 <sup>-05</sup> | 3.94x10 <sup>-02</sup>              |
| Phospholipase A2, membrane associated                | P14555            | 1.24      | 3.82x10 <sup>-05</sup> | 4.02x10 <sup>-02</sup>              |
| Renin                                                | P00797            | 1.26      | 4.15x10 <sup>-05</sup> | 4.37x10 <sup>-02</sup>              |

**Figure S1. Hazard ratios and confidence intervals for proteins prognostic of cardiovascular risk in the settings of eGFR<60 ml/min/1.73m<sup>2</sup>, eGFR≥60 ml/min/1.73m<sup>2</sup> and for all participants in Heart and Soul, regardless of eGFR (HS).**

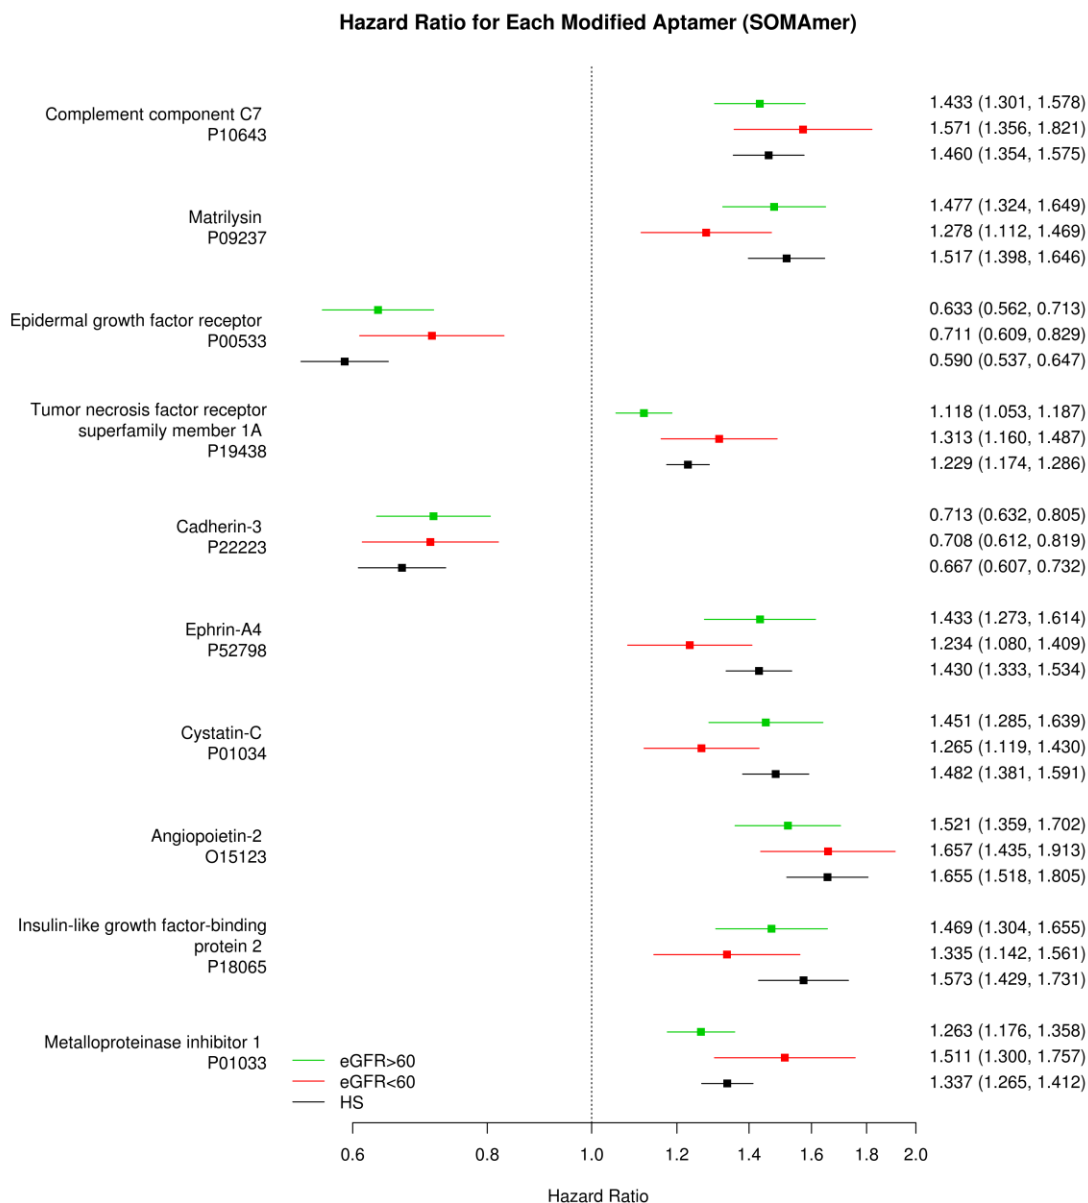

### Hazard Ratio for Each Modified Aptamer (SOMAmer)

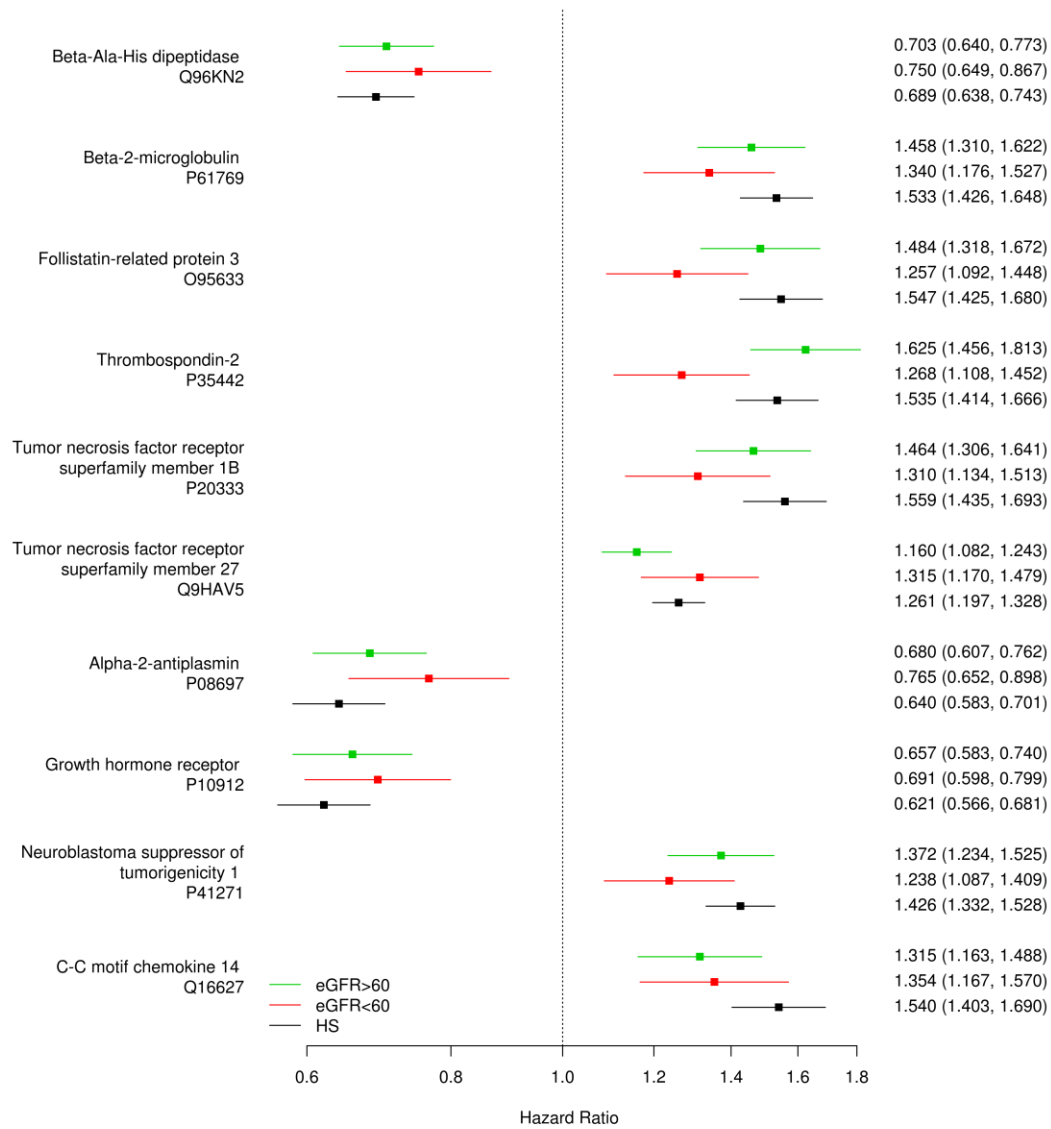

### Hazard Ratio for Each Modified Aptamer (SOMAmer)

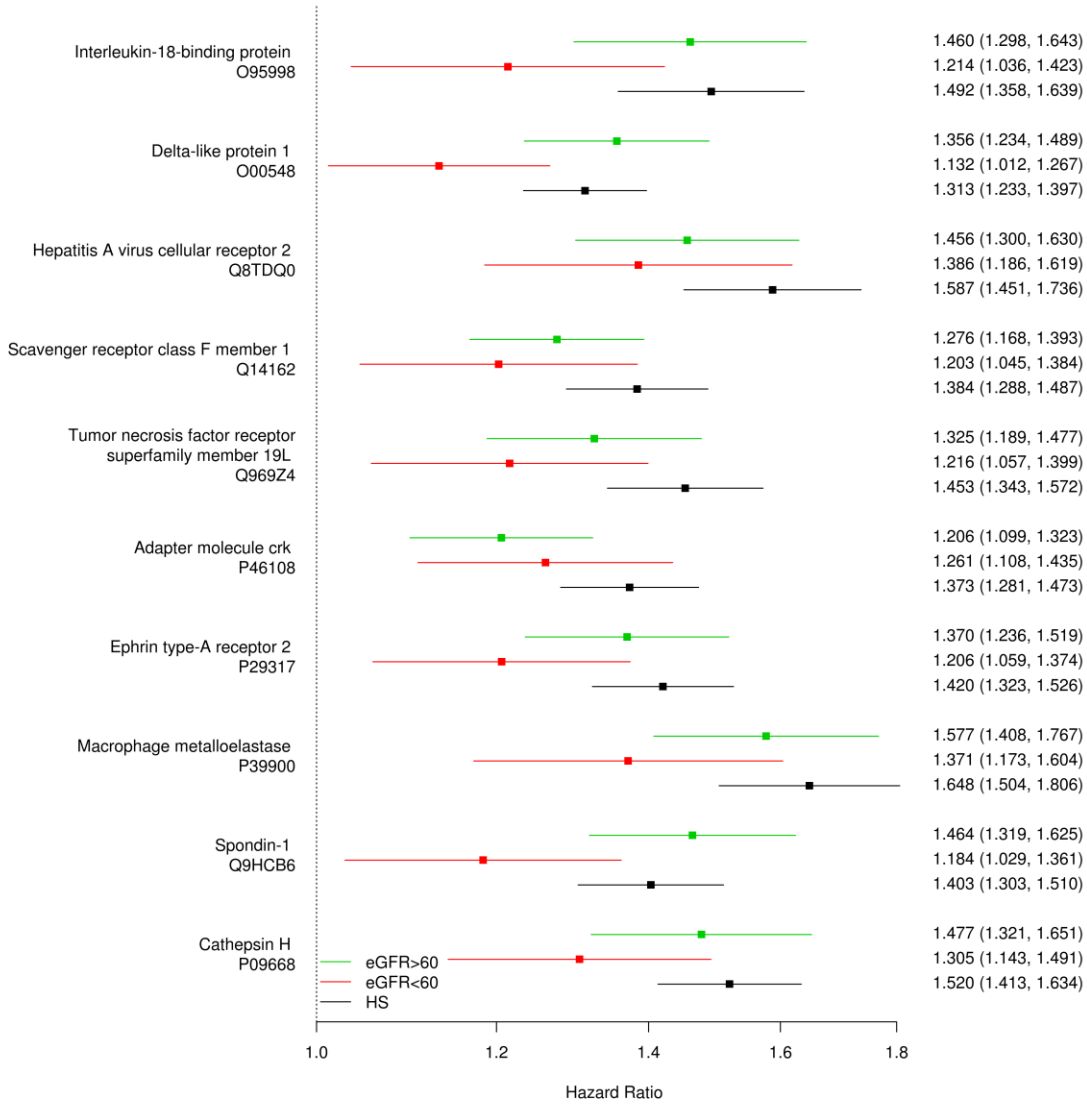

### Hazard Ratio for Each Modified Aptamer (SOMAmer)

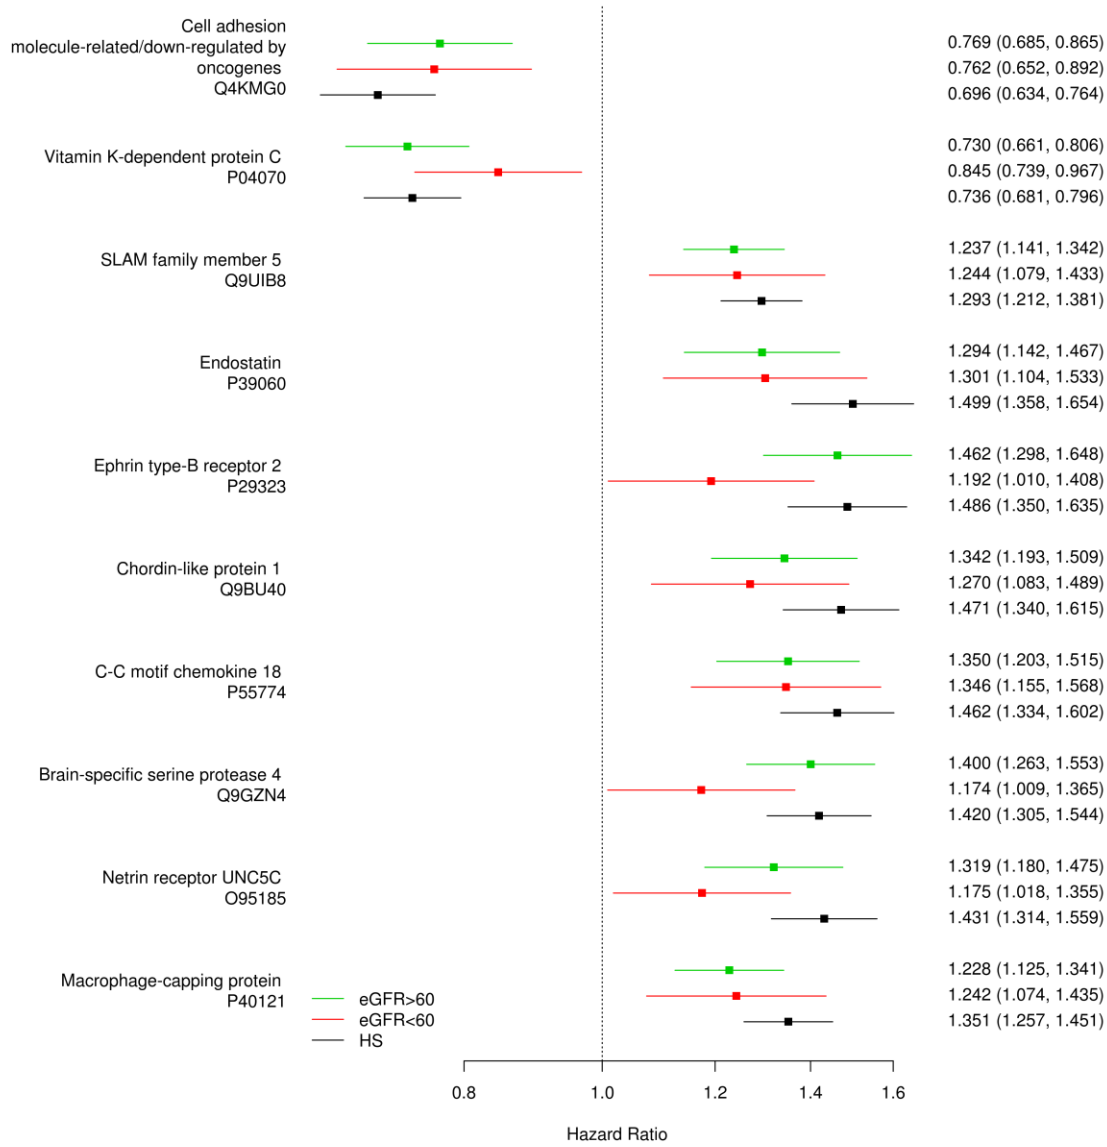

### Hazard Ratio for Each Modified Aptamer (SOMAmer)

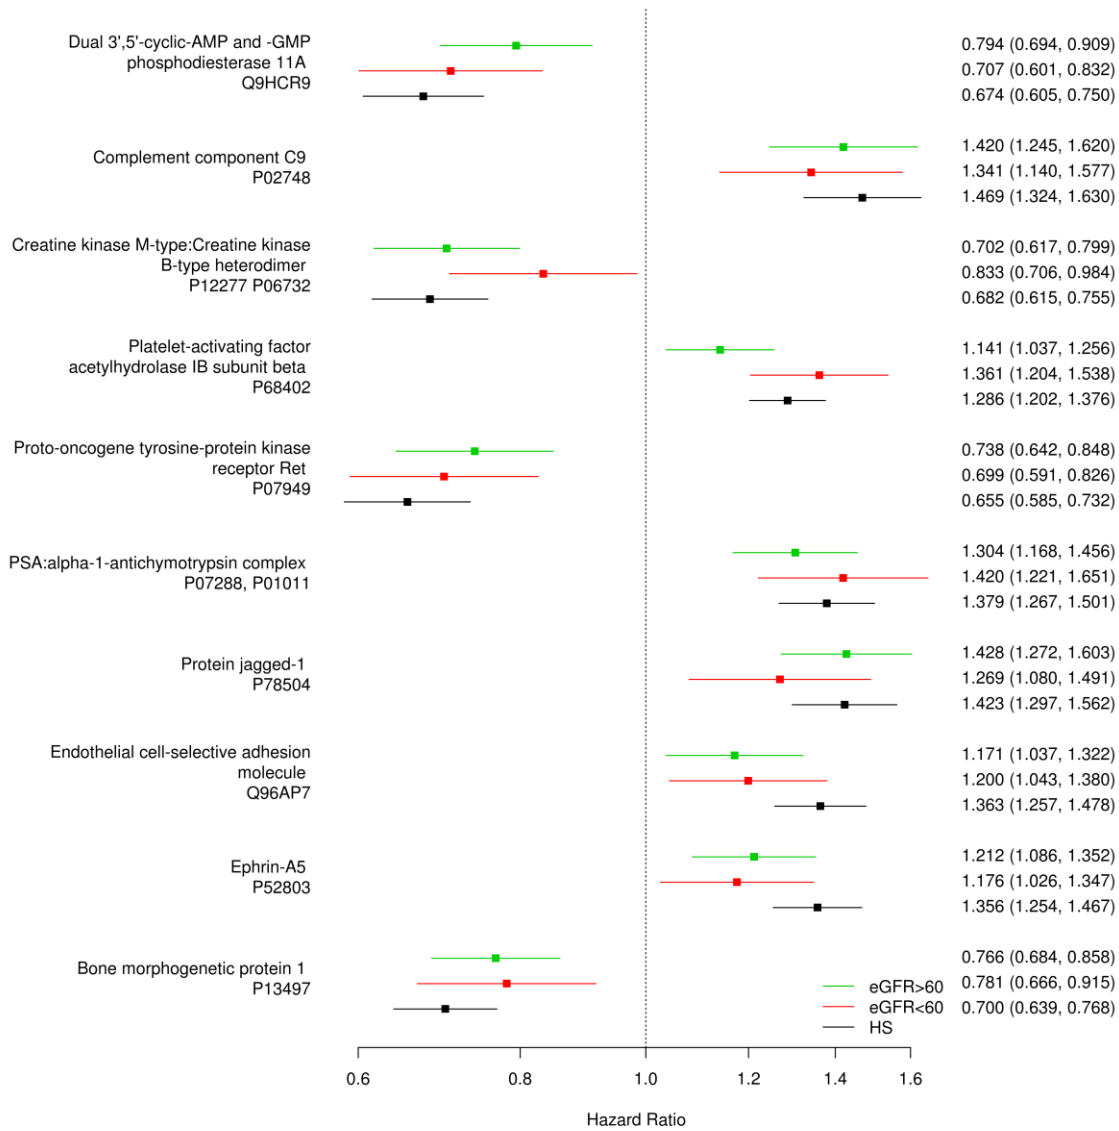

### Hazard Ratio for Each Modified Aptamer (SOMAmer)

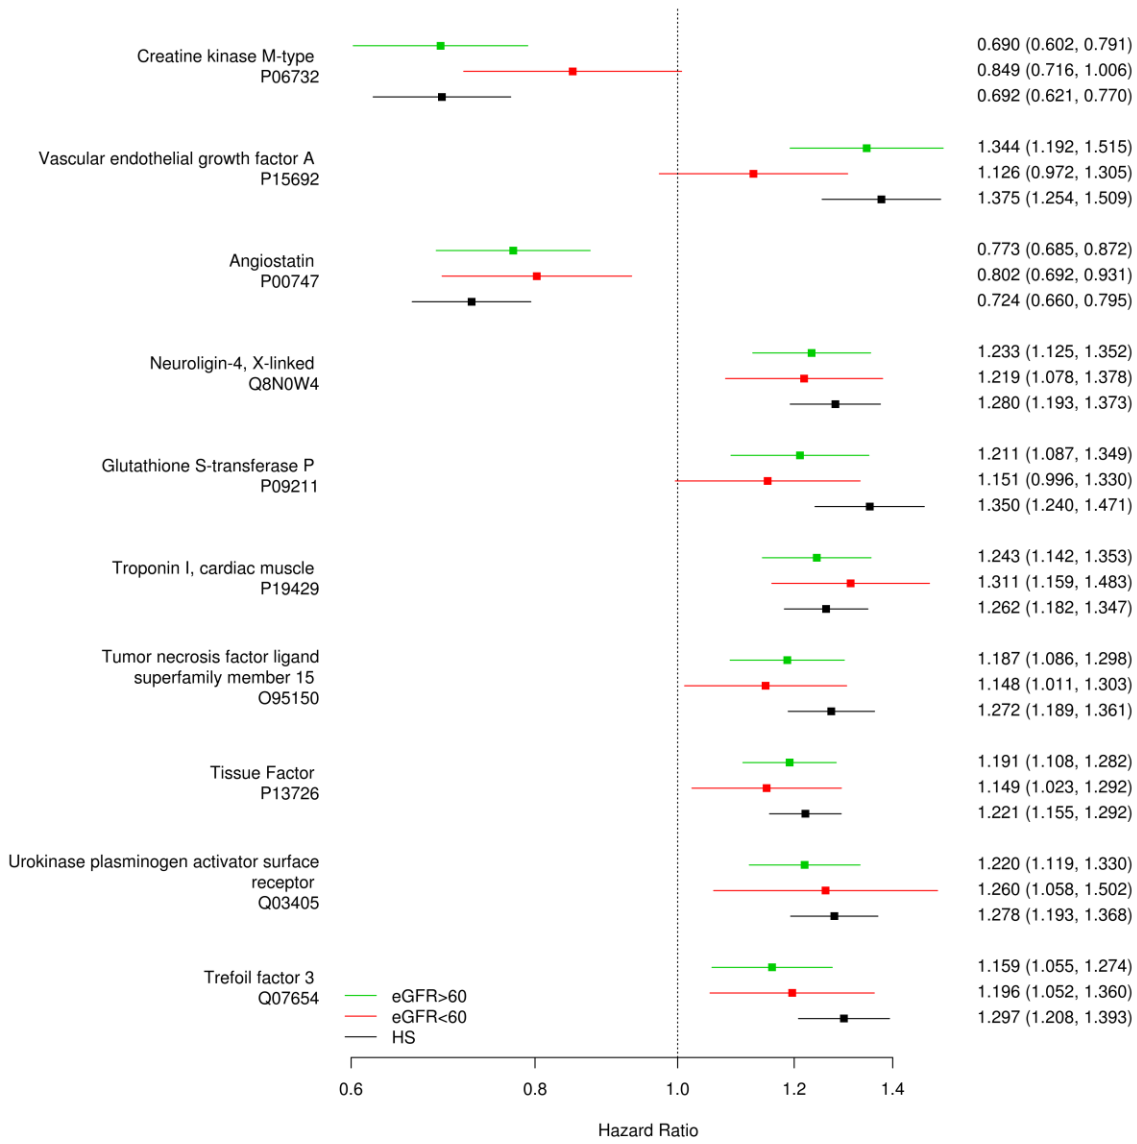



### Hazard Ratio for Each Modified Aptamer (SOMAmer)

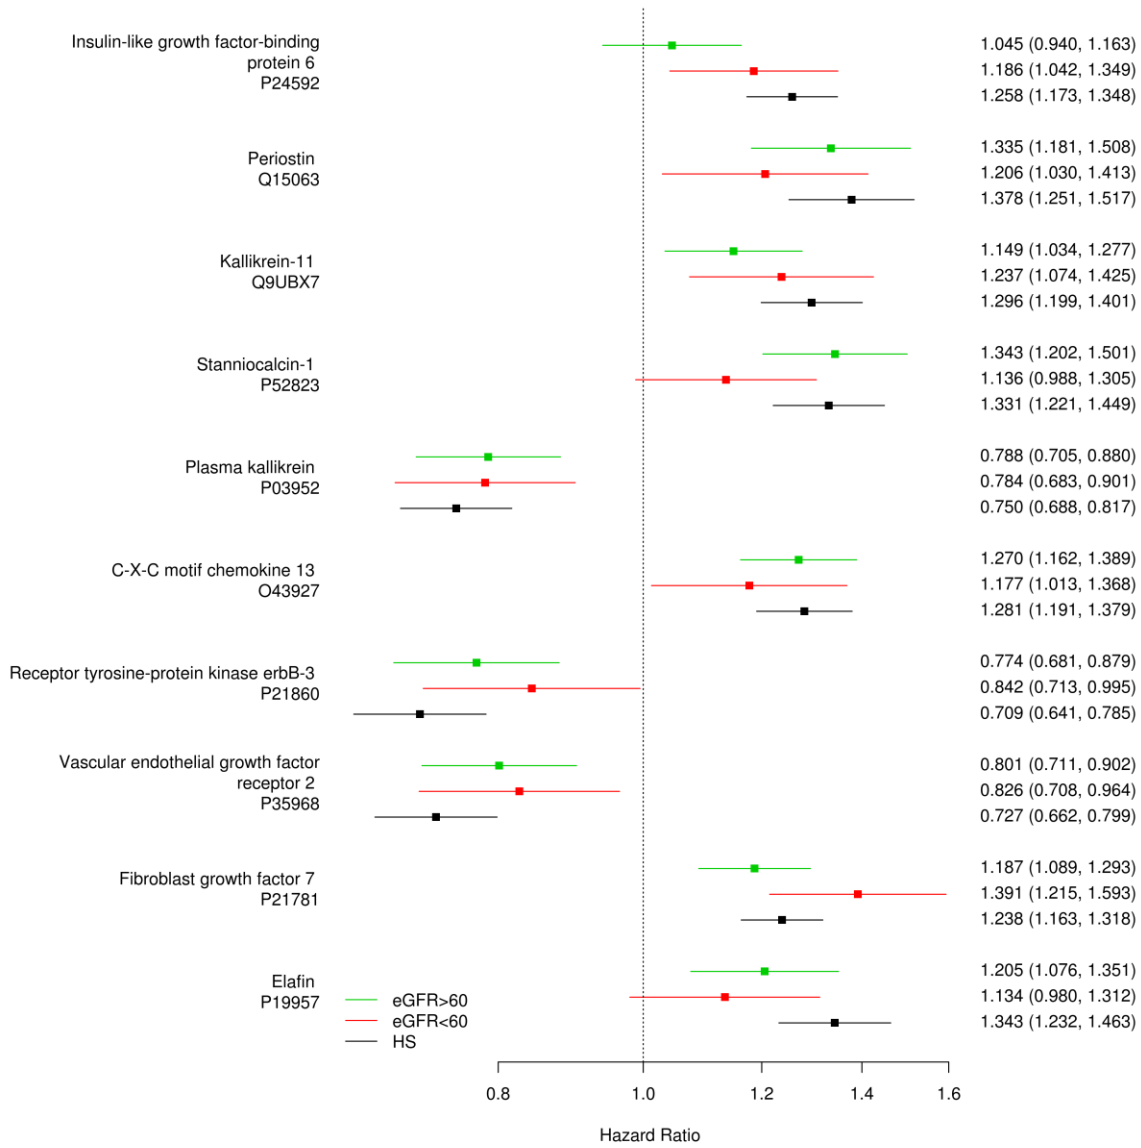

### Hazard Ratio for Each Modified Aptamer (SOMAmer)

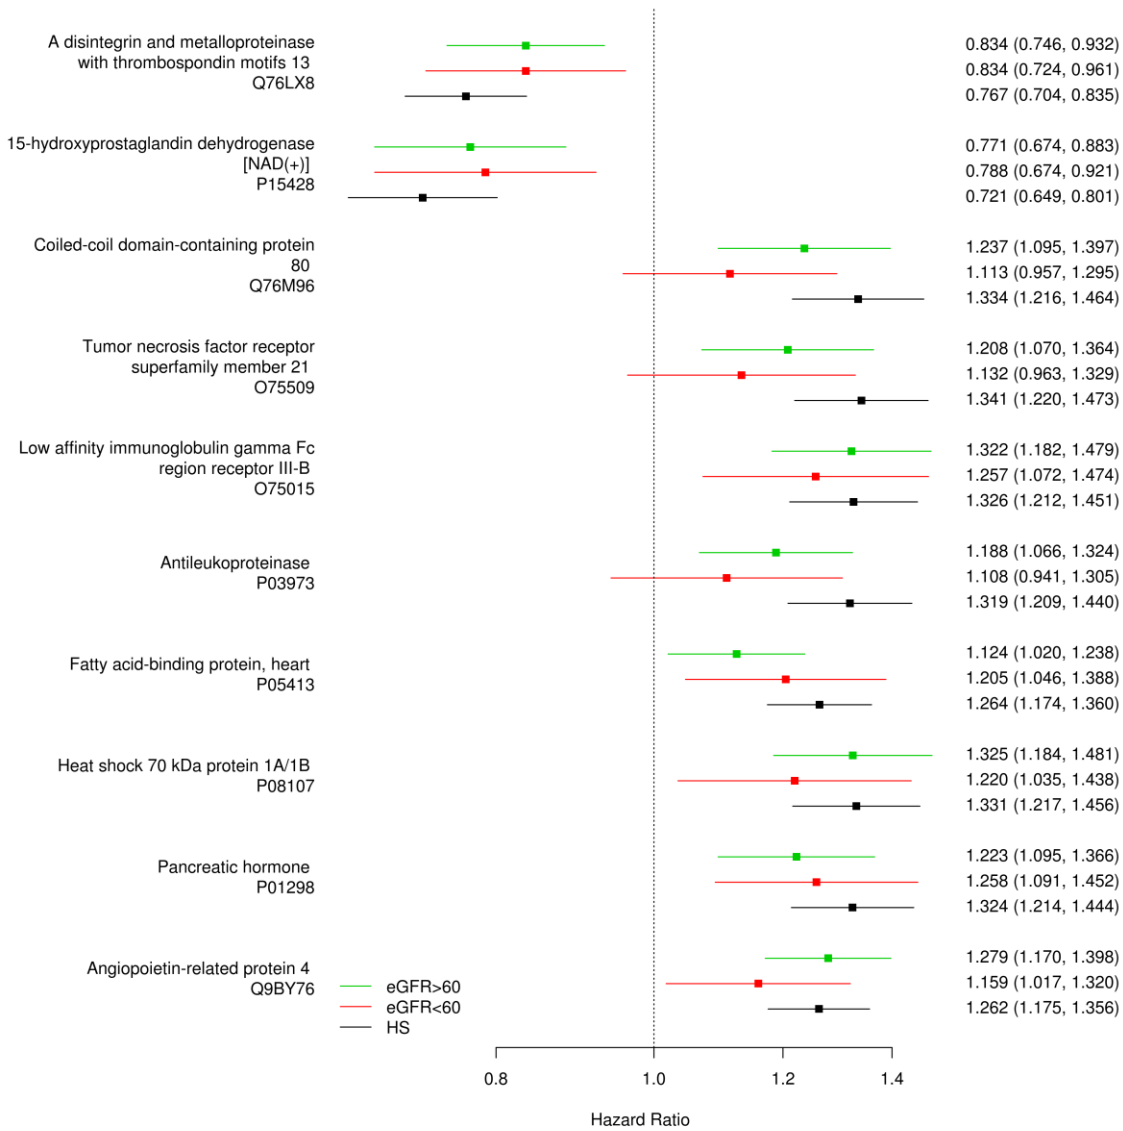

### Hazard Ratio for Each Modified Aptamer (SOMAmer)

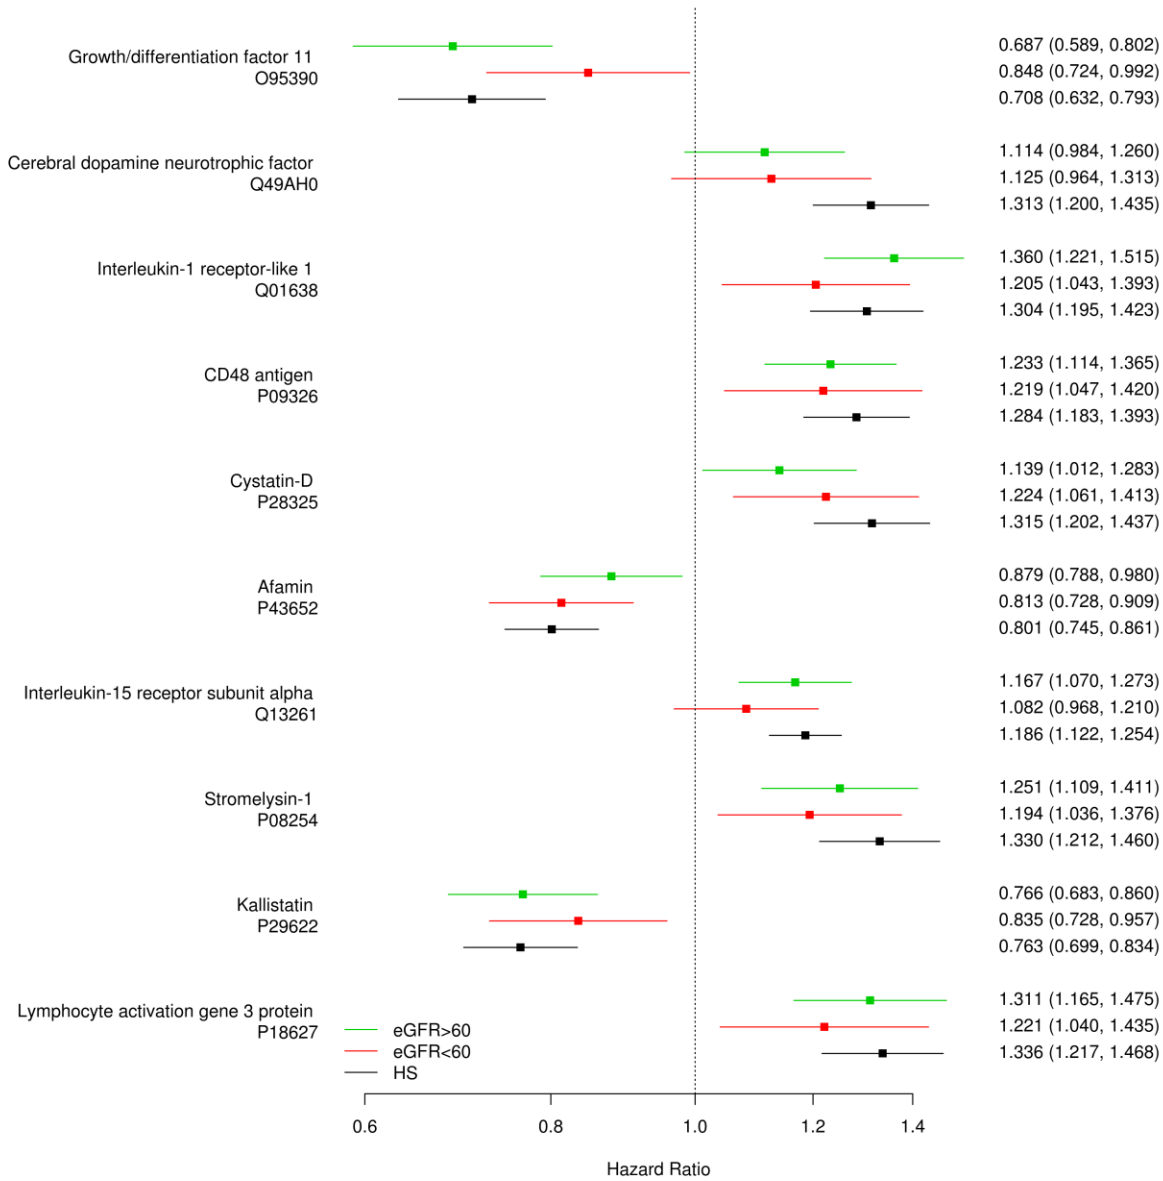

### Hazard Ratio for Each Modified Aptamer (SOMAmer)

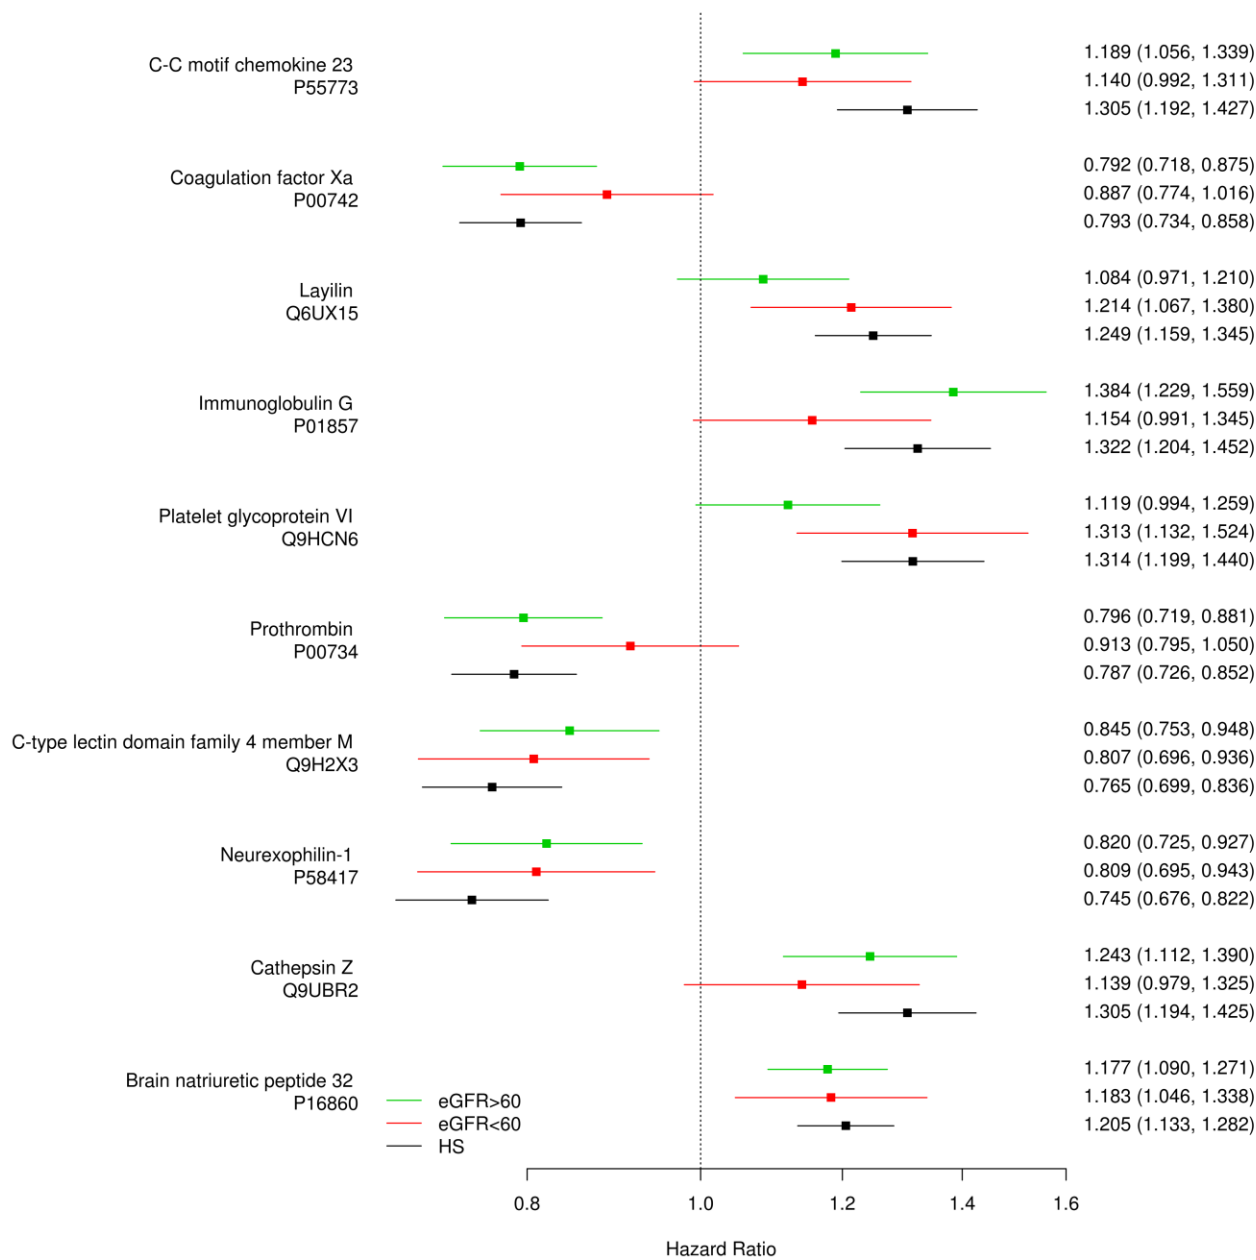

### Hazard Ratio for Each Modified Aptamer (SOMAmer)

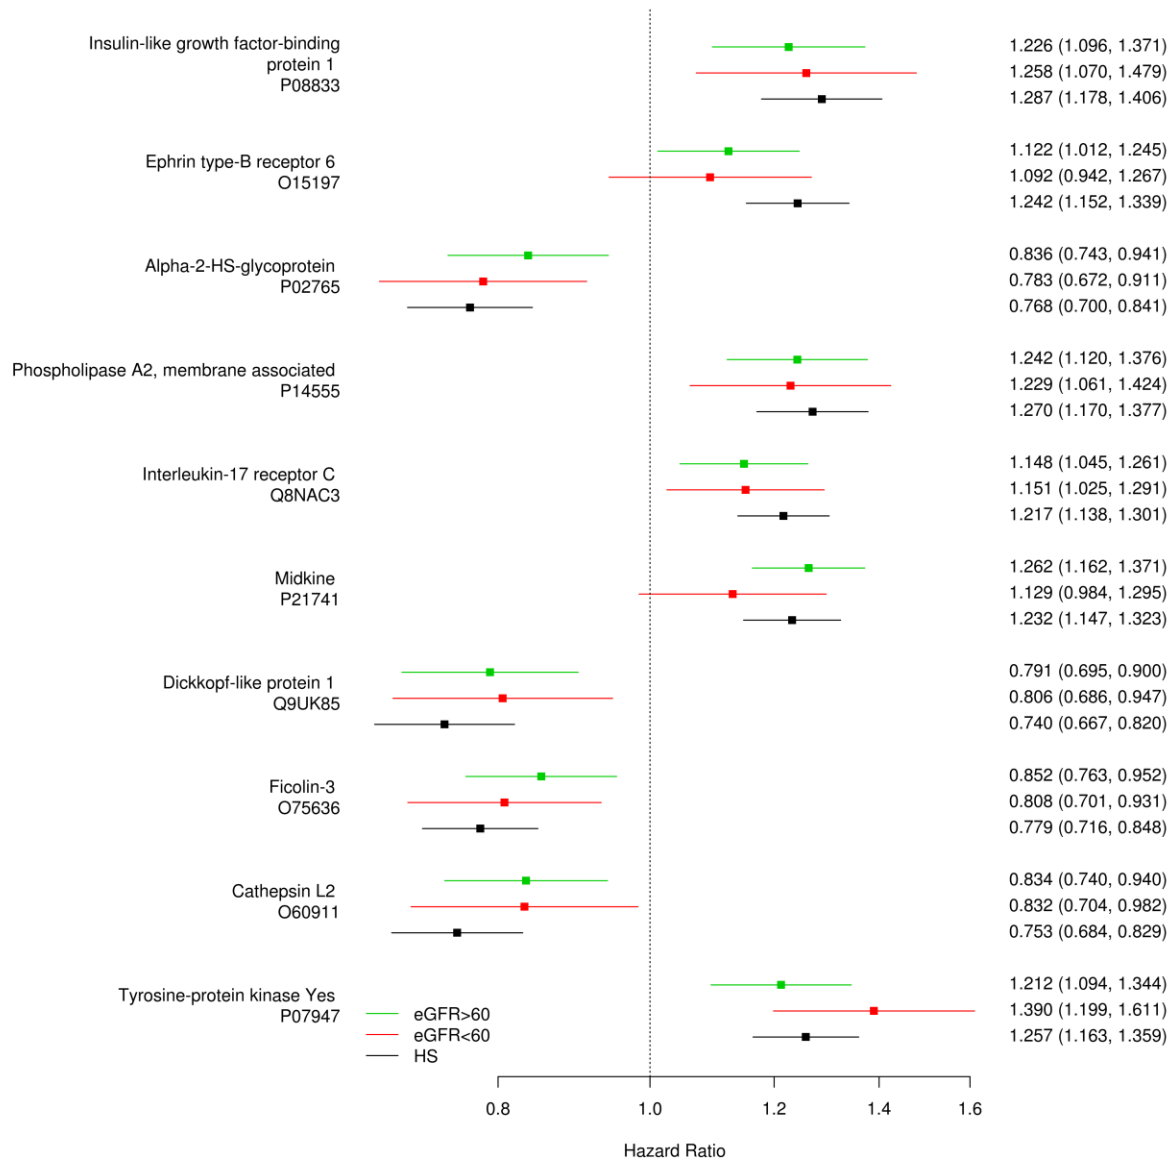

### Hazard Ratio for Each Modified Aptamer (SOMAmer)

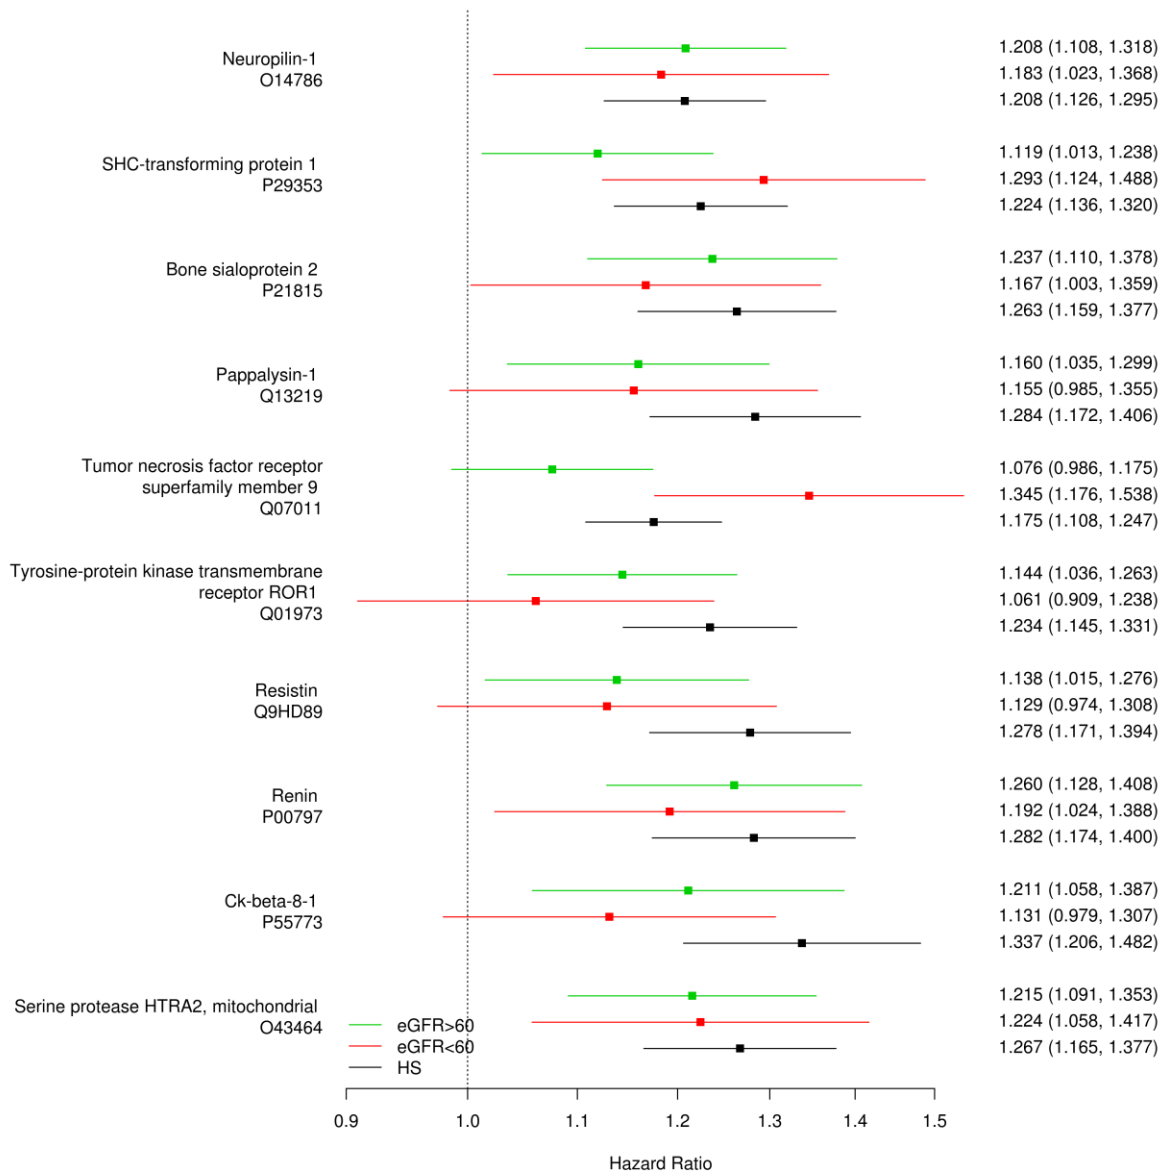

### Hazard Ratio for Each Modified Aptamer (SOMAmer)

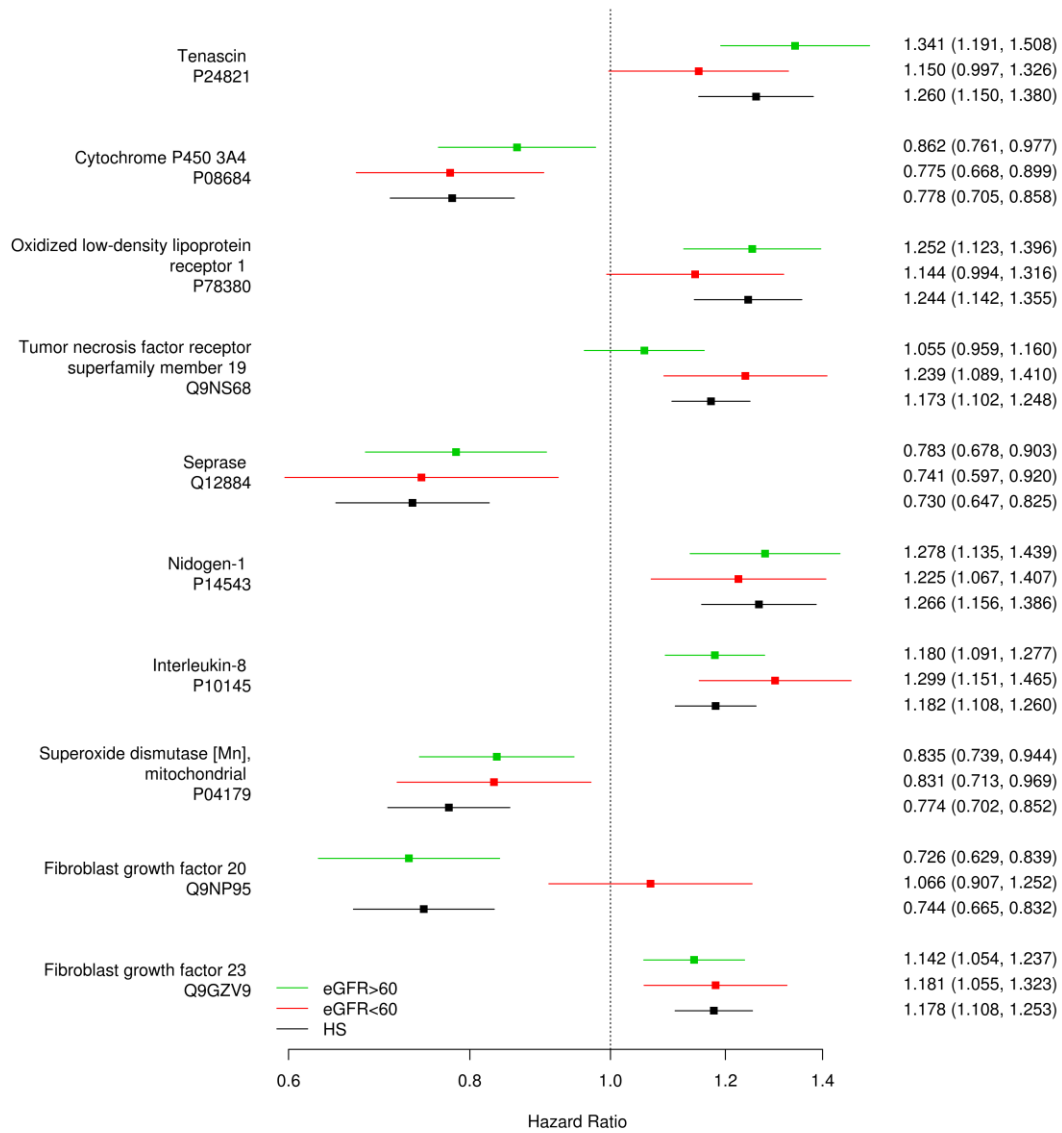

### Hazard Ratio for Each Modified Aptamer (SOMAmer)

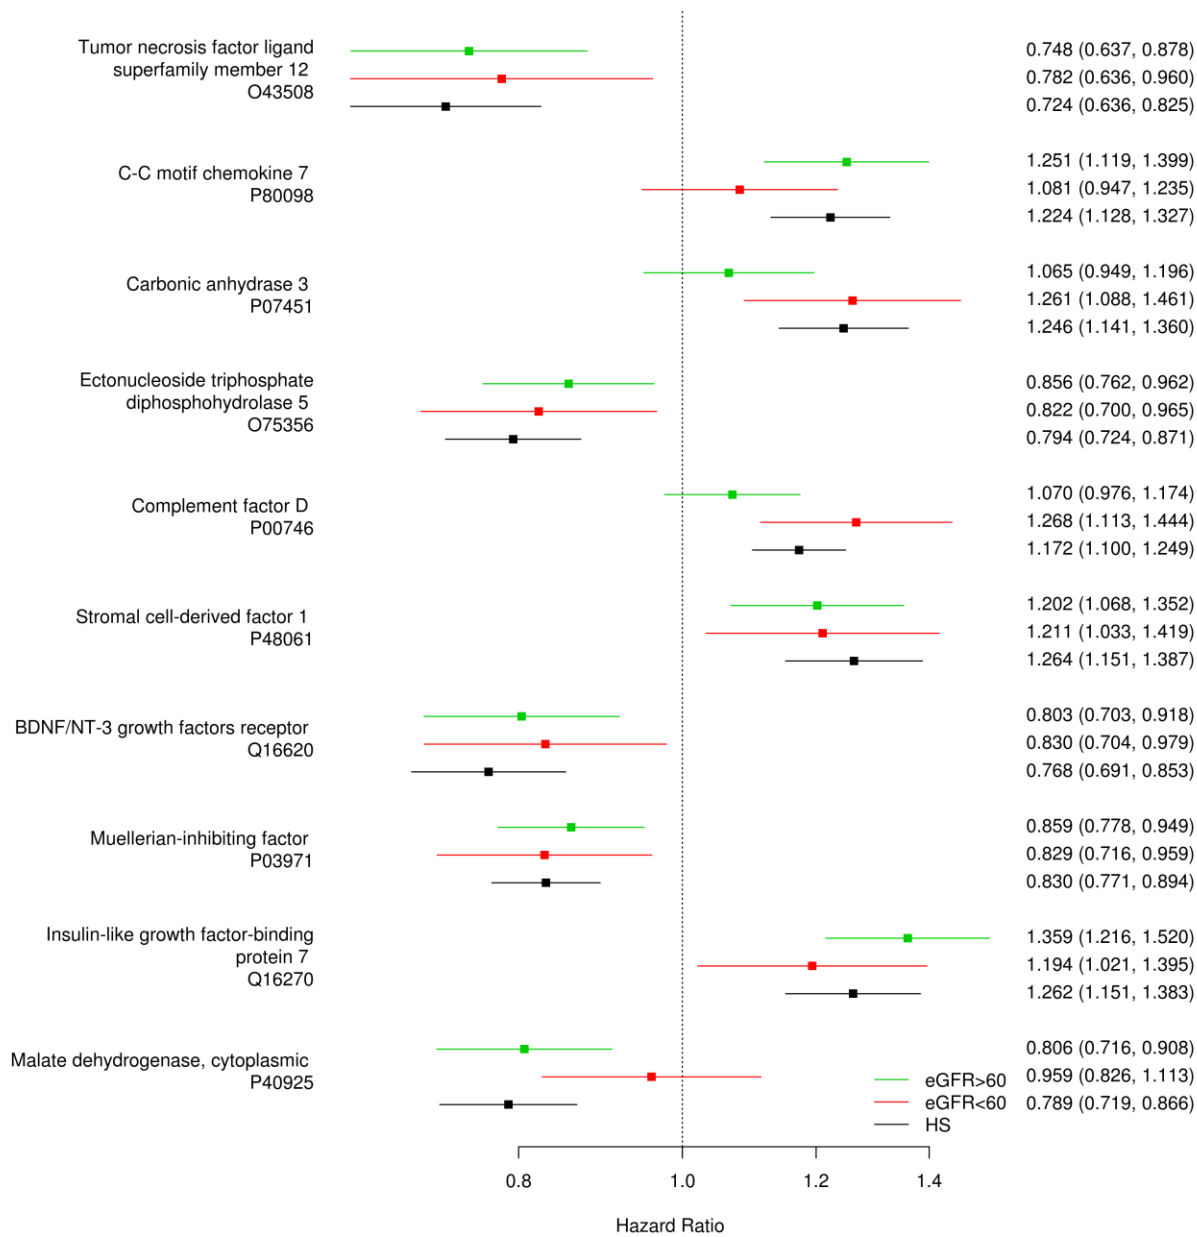



### Hazard Ratio for Each Modified Aptamer (SOMAmer)

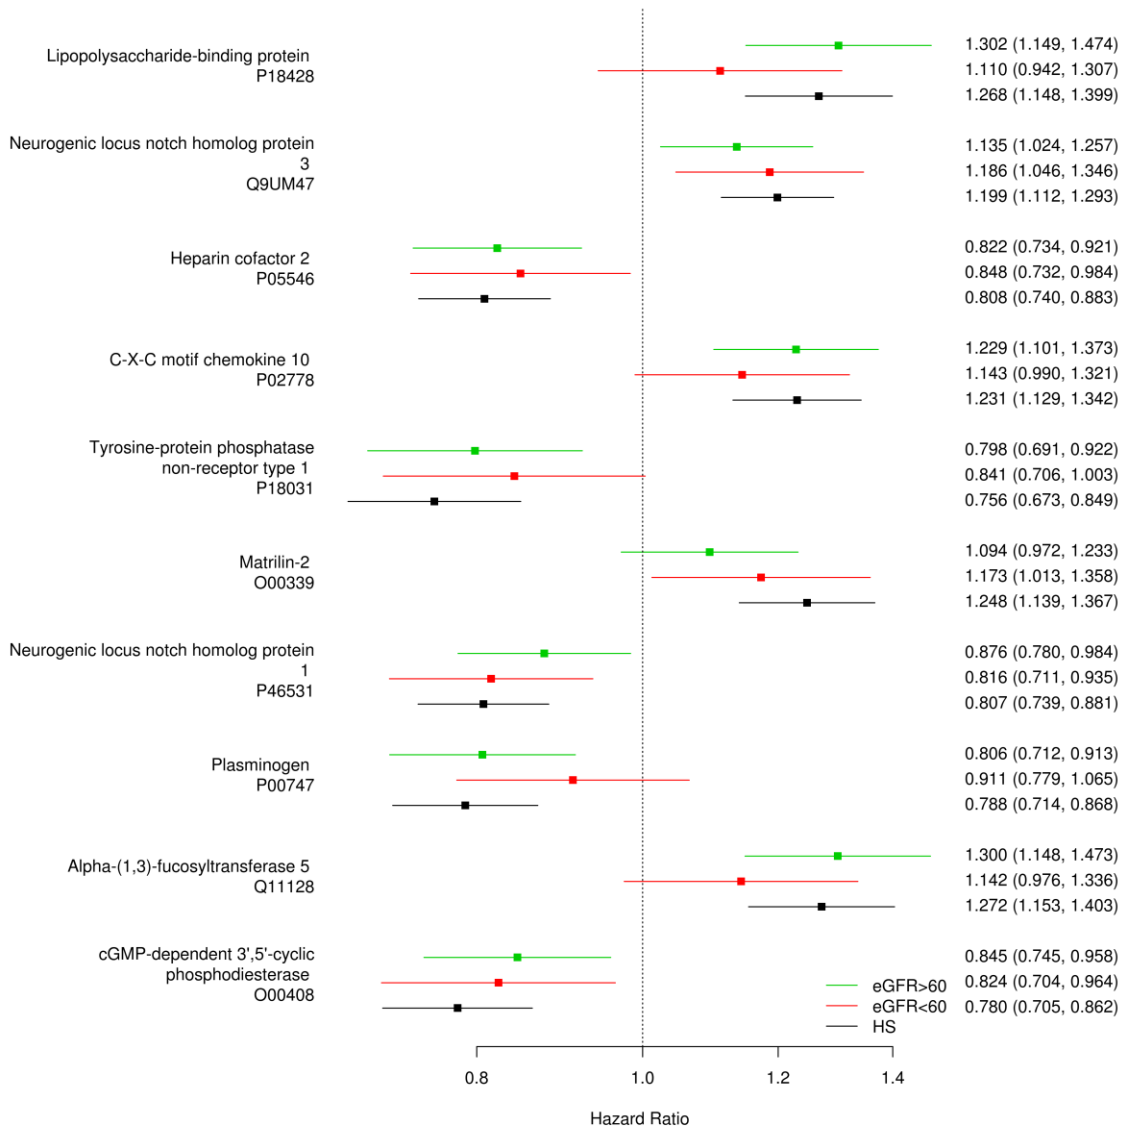

### Hazard Ratio for Each Modified Aptamer (SOMAmer)

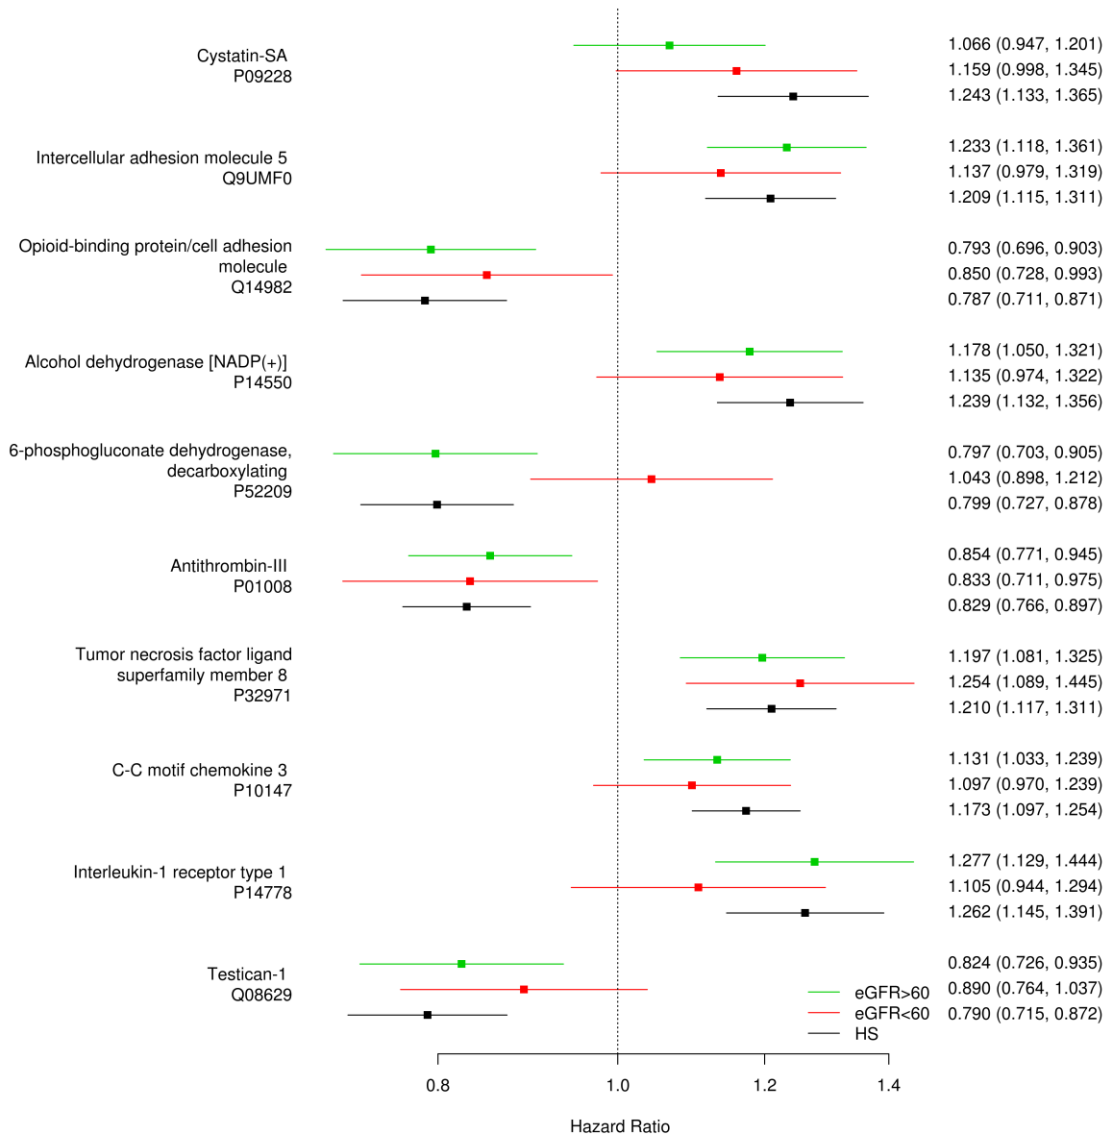

### Hazard Ratio for Each Modified Aptamer (SOMAmer)

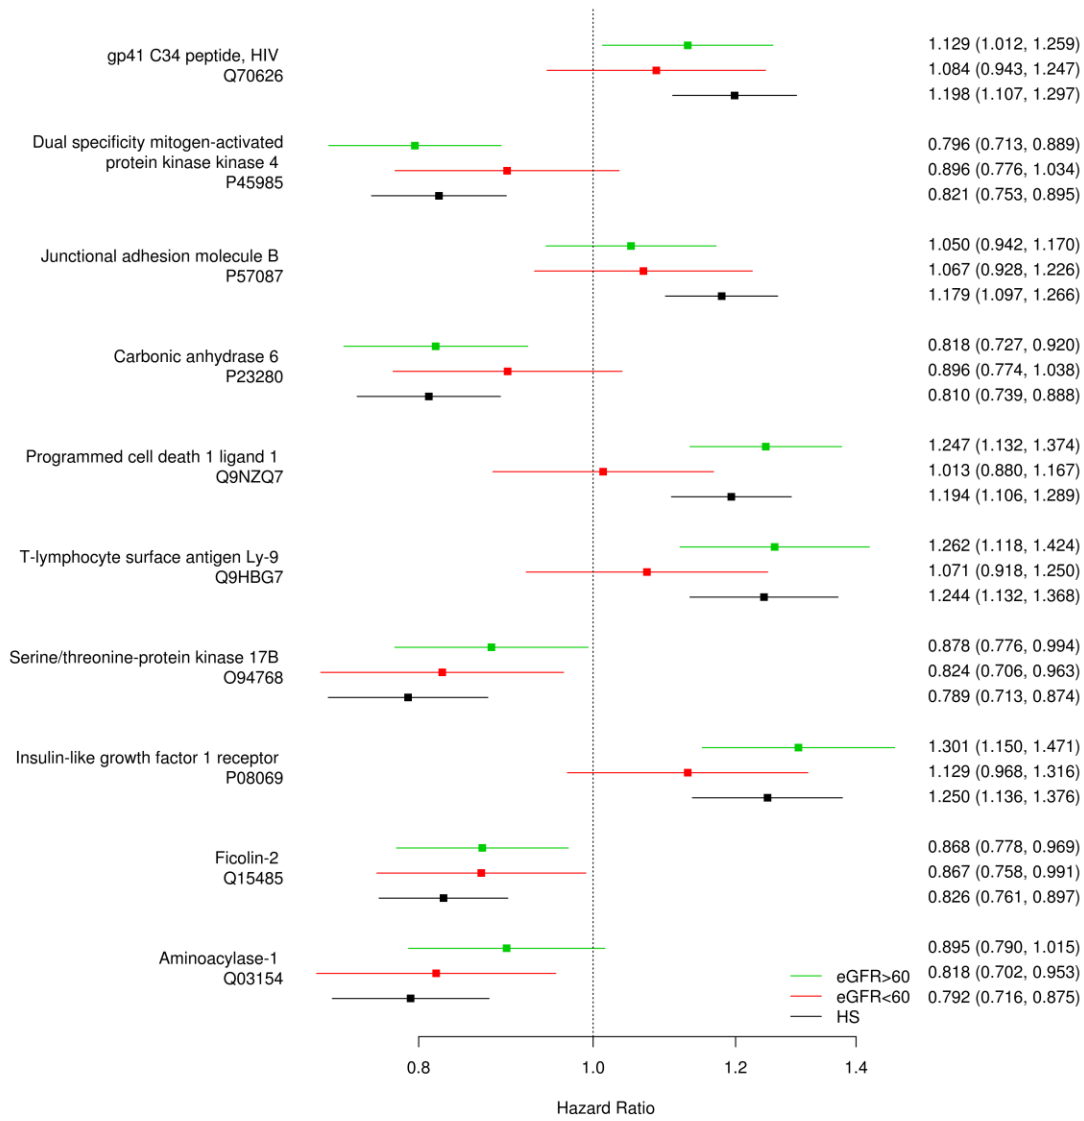

### Hazard Ratio for Each Modified Aptamer (SOMAmer)

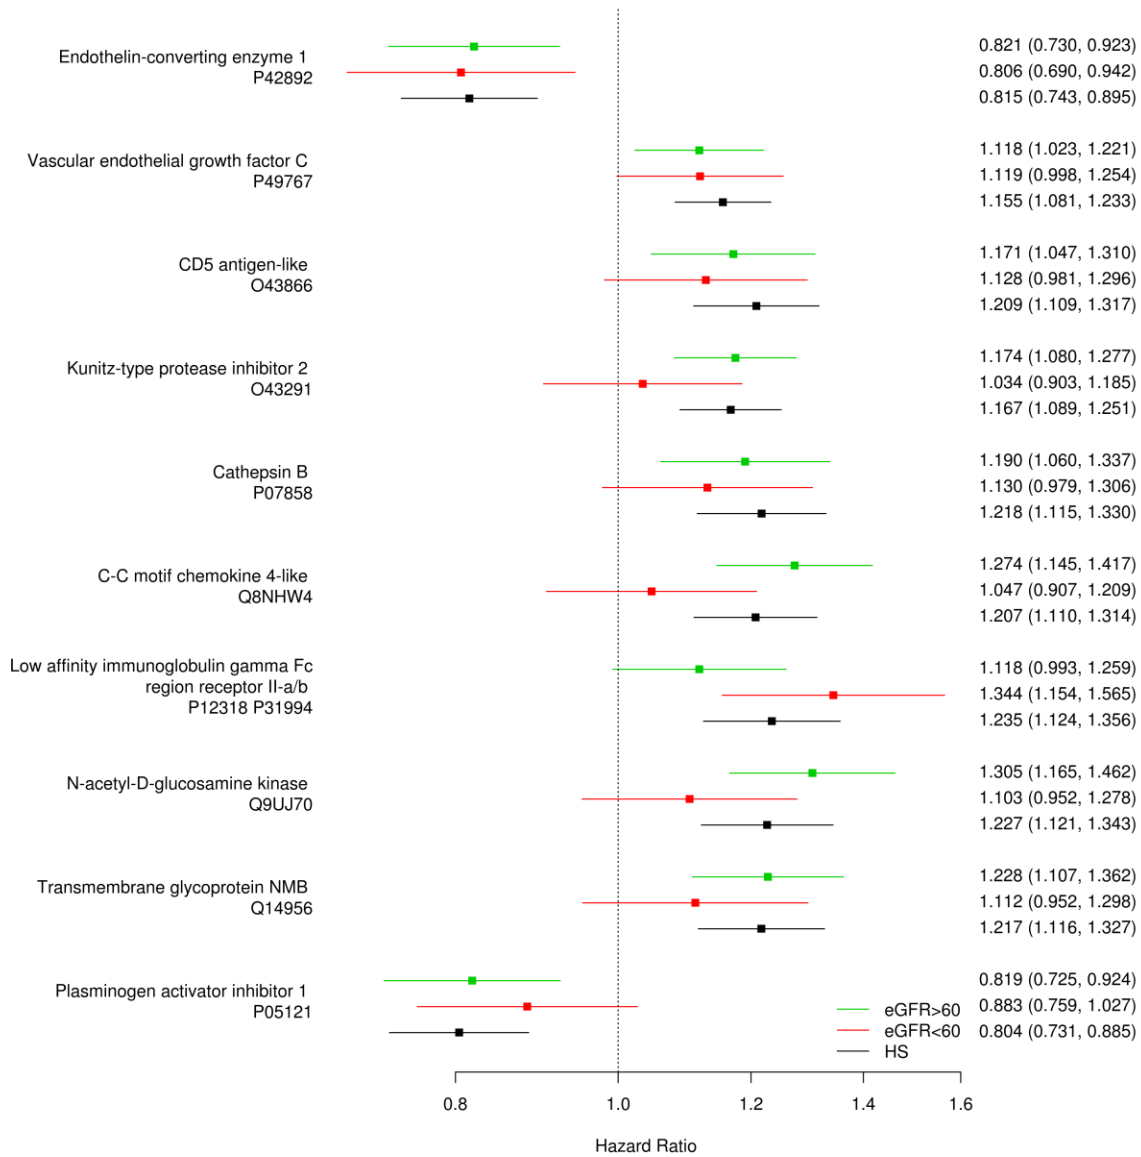

### Hazard Ratio for Each Modified Aptamer (SOMAmer)

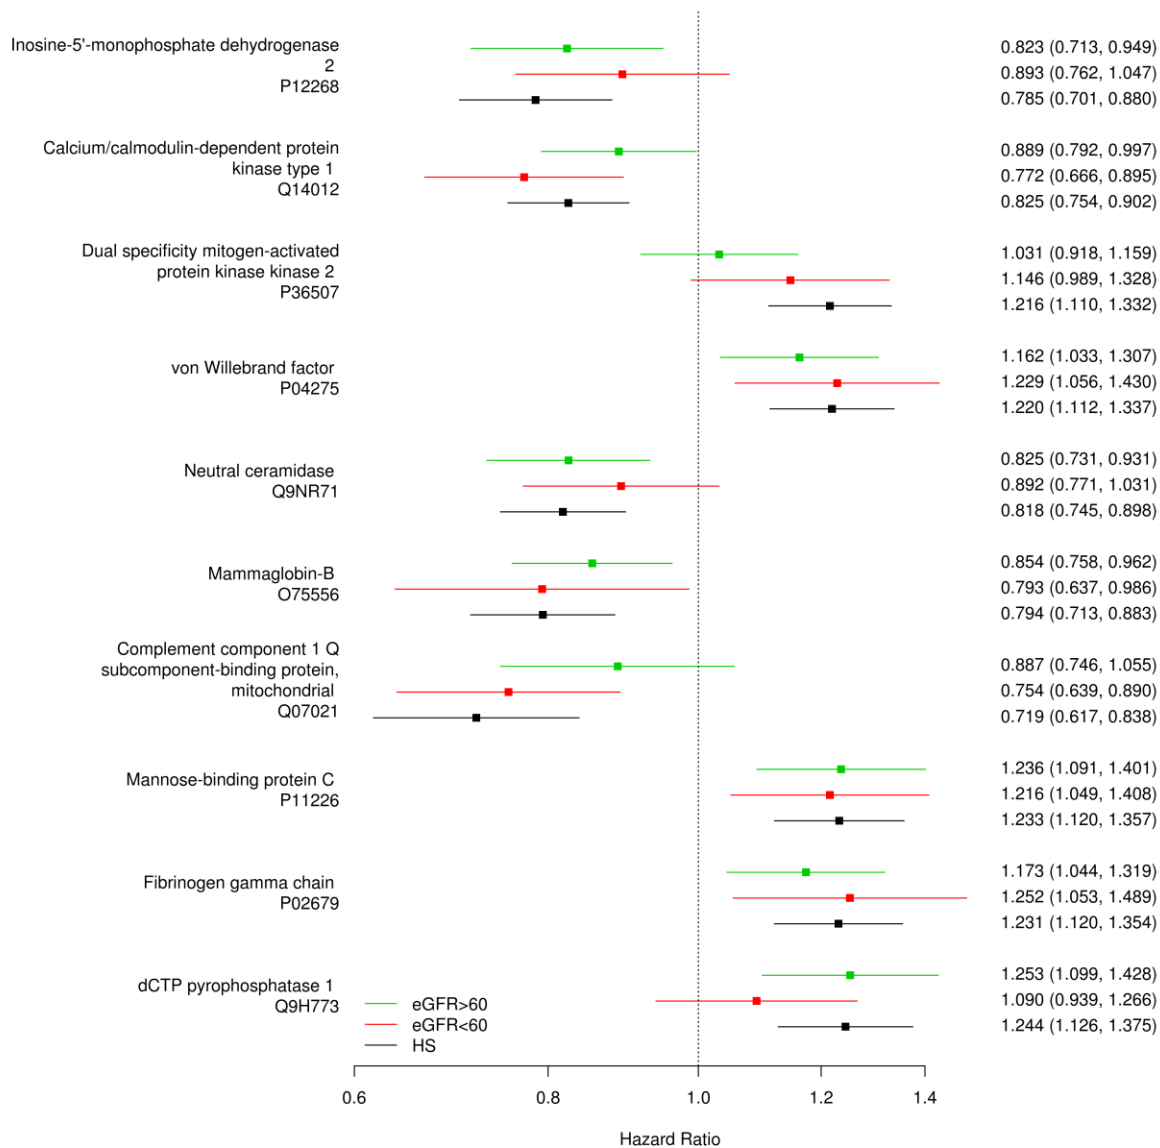

### Hazard Ratio for Each Modified Aptamer (SOMAmer)

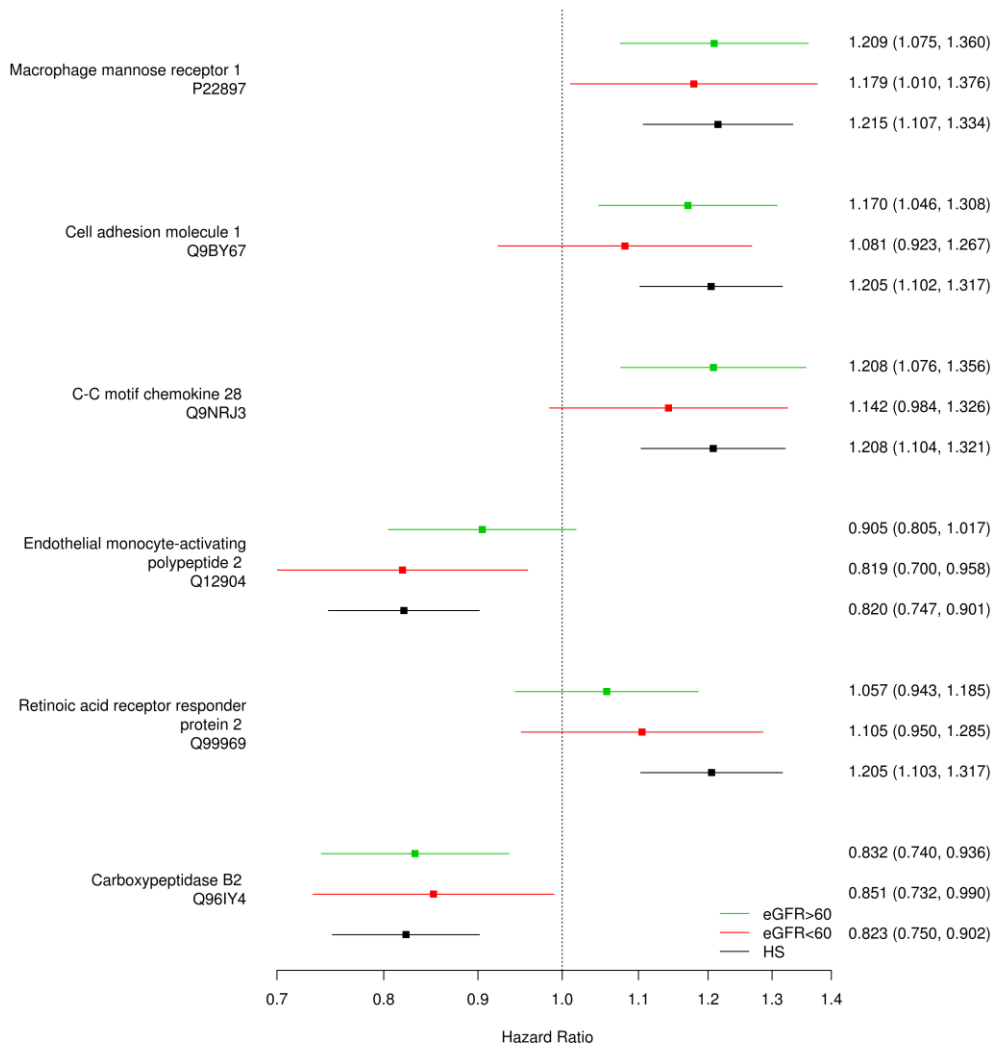

Figure S2. Spearman rho coefficients among the top 100 proteins in the Heart and Soul cohort, which were also measured in the Lund cohort (shown are 98 of 100 proteins that were measured in both cohorts).

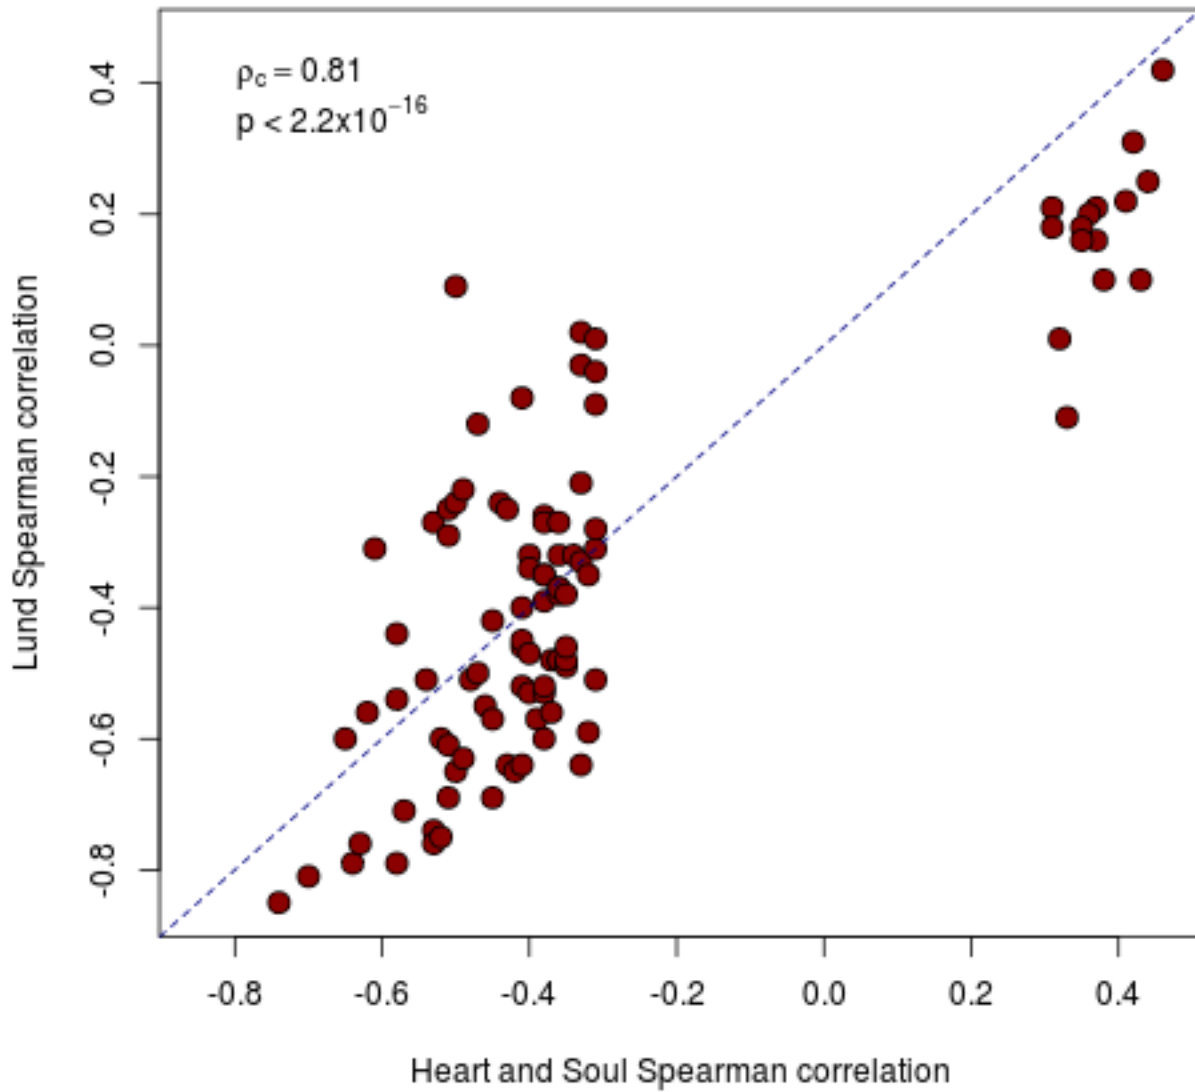

Supplement: JAH3-9-e016463-s001.pdf [file JAH3-9-e016463-s001.pdf]
